# Supplementary material for: Conserved differences in protein sequence determine the human pathogenicity of Ebolaviruses
Source: PubMed Central journal article supplement (PMC4806318; doi:10.1038/srep23743), 2016-03-24
Supplement: srep23743-s1.pdf [file srep23743-s1.pdf]

## Supplementary Materials

### **Conserved differences in protein sequence determine the human pathogenicity of Ebolaviruses**

**Authors:** Morena Pappalardo†, Miguel Juliá†, Mark J. Howard, Jeremy S. Rossman\*, Martin Michaelis\*, Mark N. Wass\*

**Affiliation:**

Centre for Molecular Processing and School of Biosciences, University of Kent, Canterbury, Kent CT2 7NJ, UK.

\*Correspondence to: M.N.Wass@kent.ac.uk (Mark N. Wass), M.Michaelis@kent.ac.uk (Martin Michaelis), J.S.Rossman@kent.ac.uk (Jeremy S. Rossman)

† equal contribution.

## Supplementary Material

### Supplementary Methods - Subsampling of sequence data

The sensitivity of the SDP analysis to the number of sequences available was considered by subsampling the sequences. Sampling was performed for; only the human pathogenic group; only the Reston group; and for both groups simultaneously. Subsampling was performed using between 10%-90% of sequences in the group, increasing in 10% increments. For each percentage setting the group was sampled 50 times. Where both groups were sampled simultaneously they were done so with the same percentage of sequences i.e. at 20% sampling the SDPs were predicted each time using 20% of the human pathogenic sequences in one group and 20% of the Reston sequences in the other. For each sample s3det was run to predict SDPs using the same settings as for the full dataset. Completely conserved SDPs are also compared to those that are not completely conserved. The total number of SDPs predicted when sampled is shown in supplementary Figure 6. When the sequences of human pathogenic Ebolaviruses were sampled, while the number of Reston sequences remained constant, we observed that the number of SDPs predicted decreased as the proportion of sequences sampled increased. We further observed that even when a very high proportion of sequences was sampled (70%-90%), that there was still some variation in the number of SDPs, indicating that there was still further information present in the excluded sequences. When the Reston virus sequences were sampled, the pattern observed varied between the proteins (Supplementary Figure 6B). For GP, L and VP30, sampling resulted in more SDPs being predicted than in the full dataset, with the number reducing as the proportion of sequences sampled increased. For NP, sampling the Reston sequences generated some samples where fewer SDPs than the total present in the full dataset were predicted and other samples where a larger number of SDPs were predicted. This is possible for SDPs that are not completely conserved in the two groups, as sampling may generate some sets of sequences where these positions appear variable and others where they are conserved. For VP35, sampling led to fewer SDPs being predicted until 90% of sequences were used. The number of SDPs in VP24 and VP40 was invariant across all samples. When sampling both groups (Supplementary Figure 6C) we found that the number of SDPs predicted very quickly converged to the number of SDPs present in the full dataset.

We then considered the number of SDPs predicted that are present in the full dataset and those that are present only in sampling (Supplementary Figure 7). When the human pathogenic sequences were sampled (Supplementary Figure 7A), we found that the vast majority of SDPs in the full data set were predicted at all sampling levels. We also found that when a small proportion of sequences were sampled,

that many new SDPs were predicted, which for some proteins (e.g. GP, NP and VP40) may be greater than the total number of SDPs present in the full dataset. This may not be too surprising given that positions that are variable in the full dataset may appear to be conserved when a small sample of sequences was taken. As the proportion of sequences sampled increased, very few new SDPs were predicted. Sampling the Reston sequences (Supplementary Figure 7B) we again found that the vast majority of SDPs present in the full dataset was present in all samples. The number of new SDPs present in samples was much smaller than for sampling of the human pathogenic sequences, which is likely to be due to the smaller number of Reston sequences, resulting in fewer samples where positions are conserved that are not conserved in the full data set. When both groups were sampled, results were very similar to that observed when the human pathogenic group was sampled (Supplementary Figure 7C).

Finally, we considered the number of SDPs in the sampling sets that are completely conserved and those that are not (Supplementary Figure 8). In conjunction with the data from Supplementary Figure 7, this shows that sampling generates new SDPs that are completely conserved (i.e. only one amino acid in each group) and also some where there is variation within one or both groups. As the proportion of sequences sampled increased these numbers quickly converged to the numbers observed in the full dataset. Some of these included SDPs which in some samples were completely conserved but as further sequences were added, variation was introduced and they were no longer completely conserved. In such cases there was a change ranking for the SDP, as when completely conserved it was ranked 1, and this ranking was reduced once the position was not completely conserved.

## Supplementary Figures

**Supplementary Figure 1.** Phylogenetic tree of the Ebolavirus genomes and individual proteins. Bayesian and Maximum Likelihood phylogenetic trees are shown for the Ebolavirus genomes and each of the Ebolavirus proteins. A) genome Bayesian tree. B) Genome maximum likelihood tree, C) Bayesian tree for protein L, D)Maximum likelihood tree for protein L, E)Bayesian tree for protein GP, F)Maximum likelihood tree for protein GP, G)Bayesian tree for protein NP, H)Maximum likelihood tree for protein NP, I)Bayesian tree for protein VP24, J)Maximum likelihood tree for protein VP24, K)Bayesian tree for protein VP30, L)Maximum likelihood tree for protein VP30, M)Bayesian tree for protein VP35, N)Maximum likelihood tree for protein VP35, O)Bayesian tree for protein VP40. P)Maximum likelihood tree for protein VP40. All trees use Ebola virus as root (EBOV, Ebola virus; BDBV, Bundibugyo virus; SUDV, Sudan virus; TAFV, Taï Forest virus; RESTV, Reston virus).

**Fig S1A**

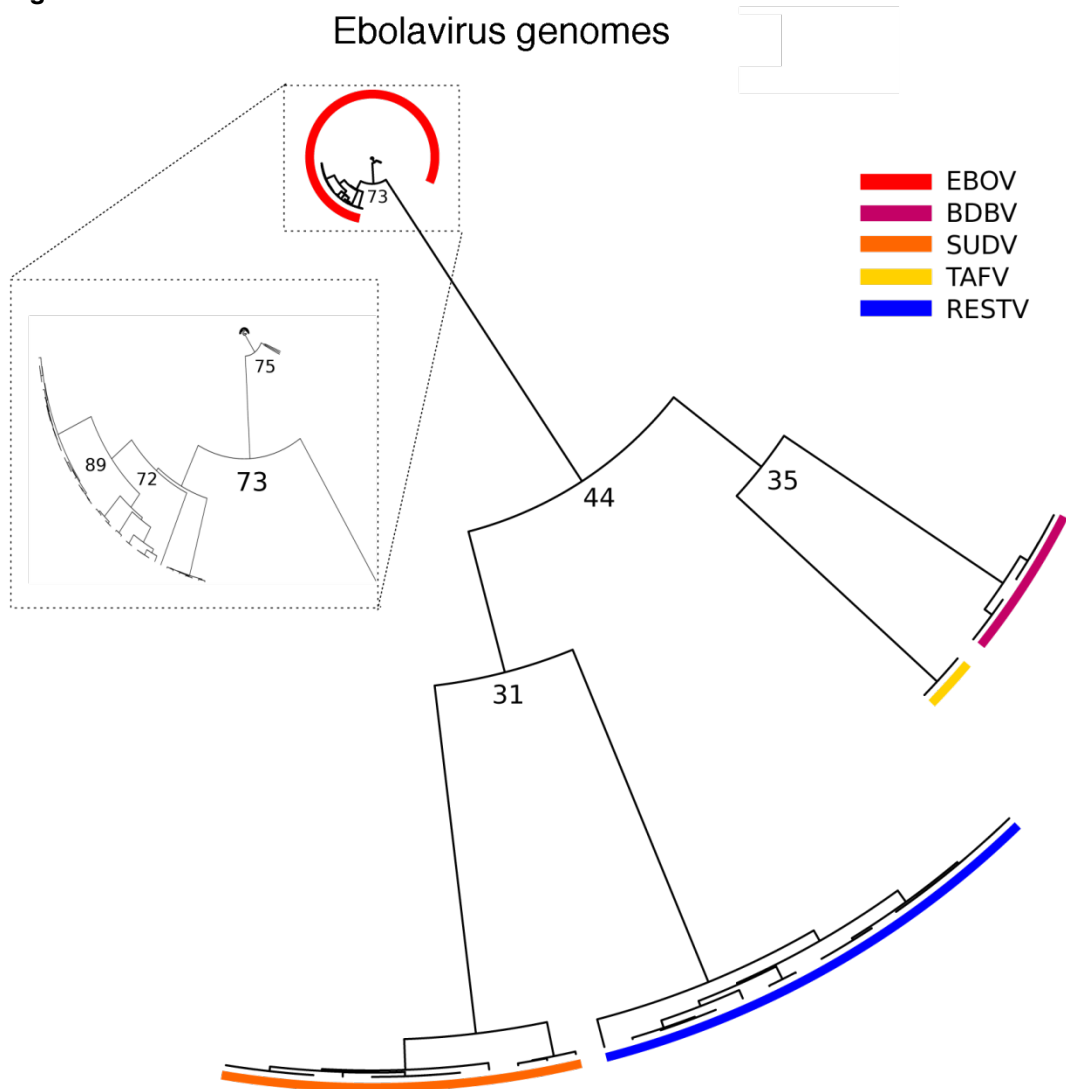

# Ebolavirus Genomes

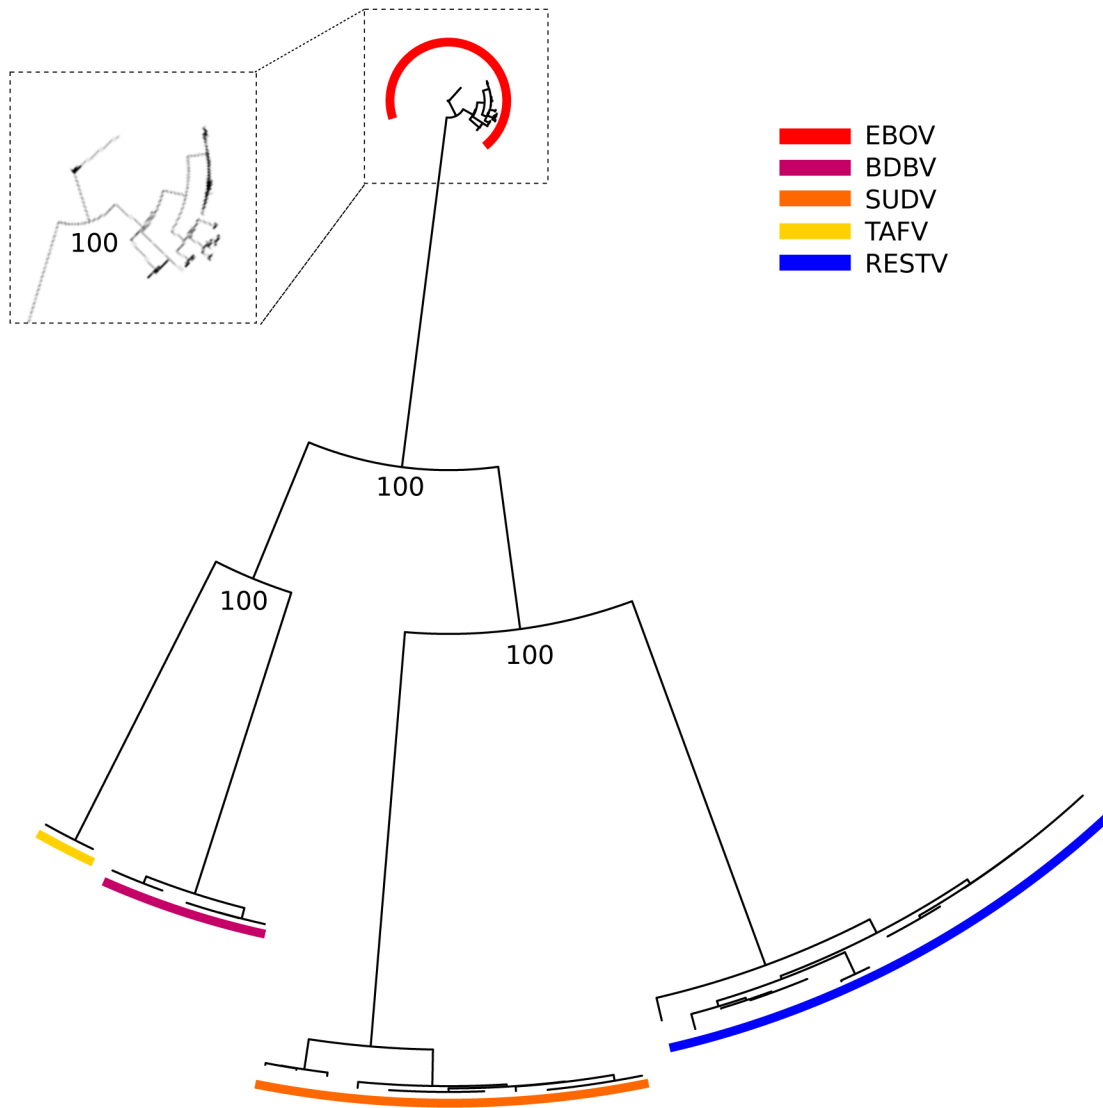

Fig S1B.

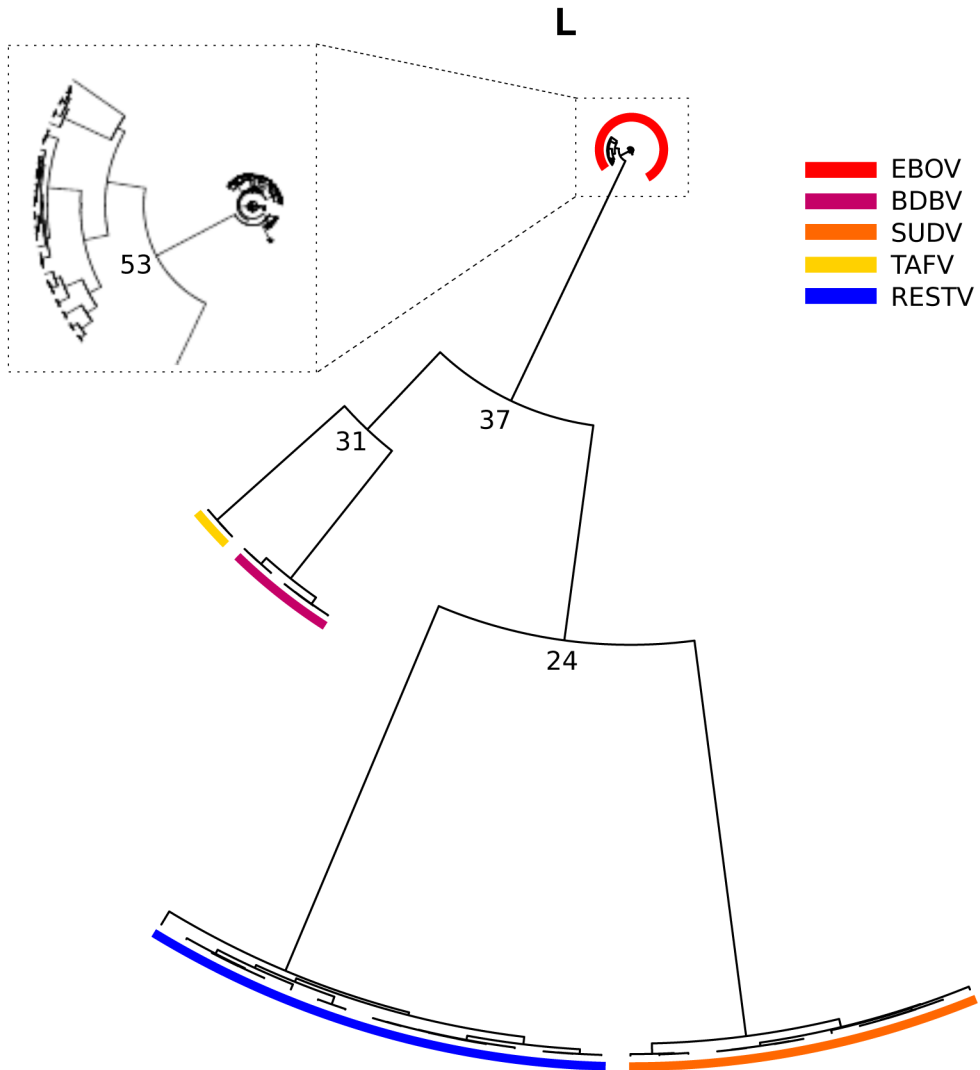

Fig SIC.

L

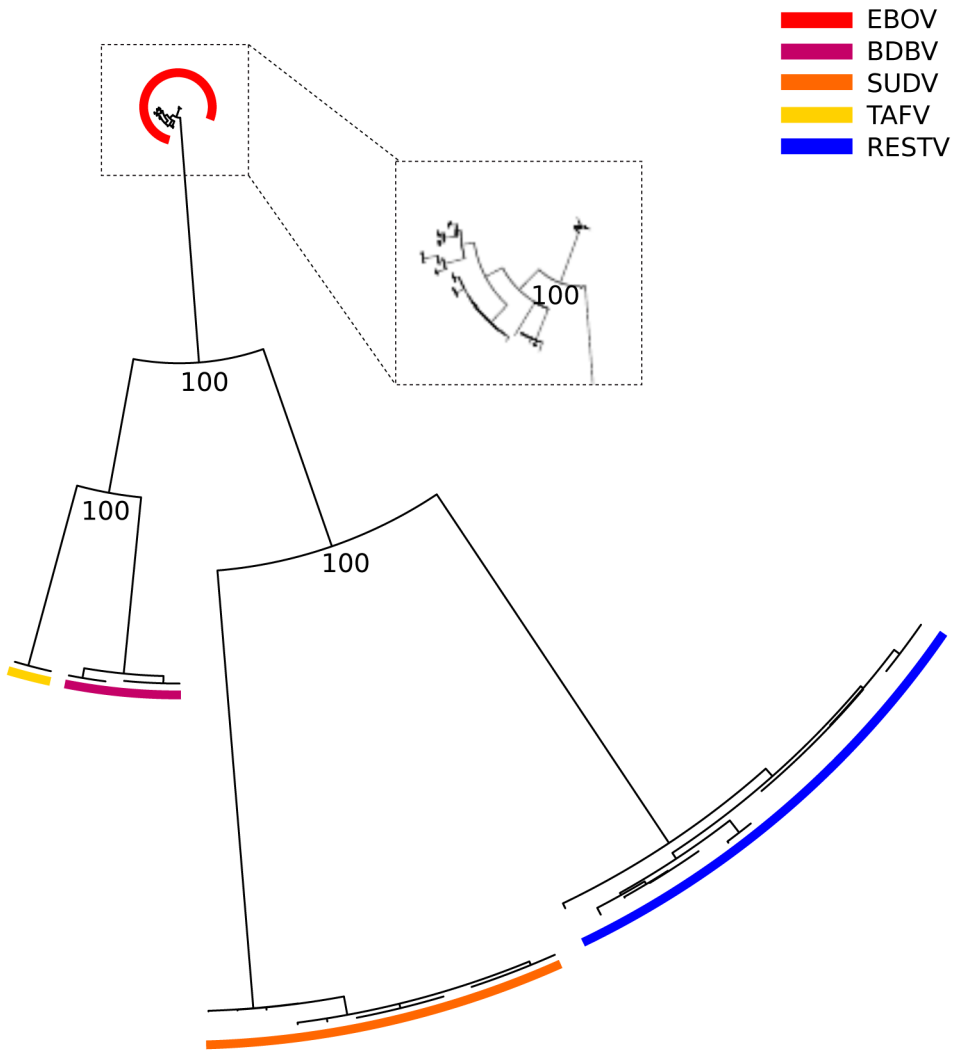

Fig S1D.

# GP

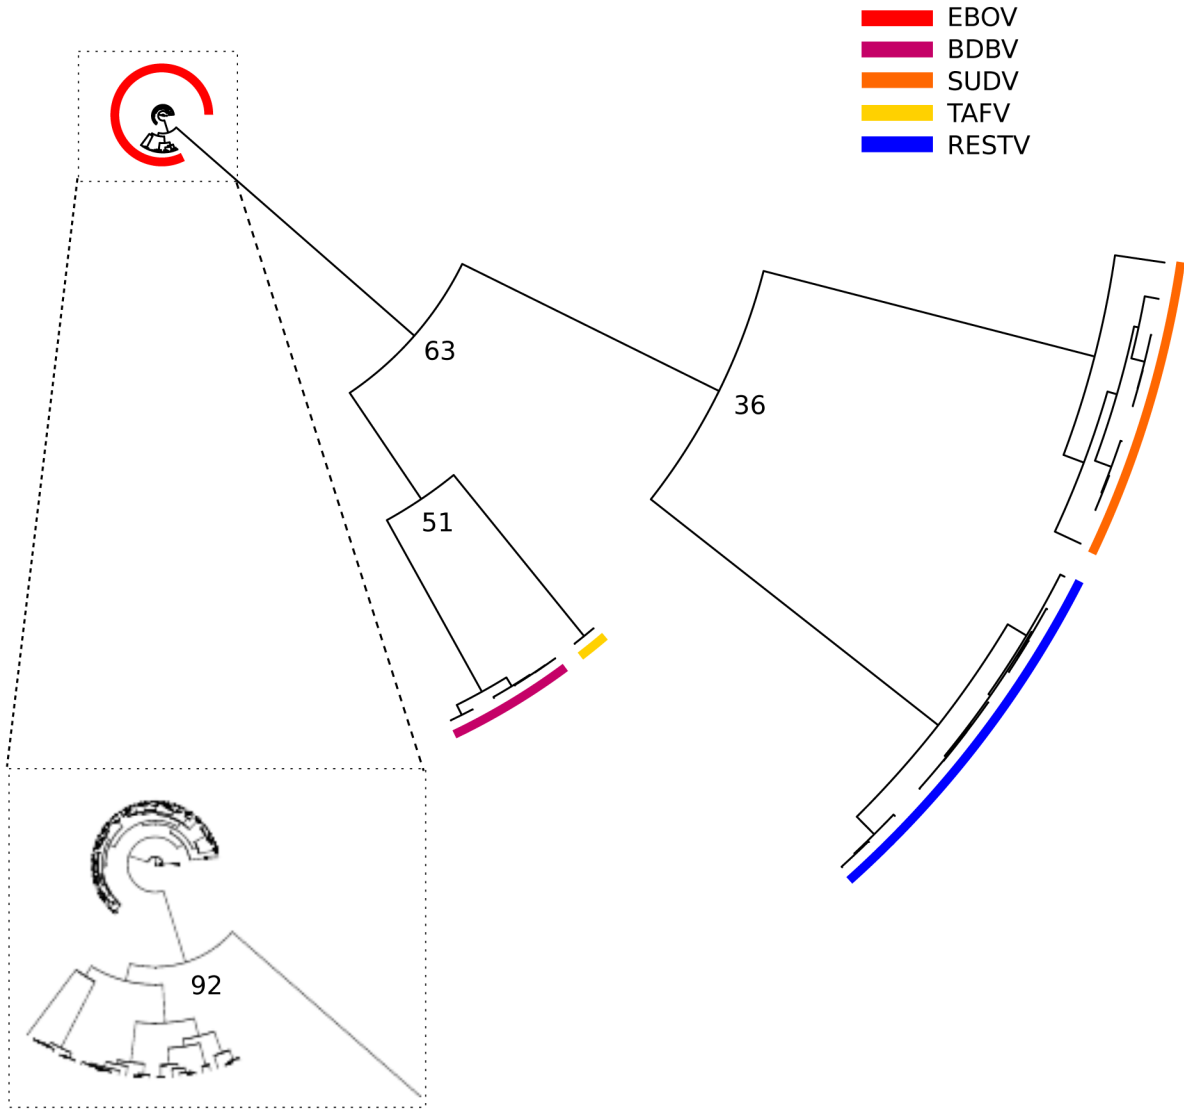

Fig S1E .



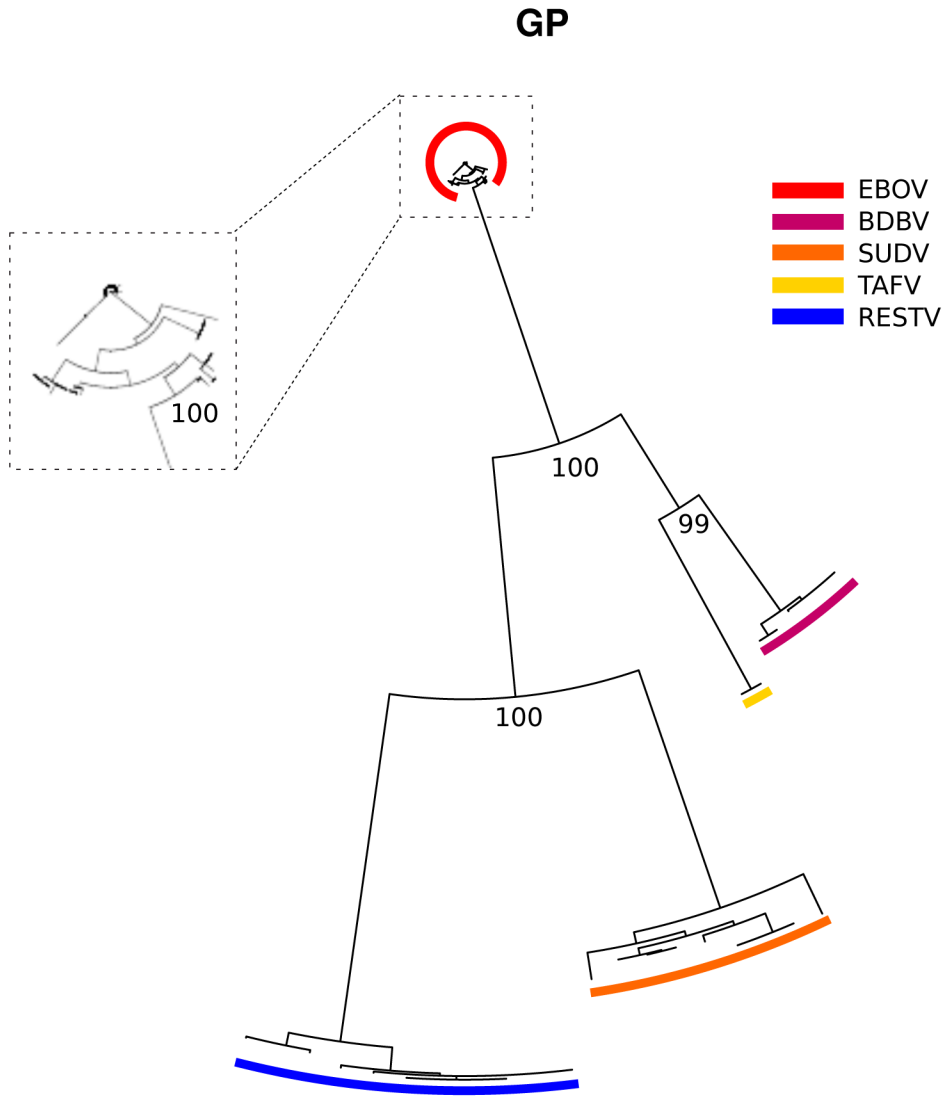

**Fig S1F.**

NP

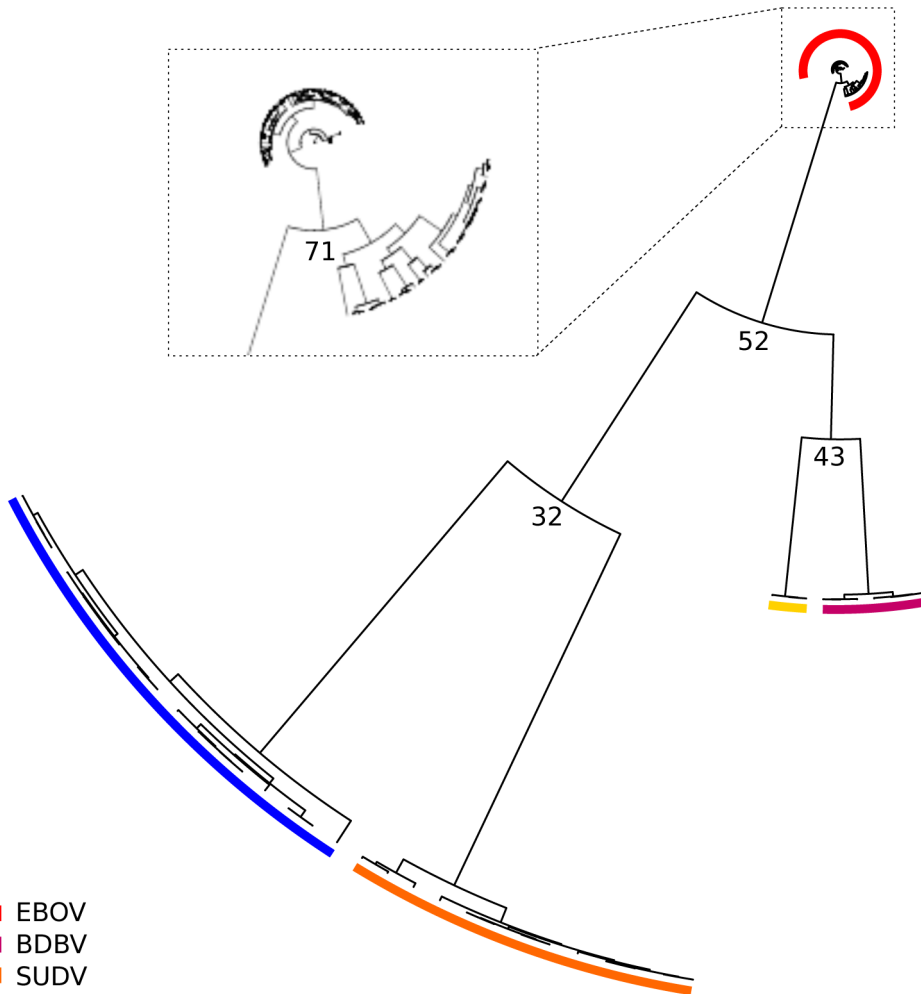

- EBOV
- BDBV
- SUDV
- TAFV
- RESTV

Fig S1G.

NP

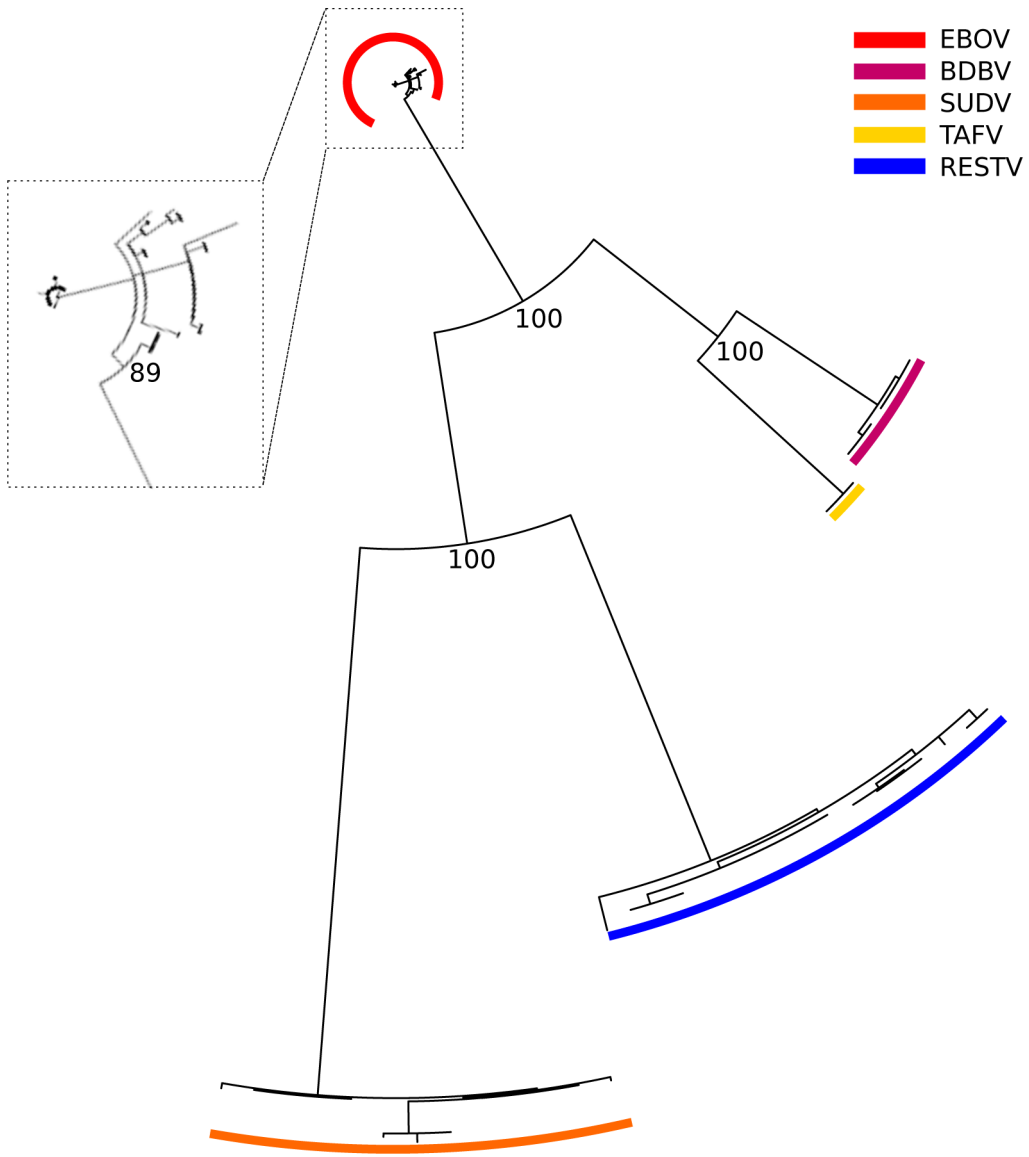

Fig S1H

# VP24

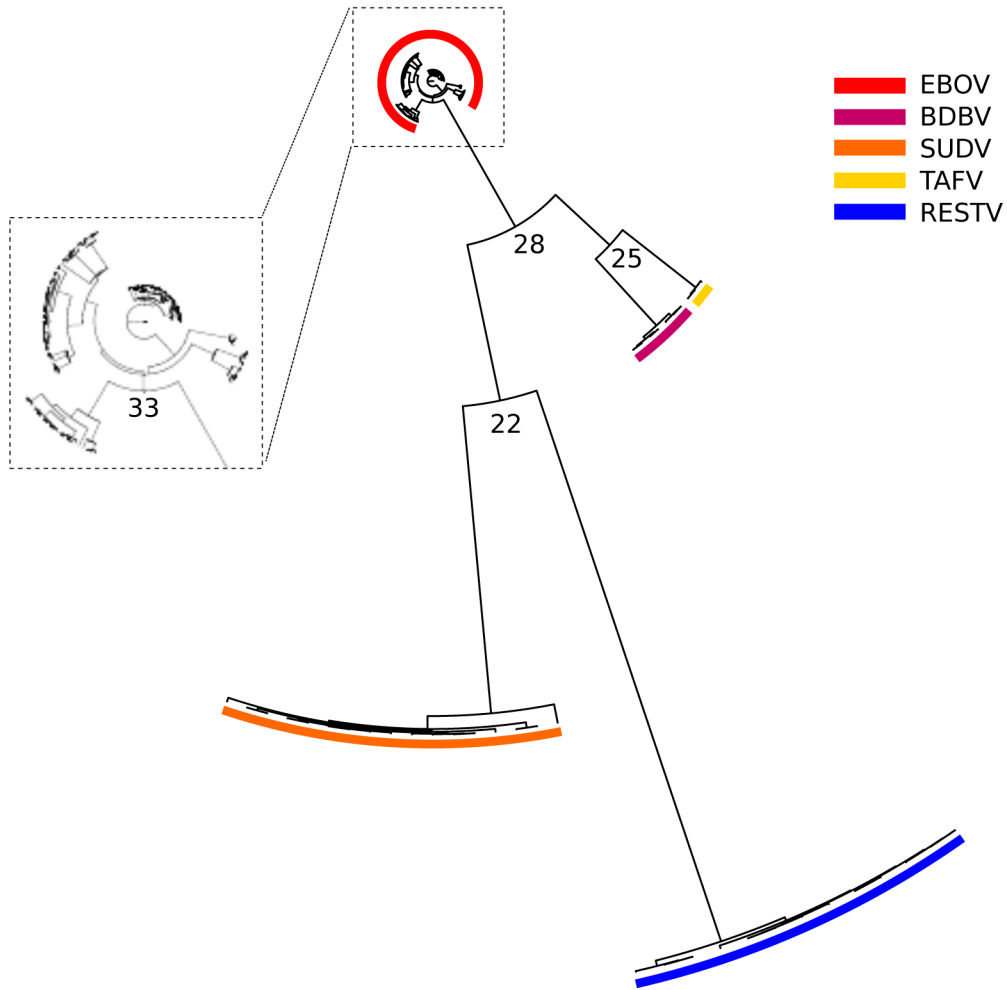

Fig S11.

# VP24

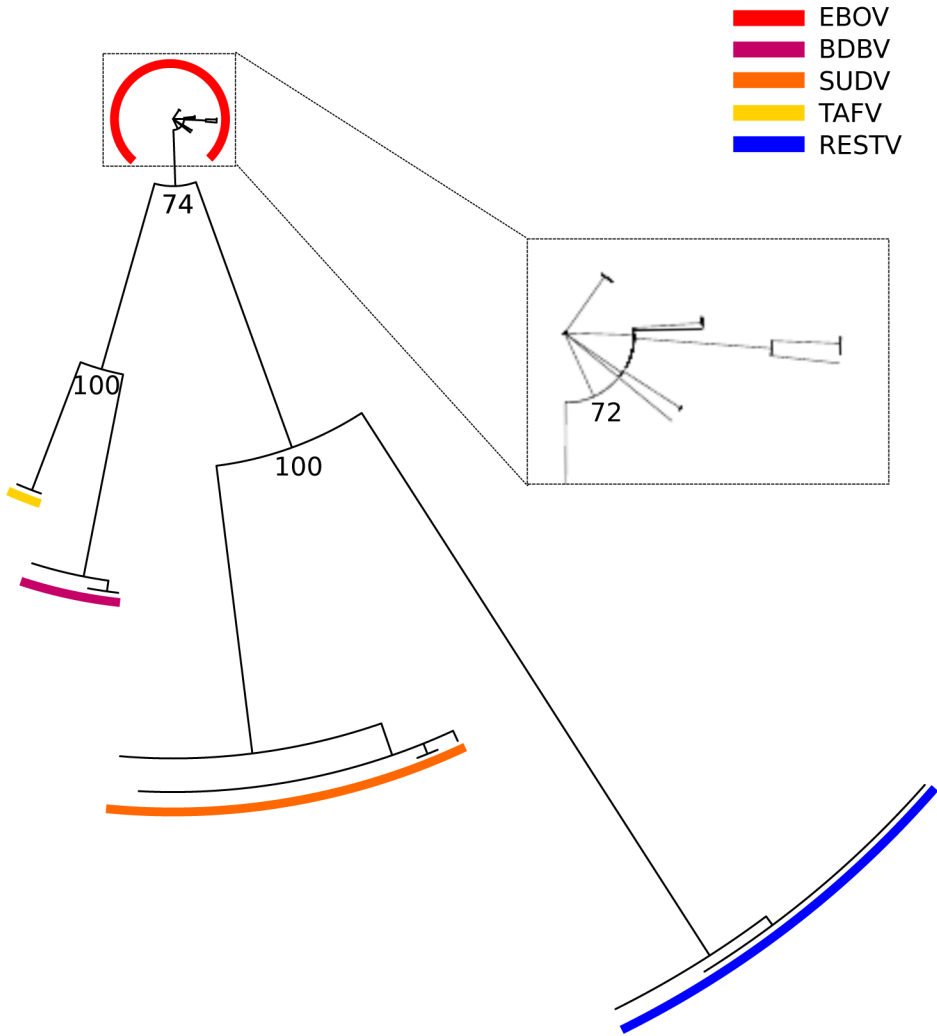

Fig S1J.

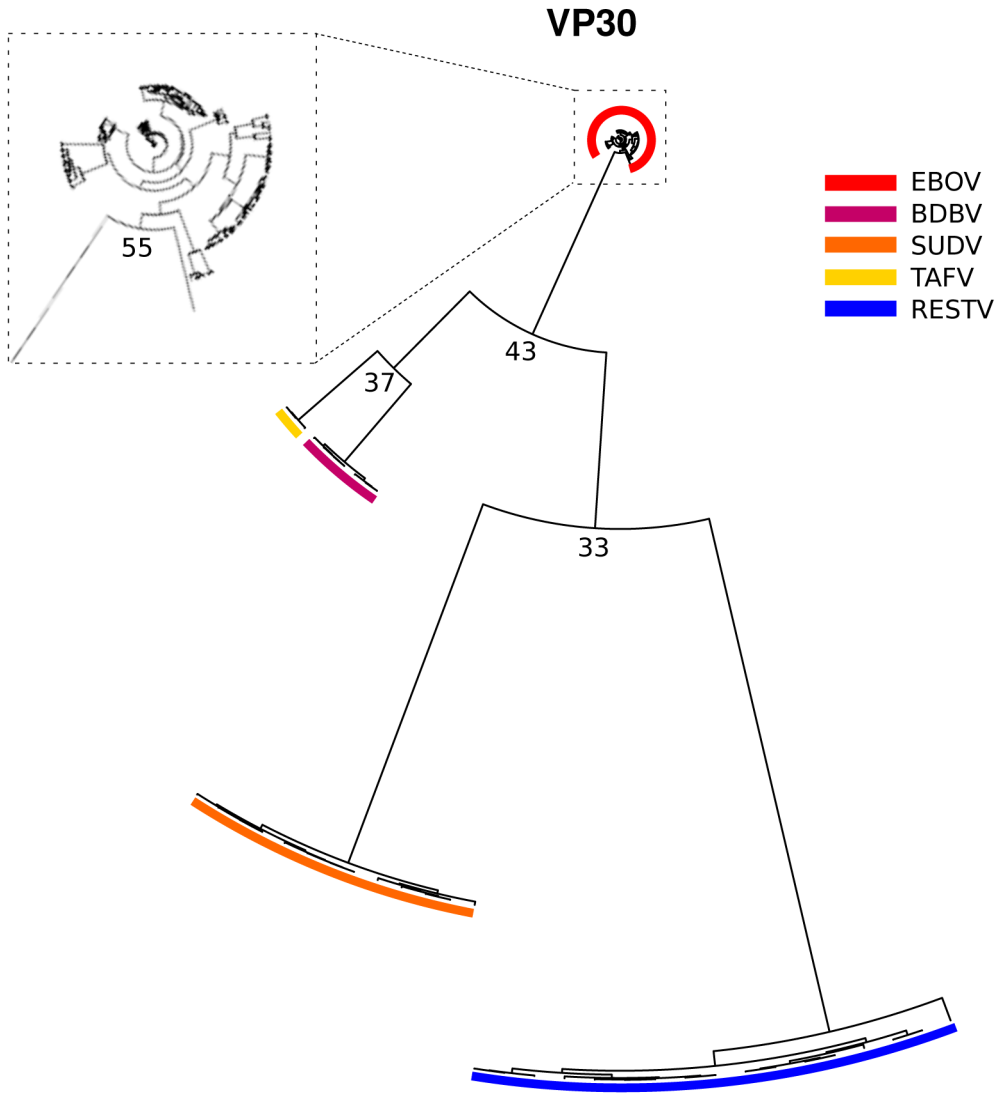

Fig S1K.

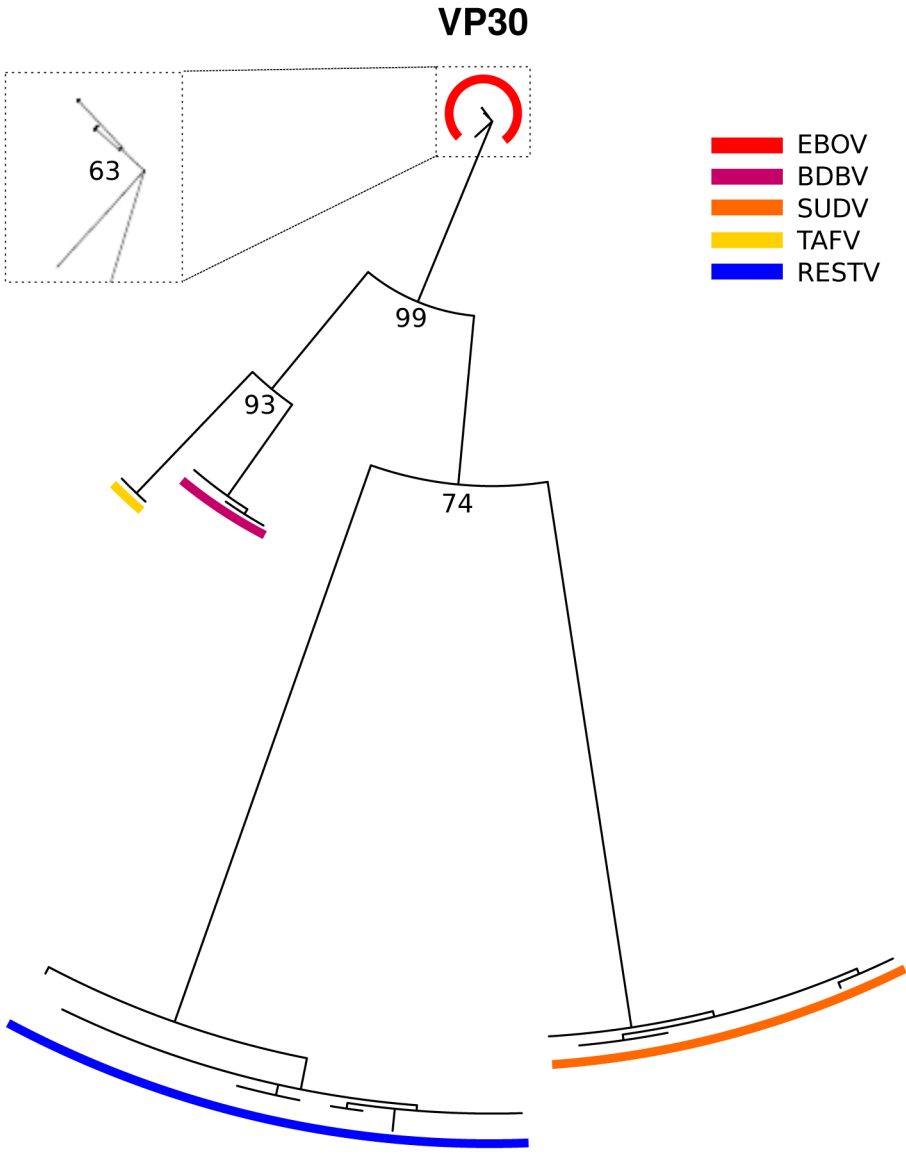

**Fig SIL**

# VP35

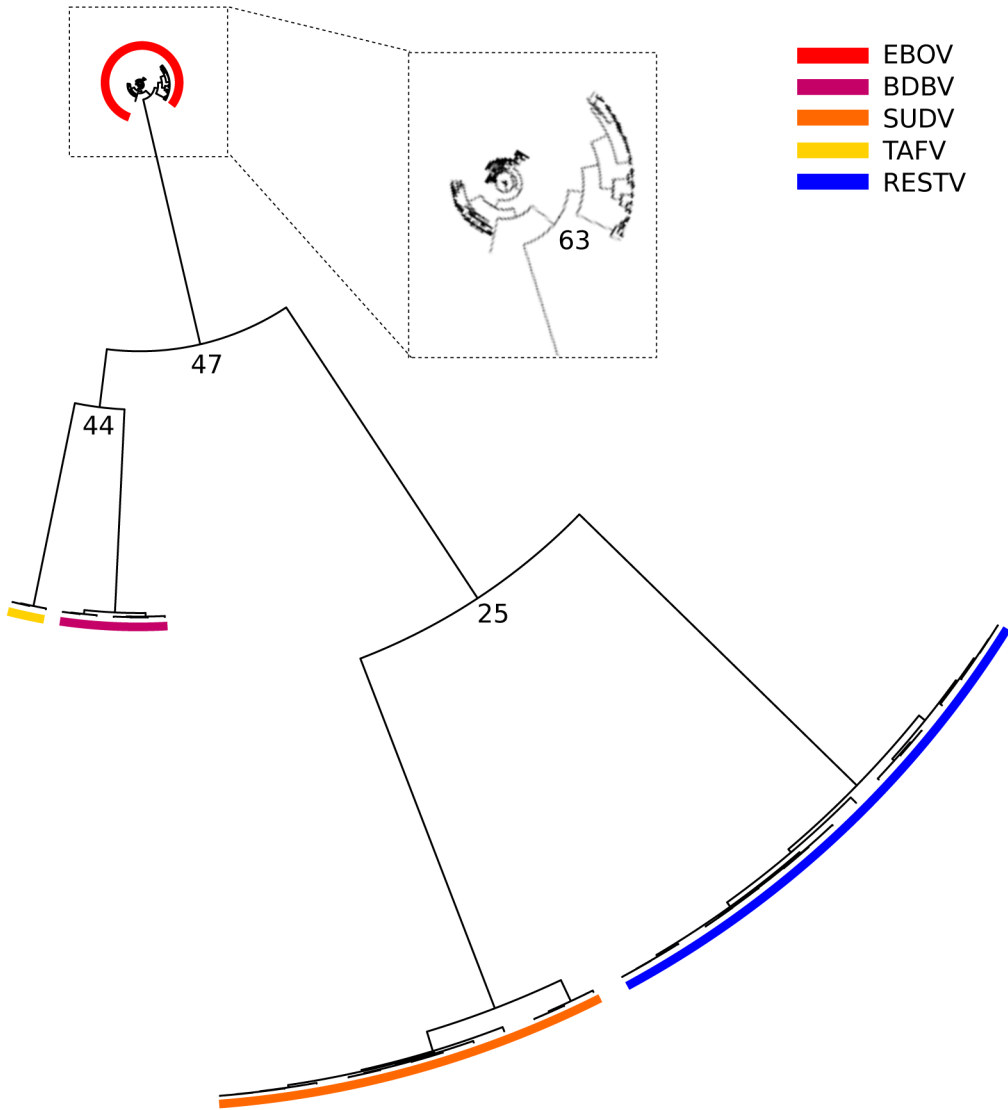

Fig S1M.



# VP35

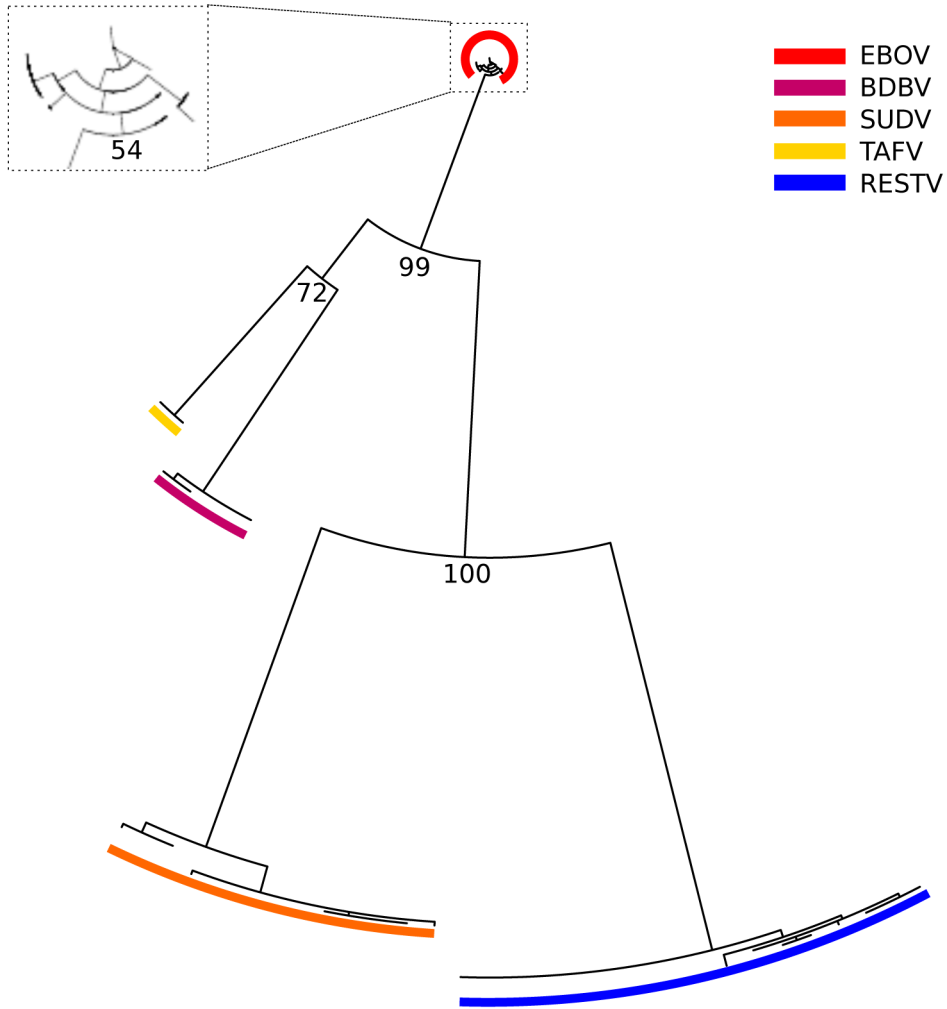

Fig S1N.

# VP40

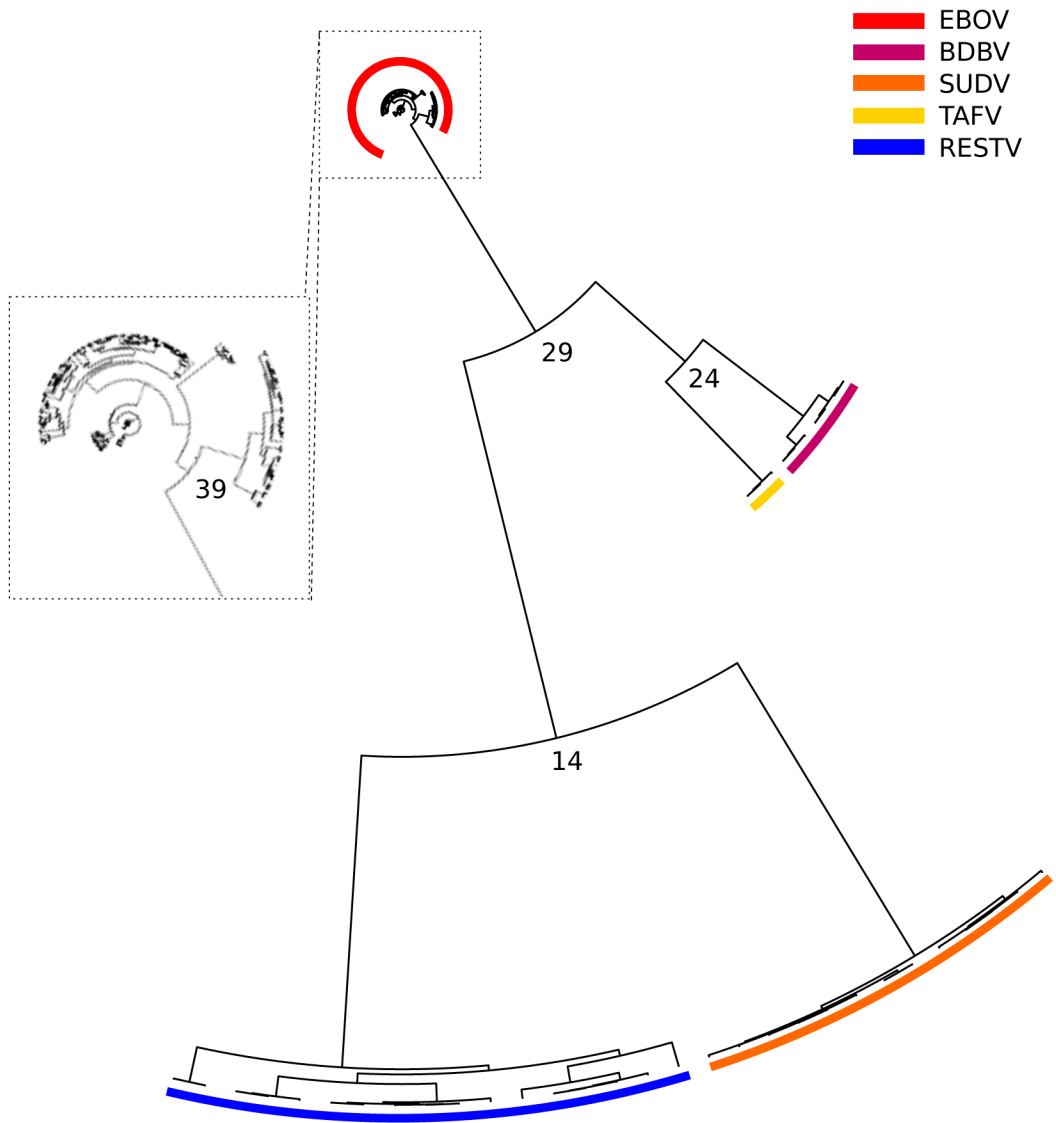

Fig S10.

# VP40

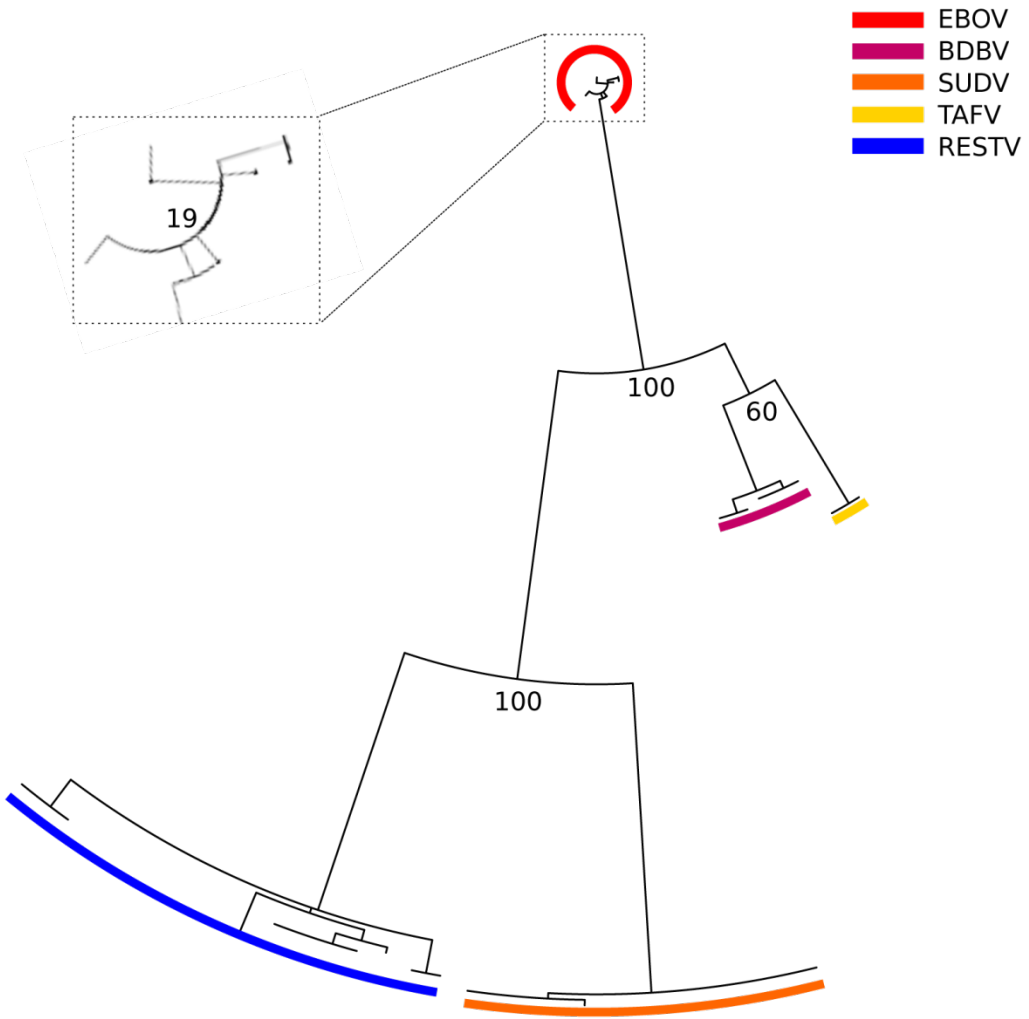

Fig S1P.



**B - GP**

10 20 30 40 50 60  
R MGSQYQLLQLPRERFRKTSFLVWVVIILFQRAISMPLGIVTNSTLKATEIDQLVCRDKLSS  
E -MGVTGILQLPRDRFRKTSFFLWVVIILFQRTFSIPLGVIHNSTLQVSDVDKLVCRDKLSS  
S -MGGLSLLQLPRDKFRKSSFFVWVVIILFQKAFSMPLGVVTNSTLEVTEIDQLVCKDHLAS  
B -MVTSGILQLPRERFRKTSFFVWVVIILFHKVFPPIPLGVVHNNTLQVSDIDKLVCRDKLSS  
T -MGASGILQLPRERFRKTSFFVWVVIILFHKVFSIPLGVVHNNTLQVSDIDKFVCRDKLSS

70 80 90 100 110 120  
R TSQ LKSVGLNLENGIATDVPSATKRWGFRSGVPPKVVSYEAGEWAENCYNLEIKKSDGS  
E TNQLRSVGLNLENGVATDVPSVTKRWGFRSGVPPKVVNYEAGEWAENCYNLEIKKPDGS  
S TDQLKSVGLNLESGVSTDI PSATKRWGFRSGVPPKVVSYEAGEWAENCYNLEIKKPDGS  
B TSQ LKSVGLNLENGVATDVPTATKRWGFRAGVPPKVVNYEAGEWAENCYNLDIKKADGS  
T TSQ LKSVGLNLENGVATDVPTATKRWGFRAGVPPKVVNCEAGEWAENCYNLAIKKVDGS

130 140 150 160 170 180  
R ECLPLPPDGVRGFPFCRYVHKVQGTGPCPGDLAFHKNGAFFLYDRLASTVIYRGTTFAEG  
E ECLPAAPDGIRGFPFCRYVHKVSGTGPCAGDFAFHKEGAFFLYDRLASTVIYRGTTFAEG  
S ECLPPPPDGVRGFPFCRYVHKAQGTGPCPGDYAFHKDGAFFLYDRLASTVIYRGVNFAEG  
B ECLPEAPEGVRGFPFCRYVHKVSGTGPCPEGFAFHKEGAFFLYDRLASTIIYRSTTFSEG  
T ECLPEAPEGVRDFPFCRYVHKVSGTGPCPGGLAFHKKEGAFFLYDRLASTIIYRGTTFAEG

190 200 210 220 230 240  
R VVAFLILSEPKKHFWKATPAHEPVNTTDDSTSYMTLTLSEMSNFGGEESENTLFKVDNH  
E VVAFLILPQAKKDFFSHPLREPVNATEDPSSGYSTTIRYQATGFGTNETEYLFEVDNL  
S VIAFLILAKPKETFLQSPPIREAVNYTENTSSYATSYLEYEIEENFGAQHSTTLFKIDNN  
B VVAFLILPKTKKDFQSPPLHEPANMTTDPSSYHTVTLNYVADNFGTNTMNFLLFQVDHL  
T VIAFLILPKARKDFQSPPLHEPANMTTDPSSYHTTTINYYVDNFGTNTTEFLFQVDHL

250 260 270 280 290 300  
R TYVQLDRPHTPQFLVQLNETLRRNRLSNSTGRLTWTLDPKIEPDVGEWAFWETKKNFSQ  
E TYVQLESRFTPQFLQLNETIYASGKRSNTTGKLIWKNPEIDTTIGEWAFWETKKNLTR  
S TFVRLDRPHTPQFLFQLNDTIHLHQQLSNTTGRLIWTLDANINADIGEWAFWENKKNLSE  
B TYVQLEPRFTPQFLVQLNETIYTNGRRSNTTGTLIWKVNPTVDTGVGEWAFWENKKNFTK  
T TYVQLEARFTPQFLVLLNETIYSDNRRSNTTGKLIWKINPTVDTSMGEWAFWENKKNFTK

310 320 330 340 350 360  
R QLHGENLHFQILSTHTNNSDQSPAGTVQGKISYHPPTNNSSELVPTDPPVVSVLTAGRT  
E KIRSEELSFTAVSNGPKNISGQSPARTSSDPETNTTNEDEHKIMASENSSAMVQVHSQGRK  
S QLRGEELSFEALSNETEDDDAASSRITKGRISDRATRKYSDLVPKNSPGMVPLHIPEGE  
B TLSSEELSIVILVPRAQDPGSNQTQKVTPTSFANNQTSKNHEDLVPKDPASVVQVRDLQRE  
T TLSSEELSFPVPETQNVLDTTATVSPPI SAHNHAAEDHKELVSEDSTPVVQMQNIKKG

370 380 390 400 410 420  
R EEMSTQGLTNGETI---TGFTANPMTTIIAPSPTMTSEVDNNVPSEQP---NNTASIED  
E AAVSHLTTLATISTSPQPPTTKTGPDNSTHNTVPYKLDISEATQVGQHRRADNDSTASD  
S TTLPSQNSTEGRRV---SVNTQETITETA---TIIGTNGNHMQISTIGIRPSSSQIPSS  
B NTVPTSPLNTVPTT-L-IPDTMEEQTTSHYELPNISGNHQERNNTAHPET-----LAN  
T DTMPTTVTGVPPTT-P-SPFPINARNTDHTKSFIGLEGPQEDHSTTQPAK-----TTS

430                    440                    450                    460                    470                    480  
 R S-----PPSASNETIDHSEMNSIQGSNNSAQSPQTKTTPAPTASP-----MTQDPQE  
 E T-----PPATTA-AGPLKAENTNTSKSAD-----SLDLATTTSPQNY-----ETA  
 S SPTTAPSPEAQTPTHHTSGPSVMATEE-PTTPPG-SSPGPTTEAP-----TLTTPEN  
 B N-----PPDNTPSTPPQ----DGERTSSHTTPSPRPVPTSTIHPPTRETQIPTTMITSH  
 T Q-----PTNSTESTLNP----TSEPSSRGTGPPSSPTVPNTTESHAELGKTTPTTLPEQH

490                    500                    510                    520                    530                    540  
 R TANSSKPGTSPGSAAEPSQPGLTINTVSKVADSLSPTRKQKRQKRSVRQNTANKCNPDLHYWT  
 E GNNNTHHQDTGEEASASSGKLGLITNTIAGVAGLITGGRTRREVIIVNAQPKCNPNLHYWT  
 S IT----TAVKTVLPQESTSNGLITSTVTGILGSLGLRKRQNTKATGKCNPNLHYWT  
 B DT--DSNRPNPIDISESTEPGLLTNTIRGVANLLTGSRRTRREITLRTQAKCNPNLHYWT  
 T TA--ASAI PRAVHPDELSGPGFLTNTIRGVTNLLTGSRRKRRDVTPTNTQPKCNPNLHYWT

550                    560                    570                    580                    590                    600  
 R AVDEGAAVGLAWIPYFGPAAEGIIYIEGVMHNQNGLICGLRQLANETTQALQLFLRATTEL  
 E TQDEGAAIGLAWIPYFGPAAEGIIYTEGLMHNQDGLICGLRQLANETTQALQLFLRATTEL  
 S AQEQHNAAGIAWIPYFGPAAEGIIYTEGLMHNQNALVCGLRQLANETTQALQLFLRATTEL  
 B TQDEGAAIGLAWIPYFGPAAEGIIYTEGIMHNQNGLICGLRQLANETTQALQLFLRATTEL  
 T ALDEGAAIGLAWIPYFGPAAEGIIYTEGIMENQNGLICGLRQLANETTQALQLFLRATTEL

610                    620                    630                    640                    650                    660  
 R RTYSLLNRKAIDFLLQRWGGTTCRILGPSCCIEPHDWTKNITDEINQIKHDFIDNPLPDHG  
 E RTFSILNRKAIDFLLQRWGGTCHILGPDCCIEPHDWTKNITDKIDQIIHDFVDKTLPDQG  
 S RYTYILNRKAIDFLLRRWGGTTCRILGPDCCIEPHDWTKNITDKINQIIHDFIDNPLPNQD  
 B RTFSILNRKAIDFLLQRWGGTCHILGPDCCIEPHDWTKNITDKIDQIIHDFIDKPLPDQT  
 T RTFSILNRKAIDFLLQRWGGTCHILGPDCCIEPQDWTKNITDKIDQIIHDFVDNPLPNQN

670                    680                    690  
 R DDLNLWTGWRQWIPAGIGIIGVIIAIIALLCICKILC  
 E DNDNWWTGWRQWIPAGIGVTGVIIAVIALFCICKFVF  
 S NDDNWWTGWRQWIPAGIGITGVIIAIIALLCVCKLLC  
 B DNDNWWTGWRQWVPAGIGITGVIIAVIALLCICKFLL  
 T DGSNWWTGWKQWVPAGIGITGVIIAIIALLCICKFML

C - VP40

10 20 30 40 50 60  
R MRRGVLPTAPPAYNDIAYPMSILPTRPSVIVNETKSDVLAVPGADVPSNSMRPVADDNID  
E MRRVILPTAPPEYMEAIYPARSNSTIARGGNSNTGFLTPEVNGDTPSNPLRPIADDTID  
S MRRVTVPTAPPAYADIGYPMSMLPIKSSRAVSGIQQKQEVLPGMDTPSNNSMRPVADDNID  
B MRRAILPTAPPEYMEAVYPMRTVSTNISSTSSGPNFPAPDVMMSDTPSNSLRPIADDNID  
T MRRILPTAPPEYMEAVYPMRTMNSGADNTASGPNYTTTGVMTNDTPSNSLRPVADDNID

70 80 90 100 110 120  
R HSSHTPSGVASAFILEATVNVISGTKVLMKQIPIWLPLGVADQKIYSFDSTTAAIMLASY  
E HASHTPGSVSSAFILEAMVNVISGPKVLMKQIPIWLPLGVADQKTYSFDSTTAAIMLASY  
S HTSHTPNGVASAFILEATVNVISGPKVLMKQIPIWLPLGIADQKTYSFDSTTAAIMLASY  
B HPSHTPTS SVSSAFILEAMVNVISGPKVLMKQIPIWLPLGVADQKTYSFDSTTAAIMLASY  
T HPSHTPNSVASAFILEAMVNVISGPKVLMKQIPIWLPLGVSDQKTYSFDSTTAAIMLASY

130 140 150 160 170 180  
R TVTHFGKISNPLVRVNRLGPGIPDHPLRLLRIGNQAFLEFVLPVQLPQYFTFDLTALK  
E TITHFGKATNPLVRVNRLGPGIPDHPLRLLRIGNQAFLEFVLPVQLPQYFTFDLTALK  
S TITHFGKANNPLVRVNRLGQGIPDHPLRLLRMGNQAFLEFVLPVQLPQYFTFDLTALK  
B TITHFGKTSNPLVRINRLGPGIPDHPLRLLRIGNQAFLEFVLPVQLPQYFTFDLTALK  
T TITHFGKTSNPLVRINRLGPGIPDHPLRLLRIGNQAFLEFVLPVQLPQYFTFDLTALK

190 200 210 220 230 240  
R LITQPLPAATWTDETPAGAVNALRPGLSLHFKLRPILLPGKTGKKGHASDLTSPDKIQTI  
E LITQPLPAATWTDDTPTGNSGALRPGISFHPKLRPILLPNKSGKKGNSADLTSPEKIQAI  
S LVTQPLPAATWTDETPSNLSGALRPGLSFHPKLRPVLLPGKTGKKGHVSDLTAPDKIQTI  
B LITQPLPAATWTDDTPTGPTGILRPGISFHPKLRPILLPGKTGKRGSSDLTSPDKIQAI  
T LITQPLPAATWTDETPAVSTGTLRPGISFHPKLRPILLPGRAGKKGNSDLTSPDKIQAI

250 260 270 280 290 300  
R MNAIPDLKIVPIDPTKNIVGIEVPELLVQRLTGKKQPKNQPIIPVLLPKYVGLDPISP  
E MTSLQDFKIVPIDPTKNIMGIEVPETLVHKLTKGKVTSKNGQPIIPVLLPKYIGLDPVAP  
S VNLMQDFKIVPIDPAKSIIGIEVPELLVHKLTKGKMSQKNGQPIIPVLLPKYIGLDPISP  
B MNFLQDLKIVPIDPAKNIMGIEVPELLVHRLTGKKITTKNGQPIIPILLPKYIGMDPISQ  
T MNFLQDLKIVPIDPTKNIMGIEVPELLVHRLTGKKTITTKNGQPIIPILLPKYIGLDPISQ

310 320 330  
R GDLMVITQDCDSCHSPASHPYHMDKQNSYQ  
E GDLMVITQDCDTCHSPASLPAVVEK-----  
S GDLMVITPDYDDCHSPASCSYLSEK-----  
B GDLMVITQDCDTCHSPASLPPVSEK-----  
T GDLMVITQDCDSCHSPASLPPVNEK-----

D - VP35

1 10 20 30 40 50 60  
R-----MYNNKLVCSGPE TTGWISEQLMTGKIPVTDIFIDIDNKPDQMEVRLK  
E-MTTRTKGRGHTVATTQNDRMPGPELSGWISEQLMTGRIPVNDIFCDIENNPGLCYASQM  
S-----MQQDRTYRHHGPEVSGWVSEQLMTGKIPLTEVFVDVENKPSAPITII  
BMTSNRARVTYNPPPTTTGTRSCGPELSGWISEQLMTGKIPITDIFNEIETLPSISPSIHS  
T MISTRAAAINDPSLPIRNQCTRGPELSGWISEQLMTGKIPVHEIFNDTEPHISSGSDCLP

70 80 90 100 110 120  
R P S S R S S T R T C T S S S Q T E V N Y V P L L K K V E D T L T M L V N A T S R Q N A A I E A L E N R L S T L E S S L K  
E Q Q T K P N P K M R N S Q T Q T D P I C N H S F E E V V Q T L A S L A T V V Q Q Q T I A S E S L E Q R I T S L E N G L K  
S S K N P K T T R K S D K Q V Q T D D A S L L T E E V K A A I N S V I S A V R R Q T N A I E S L E G R V T T L E A S L K  
B K I K T P S V Q T R S V Q T Q T D P N C N H D F A E V V K M L T S L T L V V Q K Q T L A T E S L E Q R I T D L E G S L K  
T R P K N T A P R T R N T Q T Q T D P V C N H N F E D V T Q A L T S L T N V I Q K Q A L N L E S L E Q R I I D L E N G L K

130 140 150 160 170 180  
R P I Q D M G K V I S S L N R S C A E M V A K Y D L L V M T T G R A T S T A A A V D A Y W K E H K Q P P P G P A L Y E E N  
E P V Y D M A K T I S S L N R V C A E M V A K Y D L L V M T T G R A T A T A A A T E A Y W A E H G Q P P P G P S L Y E E S  
S P V Q D M A K T I S S L N R S C A E M V A K Y D L L V M T T G R A T A T A A A T E A Y W N E H G Q A P P G P S L Y E D D  
B P V S E I T K I V S A L N R S C A E M V A K Y D L L V M T T G R A T A T A A A T E A Y W A E H G R P P P G P S L Y E E D  
T P M Y D M A K V I S A L N R S C A E M V A K Y D L L V M T T G R A T A T A A A T E A Y W E E H G Q P P P G P S L Y E E S

190 200 210 220 230 240  
R A L K G K I D D P N S Y V P D A V Q E A Y K N L D S T S T L T E E N F G K P Y I S A K D L K E I M Y D H L P G F G T A F  
E A I R G K I E S R D E T V P Q S V R E A F N N L D S T S L T E E N F G K P D I S A K D L R N I M Y D H L P G F G T A F  
S A I K A K L K D P N G K V P E S V K Q A Y T N L D S T S A L N E E N F G R P Y I S A K D L K E I I Y D H L P G F G T A F  
B A I R T K I E K Q G D I V P K E V Q E A F R N L D S T A L L T E E N F G K P D I S A K D L R N I M Y D H L P G F G T A F  
T A I R G K I N K Q E D K V P K E V Q E A F R N L D S T S S L T E E N F G K P D I S A K D L R D I M Y D H L P G F G T A F

250 260 270 280 290 300  
R H Q L V Q V I C K I G K D N N L L D T I H A E F Q A S L A D G D S P Q C A L I Q I T K R V P I F Q D V P P P I I H I R S  
E H Q L V Q V I C K L G K D S N S L D I I H A E F Q A S L A E G D S P Q C A L I Q I T K R V P I F Q D A A P P V I H I R S  
S H Q L V Q V I C K I G K D N N I L D I I H A E F Q A S L A E G D S P Q C A L I Q I T K R I P A F Q D A S P P I V H I K S  
B H Q L V Q V I C K L G K D N S S L D V I H A E F Q A S L A E G D S P Q C A L I Q I T K R I P I F Q D A A P P V I H I R S  
T H Q L V Q V I C K L G K D N S A L D I I H A E F Q A S L A E G D S P Q C A L I Q I T K R I P I F Q D A T P P T I H I R S

310 320 330 340  
R R G D I P R A C Q K S L R P A P P S P K I D R G W V C L F K M Q D G K T L G L K I  
E R G D I P R A C Q K S L R P V P P S P K I D R G W V C V F Q L Q D G K T L G L K I  
S R G D I P K A C Q K S L R P V P P S P K I D R G W V C I F Q F Q D G K A L G L K I  
B R G D I P K A C Q K S L R P V P P S P K I D R G W V C I F Q L Q D G K T L G L K I  
T R G D I P R A C Q K S L R P V P P S P K I D R G W V C I F Q L Q D G K T L G L K I



E - VP30

1 10 20 30 40 50 60  
R MMEHSRERGRSSNMRHNSREPYENPSRSRSLSRDPNQVDRRQPRSASQIRVPNLFHRKKT  
E -MEASYERGRPRAARQHSRDGHDHVRARSSSRENYRGEYRQSRASQVRVPTVFHKKRV  
S -MERGRERGRSRNSRADQQNSTGPFQFRTRISIRDKTTTDYRSSRSTSQVRVPTVFHKKGT  
B -MDSFHERGRSRTIRQSARDGPSHQVTRSSSRSDSHRSEYHTPRSSSQVRVPTVFHHRKRT  
T -MEVVHERGRSRI SRQNTRDGP SHLVRARSSSRASYRSEYHTPRASASQIRVPTVFHHRKKT

70 80 90 100 110 120  
R DALIVPPAPKDICPTLKKGF L CDSKFCKKDHQLDSLNDHEL L LLIARRTC G IIESNSQIT  
E EPLTVPPAPKDICPTLKKGF L CDSKFCKKDHQLES L TDRELL L LIAR KTCGSVEQQLNIT  
S GTLTVPPAPKDICPTLRKGF L CDSNFCKKDHQLES L TDRELL L LIAR KTCGSTDSSLNIA  
B DFLTVP P PAKDICPTLRKGF L CDSNFCKKDHQLES L TDRELL L LIAR KTCGSLEQQLNIT  
T DLLTVPPAPKDVCP T LKKGF L CDSNFCKKDHQLES L TDRELL L LIAR KTCGSTEQQLSIV

130 140 150 160 170 180  
R SPKDMRLANPTAEDFSQGN SPKLT L AVL L LQIAEHWATRD L RQIEDSKLRALL T LCAVLTR  
E APKDSRLANPTADDFQ QEEGPKIT L L T L I K TAEHWARQDIRTIEDSKLRALL T LCAVMTR  
S APKDLRLANPTADDFKQDGSPKLT L K L L VETA EFWANQ NINEVDDAKLRALL T LSAVLVR  
B APK DTRLANPIADDFQ QKDGPKIT L L T L L E TAEYWSKQDIK GIDDSRLRALL T LCAVMTR  
T APKDSRLANPIAEDFQ QKDGPKV T L SMLIETAEYWSKQDIKNIDDSRLRALL T LCAVMTR

190 200 210 220 230 240  
R KFSKSQLGLLCETHLRHEGLGQDQADSVLEVYQRLHSDKGGNF EAALWQQWDRQSLIMFI  
E KFSKSQLSLLCETHLRREGLGQDQAEVLEVYQRLHSDKGGSF EAALWQQWDRQSLIMFI  
S KFSKSQLSLLCETHLRREN LGQDQAE SVLEVYQRLHSDKGGAF EAALWQQWDRQSLTMFI  
B KFSKSQLSLLCETHLRREGLGQDQSESVLEVYQRLHSDKGGNF EAALWQQWDRQSLIMFI  
T KFSKSQLSLLCETHLRREGLGQDQSESVLEVYQRLHSDKGGNF EAALWQQWDRQSLIMFI

250 260 270 280 290  
R SAFLNIALQIPCESSSVVSGLATLYPAQDNSTPSEATNDTTWSSTVE--  
E TAFLNIALQLPCESSAVVSGLR TLVPQSDNEEASTNPGTCSWSDEGTP-  
S SAFLHVALQLSCESSTVVISGLRLLAPPSVNEGLPPAPGEYTWSEDSTT-  
B TAFLNIALQLPCESSSVVISGLRLLVPQSEDTETSTYTETRAWSEEGGPH  
T TAFLNIALQLPCESSSVVISGLRMLIPQSEATEVVT PSETCTWSEGGSSH

F - sGP

10 20 30 40 50 60  
R-----MGSGYQLLQLPRERF  
E-----MGVTGILQLPRDRF  
S-----MGGLSLLQLPRDKF  
B-----MVTSGILQLPRERF  
T-----MGASGILQLPRERF

70 80 90 100 110 120  
R RKTSFLVWVIILFQRAISMPLGIVTNSTLKATEIDQLVCRDKLSSTS QLKSVGLNLEGN  
E KRTSFFLWVIILFQRTFSIPLGVIHNSTLQVSDVDKLVCRDKLSSTNQLRSVGLNLEGN  
S RKSSFFVWVIILFQKAFSMPLGVVTNSTLEVTEIDQLVCKDHLASTDQLKSVGLNLEGS  
B RKTSFFVWVIILFHKVFPIPLGVVHNNTLQVSDIDKLVCRDKLSSTS QLKSVGLNLEGN  
T RKTSFFVWVIILFHKVFSIPLGVVHNNTLQVSDIDKFVCRDKLSSTS QLKSVGLNLEGN

130 140 150 160 170 180  
R IATDVPSATKRWGFRRSGVPPKVVSYEAGEWAENCYNLEIKKSDGSECLPLPPDGVRGFPR  
E VATDVPSVTKRWGFRRSGVPPKVVNYEAGEWAENCYNLEIKKPDGSECLPAAPDGIRGFPR  
S VSTDIPSATKRWGFRRSGVPPKVVSYEAGEWAENCYNLEIKKPDGSECLPPPPDGVRGFPR  
B VATDVPTATKRWGFRRAGVPPKVVNYEAGEWAENCYNLDIKKADGSECLPEAPEGVRGFPR  
T VATDVPTATKRWGFRRAGVPPKVVNCEAGEWAENCYNLAIKKVDGSECLPEAPEGVRDFPR

190 200 210 220 230 240  
R CRYVHKVQGTGPCPGDLAFHKNGAFFLYDRLASTVIYRGTTFAEGVVAFLILSEPKKHF  
E CRYVHKVSGTGPCAGDFAFHKEGAFGLYDRLASTVIYRGTTFAEGVVAFLILPQAKKDF  
S CRYVHKAQGTGPCPGDYAFHKDGAFFLYDRLASTVIYRGVNFAEGVIAFLILAKPKETFL  
B CRYVHKVSGTGPCPEGYAFHKEGAFGLYDRLASTIIYRSTTFSEGVVAFLILPETKKDF  
T CRYVHKVSGTGPCPGGLAFHKEGAFGLYDRLASTIIYRGTTFAEGVIAFLILPKARKDF

250 260 270 280 290 300  
R KATPAHEPVNTTDDSTSYMTLTLSEYMSNFGGEESENTLTKVDNHTYVQLDRPHTPQFLV  
E SSHPLREPVNATEDPSSGYSTTIRYQATGFGTNETEYLFEVDNLTIVQLESRFTPQFL  
S QSPPIREAVNYTENTSSYYATSYLEYEIENFGAQHSTTLFKIDNNTFVRLDRPHTPQFL  
B QSPPLHEPANMTTDPSSYYHTVTLNYVADNFGTNTNLFQVDHLTYVQLEPRFTPQFL  
T QSPPLHEPANMTTDPSSYYHTTTINYVDNFGTNTTEFLFQVDHLTYVQLEARFTPQFLV

310 320 330 340 350 360  
R QLNELRRNRLSNSTGRLTWTLDPKIEPDVGEWAFWETKKTFFPNNFMEKTCISKFYQPT  
E QLNETIYASGKRSNTTGKLIWKNPEIDTTIGEWAFWETKKTSLKFAVKSCLSQLYQT-  
S QLNDTIHLHQQLSNTTGRLIWTLDANINADIGEWAFWENKKISPNNYVEKSCLSKLYRST  
B QLNETIYTNGRRSNTTGTLIWKVNPTVDTGVGEWAFWENKKTSONPFQ--S--S-----  
T LLNETIYSDNRRSNTTGKLIWKINPTVDTSMGEWAFWENKKTHTQNPFO-----

370 380 390 400 410 420  
R PTPQIRARRELSKEKLATTHPPTTPSWFQRIPLQWFQCSLQDGQRKCRPKV-----  
E PKTSVVRVRRELLPTQ-PTQQ-KTTKSWLQKIPLQWFKCTVKEGKLQCRI-----  
S RQKTMMRHRRELQREESPTGPPGSIRTWFQRIPLGWFHCTYQKQKQHCLRLRIRQKVEE--  
B ---AA-----S---AS-----F-----F----S-----H----S-----  
T-----

G - NP

10 20 30 40 50 60  
R MDRGTRRIWVSNQGD TDL DYHKILTAGLTVQQGIVRQKIISVYLVNDLEAMCQLVIQAF  
E MDSRPQKVWMTPSL TESDM DYHKILTAGLSVQQGIVRQRVIPVYQVNNLEEICQLIIQAF  
S MDKRVRGSWALGGQSEVDLDYHKILTAGLSVQQGIVRQRVIPVYVVS DLEGICQHIIQAF  
B MDP RPPIRTWMMHNTSEVEADYHKILTAGLSVQQGIVRQR IIPVYQISNLEEV CQLIIQAF  
T MESRAHKAWMTH TASGFETDYHKILTAGLSVQQGIVRQRVIQVHQVTNLEEICQLIIQAF

70 80 90 100 110 120  
R EAGIDFQENADS FLLMLCLH HAYQGDYKLFLESNAVQYLEGHGFKFELRKKDGVNRLEEL  
E EAGVDFQESADS FLLMLCLH HAYQGDYKLFLES GAVKYLEGHGFRFEVKKCDGVKRLEEL  
S EAGVDFQDNADS FLLLCLH HAYQGDHRLFLKSDAVQYLEGHGFRFEVREKENVHRLDEL  
B EAGVDFQDSADS FLLMLCLH HAYQGDYKQFLESNAVKYLEGHGFRFEMKKKEGVKRLEEL  
T EAGVDFQESADS FLLMLCLH HAYQGDYKQFLESNAVKYLEGHGFRFEVRKKEGVKRLEEL

130 140 150 160 170 180  
R LPAATSGKNIRRTLAALPEEETTEANAGQFLSFASLFLPKLVVGEKACLEKVQRQIQVHA  
E LPAVSSGRNIKRTLAAMPEEETTEANAGQFLSFASLFLPKLVVGEKACLEKVQRQIQVHA  
S LPNVTGGKNLRRTLAAMPEEETTEANAGQFLSFASLFLPKLVVGEKACLEKVQRQIQVHA  
B LPAASSGKNIKRTLAAMPEEETTEANAGQFLSFASLFLPKLVVGEKACLEKVQRQIQVHA  
T LPAASSGKSIRRTLAAMPEEETTEANAGQFLSFASLFLPKLVVGEKACLEKVQRQIQVHS

190 200 210 220 230 240  
R EQGLIQYPTAWQSVGHMMVIFRLMRTNFLIKYLLIHQGMH MVAGHDANDAVIANSVAQAR  
E EQGLIQYPTAWQSVGHMMVIFRLMRTNFLIKFLLIHQGMH MVAGHDANDAVISNSVAQAR  
S EQGLIQYPTSWQSVGHMMVIFRLMRTNFLIKFLLIHQGMH MVAGHDANDTVISNSVAQAR  
B EQGLIQYPTSWQSVGHMMVIFRLMRTNFLIKFLLIHQGMH MVAGHDANDAVIANSVAQAR  
T EQGLIQYPTAWQSVGHMMVIFRLMRTNFLIKFLLIHQGMH MVAGHDANDAVIANSVAQAR

250 260 270 280 290 300  
R FSGLLIVKTVLDHILQKTDQGVRLHPLARTAKVRNEVNAFKAALSSLAKHG EYAPFARLL  
E FSGLLIVKTVLDHILQKTERGVRLHPLARTAKVKNEVNSFKAALSSLAKHG EYAPFARLL  
S FSGLLIVKTVLDHILQKTDLGVRLHPLARTAKVKNEVSSFKAALGSLAKHG EYAPFARLL  
B FSGLLIVKTVLDHILQKTEHGVRLHPLARTAKVKNEVSSFKAALASLAQHGEYAPFARLL  
T FSGLLIVKTVLDHILQKTEHGVRLHPLARTAKVKNEVNSFKAALSSLAQHG EYAPFARLL

310 320 330 340 350 360  
R NLSGVNNLEHGLYPQLSAIALGVATAHGSTLAGVNVGEQYQQLREAAATEAEKQLQQYAES  
E NLSGVNNLEHGLFPQLSAIALGVATAHGSTLAGVNVGEQYQQLREAAATEAEKQLQQYAES  
S NLSGVNNLEHGLYPQLSAIALGVATAHGSTLAGVNVGEQYQQLREAAATEAEKQLQQY AET  
B NLSGVNNLEHGLFPQLSAIALGVATAHGSTLAGVNVGEQYQQLREAAATEAEKQLQKYAES  
T NLSGVNNLEHGLFPQLSAIALGVATAHGSTLAGVNVGEQYQQLREAAATEAEKQLQKYAES

370 380 390 400 410 420  
R RELDSLGLDDQERRILMNFHQKKNEISFQQTNAMVTLRKERLAKLTEAITLASRPNLGSR  
E RELDHLGLDDQEKKILMNFHQKKNEISFQQTNAMVTLRKERLAKLTEAITAASLPKTS GH  
S RELDNLGLDEQEKKILMSFHQKKNEISFQQTNAMVTLRKERLAKLTEAITTASKIKVGD R  
B RELDHLGLDDQEKKILKDFHQKKNEISFQQT TAMVTLRKERLAKLTEAITSTSI LKTGRR  
T RELDHLGLDDQEKKILKDFHQKKNEISFQQT TAMVTLRKERLAKLTEAITSTSL LKTGKQ

430 440 450 460 470 480  
R QDDGNEI PFP GPISNNPDQDHLEDDPRDSRDTIIPNGAIDPEDGDFENYNGYHDDEVGTA  
E YDDDDDI PFP GPINDDDNPGHQDDPTDSQDTTIPDVVVD PDDGGYGEYQSYSENGMSAP  
S YPDDNDI PFP GPIDETHPNPSSDDNPDDSRDTTIPGGVVD PYDDESNNYPDYEDSAEGTT  
B YDDDDNDI PFP GPINDNENSGQNDDDPTDSQDTTIPDVIIDPNDGGYNNYSYDANDAASAP  
T YDDDDNDI PFP GPINDNENSEQQDDDDPTDSQDTTIPDIIVDPDDGRYNNYGDYPSETANAP

490 500 510 520 530 540  
R GDLVLF DLDDHEDDNKAFEPQDSSPQSQRERIERERLIHPPPGNNKDDNRAS-----DN-  
E DDLVLF DLDEDEDEDTKPVPNRSTKGGQKNSQK-----GQHTE-GRQTQSTPTQNV  
S GDLDFLNLDDDDDDSDQPGPPDRGQSKER-AARTHGLQDPTL---DGAKKVP ELTPGSHQP  
B DDLVLF DLDEDEDDADNPAQN---TPEKNDR---PATTKLRNGRDQDGNQSETASPRAAP-  
T EDLVLF DLDEDDHRPSS---SSENNNK---HSLTGTDSNKTSNWNRNPTNMPKKDS-

550 560 570 580 590 600  
R -NQQ-SADSEEQGGQYNWHRGPERTTANRR LSPVHEEDTLMDQGDDDPSSLPPLESDDDD  
E GPRRTIHHASAPLTDNDRRNEPSGSTSPRMLTPINEEADPLDDADDETSSLPPLESDDDEE  
S GN LH-ITKPGS----NTNQPGNMSSTLQSMTP IQEESEPDDQKDDDDDES L TSLDSEGDE  
B -NQY-RDKPMPQVQSRSENHDQTLQTPRVLTPISE EADPSDHNDGDNESIPPLES DDEG  
T -TQN-NDNPAQRAQEYARDNIQDTPTPHRA LTP ISEETGSNGHNEDDIDSIPPLESDEEN

610 620 630 640 650 660  
R ASSSQQDPDYTAVAPPAPVYRS AEAEHPHKSSNEPAETS QL-NEDPDIGQSKSMQKLEE  
E QDRDGT SNRTPTVAPPAPVYRDHSEKKELPQDEQQDQDHI-QEARNQDS DNTQPEHSFEE  
S DVESVSGENNP TVAPPAPVYKDTGVDTNQNGP-SNAVDGQGESEALPINPEKRSAL EE  
B STDTTAAETKPATAPPAPVYRSISVDDSVPLEN-IPAQSNQTNNE DNVRNNAQSEQSIAE  
T NTETTITTTKNTTAPPAPVYRSNSEKEPLPQEK-SQKQPNQVSGSENTDNKPHSEQSV EE

670 680 690 700 710 720  
R TYHHL LRTQGPF EAINYYHMMKDEPVI FSTDDGKEYTYPDSLEEAYPPWLTEKERLDKEN  
E MYRHILRSQGFDAVLYYHMMKDEPVV FSTSDGKEYTYPDSLEEEYPPWLTEKEAMNDEN  
S TYHHL LKTQGPF EAINYYHLM SDEPIAFSTESGKEYIFPDSLEEAYPPWLSEKEALEKEN  
B MYQHILKTQGFDAI LYYHMMKEEPIIFSTSDGKEYTYPDSLEDEYPPWLSEKEAMNEDN  
T MYRHILQTQGFDAI LYYMMTEEPIV FSTSDGKEYVYPDSLEGEHPPWLSEKEALNEDN

730 740  
R RYIYINNQQFFWPVMS PRDKFLAILQHHQ  
E RFVTL DGQQFYWPVMNHRNKFMAILQHHQ  
S RYLVIDGQQFLWPVMSLQDKFLAVLQHD-  
B RFITMDGQQFYWPVMNHRNKFMAILQHHR  
T RFITMDDQQFYWPVMNHRNKFMAILQHHK

H-L

10 20 30 40 50 60  
R -MATQHTQYPDARLSSPIVLDQCCLVTRACGLYSSYSLNPLRQCKLPKHIYRLKFDITV  
E -MATQHTQYPDARLSSPIVLDQCCLVTRACGLYSSYSLNPLRNCKLPKHIYRLKYDVTV  
S MMATQHTQYPDARLSSPIVLDQCCLVTRACGLYSEYSLNPKLRTCRLPKHIYRLKYDITV  
B -MATQHTQYPDARLSSPIVLDQCCLVTRACGLYSSYSLNPLKNCRLPKHIYRLKFDATV  
T -MATQHTQYPDARLSSPIVLDQCCLVTRACGLYSAYSLNPLKNCRLPKHIYRLKYDITV

70 80 90 100 110 120  
R SKFLSDTPVATLPIDYLVPIILLRSLTGHGDRPLTPTCNQFLDEIINYTLHDA AFLDYLLK  
E TKFLSDVPVATLPIDFIVPILLKALSNGFCPVEPRCQFLDEIIKYTMQDALFLKYLLK  
S LRFISDVPVATIPIDYIAPMLINVLADSKNVPLEPPCLSFLDEIVNYTVQDA AFLNYYMN  
B TKFLSDVPVATLPIDYLTPLLLRRTLSGEGLCPEPKCSQFLDEIVSYVLQDARFLRHYFR  
T TEFLSDVPVATLPADFLVPTFLRRTLSGNGSCPIDPKCSQFLDEIVNYTLQDIRFLNYYLN

130 140 150 160 170 180  
R ATGAQDHLTNIATREKLKNEILNNDYVHQLFVHDLNILARRGRNLNRGNRSTWVHDEF  
E NVGAQEDCVDHDFQEKILSSIQNEFLHQMFWDLAAILTRRGRNLNRGNRSTWVHDDL  
S QIKTQEGVITDQLKQNIIRRVIHKNRYLSALFFVHDLAILTRGRMNRGNRSTWVVTNEV  
B HVGVHDDNVGKNFEPKIKALIYDNEFLQQLFYWDLAAILTRRGRNLNRGNRSTWFANDDL  
T RAGVHNDHVD RDFGQKIRNLICDNEVLHQMFHWDLAAILARRGRNLNRGNRSTWFASDNL

190 200 210 220 230 240  
R IDILGYGDYIFWKIPLSLLPVTIDGVPHAATDWDYQPTLFKESILGHSQILSVSTAEILIM  
E IDILGYGDYVFWKIPISLLPLNTQGI PHAAMDWDYQTSVFKEAVQGH THIVSVSTADVLIM  
S VDILGYGDYIFWKIPIALLPMNTANVPHASTDWDYQPNIFKEAIQGH THII SVSTAEVLIM  
B IDILGYGDYIFWKIPLSLLSLNTEGI PHAAKDWDYHASIFKEAVQGH THIVSVSTADVLIM  
T VDILGYGDYIFWKIPLSLLPVD TQGLPHA AKDWDYHESVFKEAIQGH THIVSISTADVLIM

250 260 270 280 290 300  
R CKDIIITCRFN TSLIASIAKLEDVDVSDYDPDPSDILKIYNAGDYVISILGSEGYKIIKYLE  
E CKDLITCRFN TLLISKIAEVEDPVCSDYPNFKIVSM LYQSGDYLLSILGSDGYKIIKFLE  
S CKDLVTSRFN TLLIAELARLEDVPSADYPLVDNIQSLYNAGDYLLSILGSEGYKIIKYLE  
B CKDIIITCRFN TLLIAALANLEDSICSDYQPETISNLYKAGDY LISILGSEGYKVIKFLE  
T CKDIIITCRFN TLLIAAVANLEDSVHSDYPLPETVSDLYKAGDY LISLLGSEGYKVIKFLE

310 320 330 340 350 360  
R PLCLAKIQLC SKF TERKGRFLTQMHL SVINDLRELISNRRLKDYQQEKIRDFHKILLQLQ  
E PLCLAKIQLC SKY TERKGRFLTQMHLAVNHTLEEITEIRALKPSQAHKIREFHRTLIRLE  
S PLCLAKIQLC SQY TERKGRFLTQMHLAVIQTRELLLN RGLKKSQLSKIREFHQLLLRLR  
B PLCLAKIQLC S NY TERKGRFLTQMHLAVNHTLEELIEGRGLKSQQDWK MREFH RILVNLK  
T PLCLAKIQLC S NY TERKGRFLTQMHLAVNHTLEELTGSREL RPQQIRK VREFH QMLINLK

370 380 390 400 410 420  
R LSPQQFCELFSVQKHWGHPVLHSEKAIQVKKRHATILKALRPNVI FET YCVFKYNI AKHY  
E MTPQQLCELFSIQKHWGHPVLHSETAIQVKVKHATV LKALRP IIV FET YCVFKYSI AKHY  
S STPQQLCELFSIQKHWGHPVLHSEKAIQVKKNHATV LKALRP IIFET YCVFKYSV AKHF  
B STPQQLCELFSVQKHWGHPVLHSEKAIQVKVKHATI I KALRP IIFET YCVFKYSI AKHY  
T ATPQQLCELFSVQKHWGHPVLHSEKAIQVKVKHATV I KALRP IIFET YCVFKYSI AKHY

430 440 450 460 470 480  
R FDSQGTWYSVISDRNLTPGLNSFIKRNHFPSLPMIKDLLWEFYHLNHPPLFSTKVISDLS  
E FDSQGSWYSVTSDRNLTPGLNSYIKRNQFPPLPMIKELLWEFYHLDHPPLFSTKIISDLS  
S FDSQGTWYSVISDRCLTPGLNSYIRRNQFPPLPMIKDLLWEFYHLDHPPLFSTKIISDLS  
B FDSQGSWYSVISDKHLTPGLHSYIKRNQFPPLPMIKDLLWEFYHLDHPPLFSTKIISDLS  
T FDSQGTWYSVTSDRCLTPGLSSYIKRNQFPPLPMIKELLWEFYHLDHPPLFSTKVISDLS

490 500 510 520 530 540  
R IFIKDRATAVEQTCWDAVFEPNVLGYNPPNKFSTKRVPPEQFLEQEDFSIESVLNYAQELH  
E IFIKDRATAVERTCWDAVFEPNVLGYNPPHKFSTKRVPPEQFLEQENFSIENVLSYAQKLE  
S IFIKDRATAVEQTCWDAVFEPNVLGYSPPYRFNTKRVPPEQFLEQEDFSIESVLQYAQELR  
B IFIKDRATAVEKTCWDAVFEPNVLGYSPPNKFSTKRVPPEQFLEQENFSIDSVLTYAQRDL  
T IFIKDRATAVEKTCWDAVFEPNVLGYNPPNKFATKRVPPEQFLEQENFSIESVLHYAQRLE

550 560 570 580 590 600  
R YLLPQNRNFSFSLKEKELNIGRTFGKLPYLTRNVQTLCEALLADGLAKAFPSNMMVVTER  
E YLLPQYRNFSFSLKEKELNVGRTFGKLPYPTRNVQTLCEALLADGLAKAFPSNMMVVTER  
S YLLPQNRNFSFSLKEKELNVGRTFGKLPYLTRNVQTLCEALLADGLAKAFPSNMMVVTER  
B YLLPQYRNFSFSLKEKELNVGRAFGKLPYPTRNVQTLCEALLADGLAKAFPSNMMVVTER  
T YLLPEYRNFSFSLKEKELNIGRAFGKLPYPTRNVQTLCEALLADGLAKAFPSNMMVVTER

610 620 630 640 650 660  
R EQKESLLHQASWHHTSDDFGENATVRGSSFVTDLEKYNLAFRYEFTAPFIEYCNHCYGVR  
E EQKESLLHQASWHHTSDDFGEHATVRGSSFVTDLEKYNLAFRYEFTAPFIEYCNRCYGVK  
S EQKESLLHQASWHHTSDDFGEHATVRGSSFVTDLEKYNLAFRYEFTAPFIKYNQCYGVR  
B EQKESLLHQASWHHTSDDFGENATVRGSSFVTDLEKYNLAFRYEFTAPFIEYCNRCYGVK  
T EQKESLLHQASWHHTSDDFGENATVRGSSFVTDLEKYNLAFRYEFTAPFIEYCNRCYGVR

670 680 690 700 710 720  
R NVFNWMHYLIPQCYMHVSDYYNPPHNVLNREYPPPEGPSSYRGHLGGIEGLQQKLWTSI  
E NVFNWMHYTIPQCYMHVSDYYNPPHNLTLENRNNPPEGPSSYRGHMGGIEGLQQKLWTSI  
S NVFDWMHFLIPQCYMHVSDYYNPPHNVTLENREYPPPEGPSAYRGHLGGIEGLQQKLWTSI  
B NLFNWMHYTIPQCYIHVSDYYNPPHGVLENREDPPEGPSSYRGHLGGIEGLQQKLWTSI  
T NLFNWMHYTIPQCYIHVSDYYNPPHGVLENRENPPPEGPSSYRGHLGGIEGLQQKLWTSI

730 740 750 760 770 780  
R SCAQISLVEIKTGFKLRSAVMGDNQCITVLSVFPLETDPEEQEQSAEDNAARVAASLAKV  
E SCAQISLVEIKTGFKLRSAVMGDNQCITVLSVFPLETDAGEEQEQSAEDNAARVAASLAKV  
S SCAQISLVEIKTGFKLRSAVMGDNQCITVLSVFPLESSPNEQERCAEDNAARVAASLAKV  
B SCAQISLVEIKTGFKLRSAVMGDNQCITVLSVFPLETDSNEQEHSSEDNAARVAASLAKV  
T SCAQISLVEIKTGFKLRSAVMGDNQCITVLSVFPLETESSEQELSEDNAARVAASLAKV

790 800 810 820 830 840  
R TSACGIFLKPDETFVHSGFIYFGKKQYLNQVQLPQSLKTAARMAPLSDAIFDDLQGTLAS  
E TSACGIFLKPDETFVHSGFIYFGKKQYLNQVQLPQSLKTATRMAPLSDAIFDDLQGTLAS  
S TSACGIFLKPDETFVHSGFIYFGKKQYLNQIQLPQSLKTAARMAPLSDAIFDDLQGTLAS  
B TSACGIFLKPDETFVHSGFIYFGKKQYLNQVQLPQSLKTATRIAPLSDAIFDDLQGTLAS  
T TSACGIFLKPDETFVHSGFIYFGKKQYLNQVQLPQSLKTATRIAPLSDAIFDDLQGTLAS

850 860 870 880 890 900  
R IGTAFERAISETRHILPCRIVAAAFHTYFAVRILQYHHLGFNKGIDLGQLSLSKPLDYGTI  
E IGTAFERAISETRHIFPCRITAAAFHTFFSVRILQYHHLGFNKGFDLGQLTLGKPLDFGTI  
S IGTAFERAISETRHILPCRVAAAFHTYFVVRILQHHHLGFHKGSDLGQLAINKPLDFGTI  
B IGTAFERAISETRHVYPCRVVAAAFHTFFSVRILQYHHLGFNKGTDLGQLSLSKPLDFGTI  
T IGTAFERAISETRHVVPCRVVAAAFHTFFSVRILQYHHLGFNKGTDLGQLSLSKPLDFGTI

910 920 930 940 950 960  
R TLT LAVPQVLGGLSFLNPEKCFYRNLGDPVTSGLFQLRVYLEMVNMKDLFCPLISKNPGN  
E SLALAVPQVLGGLSFLNPEKCFYRNLGDPVTSGLFQLKTYLRMIEMDDLFLPLIAKNPGN  
S ALSLAVPQVLGGLSFLNPEKCLYRNLGDPVTSGLFQLKHYLSVMGMSDIFHALVAKSPGN  
B TLALAVPQVLGGLSFLNPEKCFYRNLGDPVTSGLFQLRTYLQMINMDDLFLPLIAKNPGN  
T TLALAVPQVLGGLSFLNPEKCFYRNLGDPVTSGLFQLKTYLQMIHMDDLFLPLIAKNPGN

970 980 990 1000 1010 1020  
R CSAIDFVLNPSGLNVPGSQDLTSFLRQIVRRSITLTARNKLINTLFHASADLEDEMVCCKW  
E CTAIDFVLNPSGLNVPGSQDLTSFLRQIVRRITITLSAKNKLINTLFHASADFEDEMVCCKW  
S CSAIDFVLNPGGLNVPGSQDLTSFLRQIVRRSITLSARNKLINTLFHASADLEDELVCCKW  
B CSAIDFVLNPSGLNVPGSQDLTSFLRQIVRRITITLSAKNKLINTLFHSSADLEDEMVCCKW  
T CSAIDFVLNPSGLNVPGSQDLTSFLRQIVRRITITLSAKNKLINTLFHSSADLEDEMVCCKW

1030 1040 1050 1060 1070 1080  
R LLSNPVMSRFAADIFSRTPSGKRLQILGYLEGTRTLLASKIINNSETPVLDKLRKITL  
E LLSSTPVMSRFAADIFSRTPSGKRLQILGYLEGTRTLLASKIINNNTETPVLDRLRKITL  
S LLSSTPVMSRFAADIFSRTPSGKRLQILGYLEGTRTLLASKMISNNAETPILERLRKITL  
B LLSSTPVMSRFAADIFSRTPSGKRLQILGYLEGTRTLLASKVINNNAETPILDRLRKITL  
T LLSSTPVMSRFAADIFSRTPSGKRLQILGYLEGTRTLLASKIINHNTETPILDRLRKITL

1090 1100 1110 1120 1130 1140  
R QRWNLWFSYLDHCDQLLADALQKISCTVDLAQILREYTWSHILEGRSLIGATLPCMVEQF  
E QRWSLWFSYLDHCDNILAEALTQITCTVDLAQILREYSWAHILEGRPLIGATLPCMIEQF  
S QRWNLWFSYLDHCDPALMEAIQPIKCTVDIAQILREYSWAHILDGRQLIGATLPCIQE  
B QRWSLWFSYLDHCDQVLADALIKVSVCTVDLAQILREYTWAHILEGRQLIGATLPCMIEQF  
T QRWSLWFSYLDHCDQVLADALTQITCTVDLAQILREYTWAHILEGRQLIGATLPCILEQL

1150 1160 1170 1180 1190 1200  
R KVKWLGQYEPCECLNKKG--SNAYVSVAVKDQVVS AWPNTSRI SWTIGSGVPYIGSRTE  
E KVVWLKPYEQCPQCSNAKQPGGKPFVSVAVKKHIVSAWPNASRI SWTIGDGIPYIGSRTE  
S QTTWLKPYEQCVECSSTNN--SSPYVSVALKRNVVSAWPDASRLGWTIGDGIPYIGSRTE  
B NVFVLKSYEQCPKCARSRNPKGEPFVSVIAIKKQVVS AWPNQSRNLNWTIGDGVPIYIGSRTE  
T NVIWLKPYEHCPKCAKSANPKGEPFVSVIAIKKHVVSAWPDQSRLSWTIGDGIPYIGSRTE

1210 1220 1230 1240 1250 1260  
R DKIGQPAIKPRCPSAALKEAIELASRLTWVTQGGNSSEQLIRPFLEARVNLVSEVLQMT  
E DKIGQPAIKPKCPSAALREAIELASRLTWVTQGGNSDLLIKPFLEARVNLVQEIILQMT  
S DKIGQPAIKPRCPSAALREAIELTSRLTWVTQGSANS DQLIRPFLEARVNLVQEIILQMT  
B DKIGQPAIKPKCPSAALREAIELTSRLTWVTQGGANS DLLVKKPFVEARVNLVQEIILQMT  
T DKIGQPAIKPKCPSAALREAIELTSRLTWVTQGGANS DLLVKKPFIEARVNLVQEIILQMT

1270 1280 1290 1300 1310 1320  
R PSHYSGNIVHRYNDQYSPHSFMANRMSNTATRLIVSTNTLGEFSGGGQAARDSNII FQNV  
E PSHYSGNIVHRYNDQYSPHSFMANRMSNSATRLIVSTNTLGEFSGGGQSARDSNII FQNV  
S PSHYSGNIVHRYNDQYSPHSFMANRMSNTATRLMVSTNTLGEFSGGGQAARDSNII FQNV  
B PSHYSGNIVHRYNDQYSPHSFMANRMSNSATRLVVSTNTLGEFSGGGQSARDSNII FQNV  
T PSHYSGNIVHRYNDQYSPHSFMANRMSNSATRLVVSTNTLGEFSGGGQSARDSNII FQNV

1330 1340 1350 1360 1370 1380  
R INLAVALYDIRFRNTNTSDIRHNRAHLHLTECCTKEVPAQYLYTTSALNLDLSRYRDNEL  
E INYAVAFDIKFRNTEATDIQYNRAHLHLTKCCTREVP AQYLYTSTLDDLTRYRENEL  
S INFAVALYDIRFRNTCTSSIQYHRAHIHLTNCCTREVP AQYLYTTTLNLDLSKYRNNEL  
B INFAVALFDLRFNRNTESSIQHNRAHLHLSCCCTREVP AQYLYTSTLSDLTRYRENEL  
T INFAVALFDLRFNRVATSSIQHHRAHLHLSCCCTREVP AQYLVYTSTLPLDLTRYRDNEL

1390 1400 1410 1420 1430 1440  
R IYDSNPLKGGGLNCNLTI D SPLVKGPRLNMIEDDLRFP HLSGWELAKTVVQSI ISDNSNS  
E IYDNNPLKGGGLNCNISFDNPFQKQLNII EDDLIRLPHLSGWELAKTIMQSI ISDSNNS  
S IYDSEPLRGGLNCNLSID SPLMKGPRLNII EDDLIRLPHLSGWELAKTVLQSI ISDSSNS  
B IYDNNPLKGGGLNCNLSFDNPLFKGQRLNII EEDLIRFP HLSGWELAKTIIQSI ISDSNNS  
T IYDDNPLRGGLNCNLSFDNPLFKGQRLNII EEDLIRLPYLSGWELAKTVIQSI ISDSNNS

1450 1460 1470 1480 1490 1500  
R STDP IISGETRSFTTHFLTYPQIGLLYSFGAVLC FYLGNTILWTKKLDYEQFLYYLHNQL  
E STDP IISGETRSFTTHFLTYPKIGLLYSFGAFVSY YLGNTILRTKKLTLDNFLYYLTTQI  
S STDP IISGETRSFTTHFLTYPKIGLLYSFGALIS FYLGNTILCTKKIGLTFEFLYYLQNQI  
B STDP IISGETRSFTTHFLTYPKVGLLYSFGAIVSY YLGNTIIRTKKLDLSHFMYLTTQI  
T STDP IISGETRSFTTHFLTYPKIGLLYSFGALIS Y YLGNTIIRTKKLTLNFIYYLATQI

1510 1520 1530 1540 1550 1560  
R HNLPHRALRVFKPTFKHASVMSRLMEIDSNFSIY IGGTSGDRGLSDAARLFLRTAIASFL  
E HNLPHRSLRILKPTFKHASVMSRLMSIDPHFSIY IGGGAAGDRGLSDAARLFLRTSIS SFL  
S HNLSHRSLRIFKPTFRHSSVMSRLMDIDPNFSIY IGGTAGDRGLSDAARLFLRIAISTFL  
B HNLPHRSLRILKPTFKHVSVISRLMSIDPHFSIY IGGTAGDRGLSDATRLFLRVAISSFL  
T HNLPHRSLRILKPTLKHASVISRLISIDSHFSIY IGGTAGDRGLSDAARLFLRTAITVFL

1570 1580 1590 1600 1610 1620  
R QFLKSWIIDRQKTIPLWIVYPLEGQQPESINEFL HKILGLLKQGPKSIPKEVSIQNDGHL  
E TFVKEWIIINRG TIVPLWIVYPLEGQNPTPVNN FLHQIVELLVHDSSRHQAFK--TTINDH  
S SFVEEWVIFRKANIPLWVIYPLEGQRPDP PGEFLNRVKS LIVGTEDDKNKGSIL--SRSG  
B QFVKKWIVEYRTAIPLVVYVYPLEGQNPD PINSFLHQIIALLQNESP--QNNIQFQEGRNN  
T QFVRKWIVERKTAIPLVVIYPLEGQSPSP INSLHHVIALLQHES--HDHVCAAEAHSR

1630 1640 1650 1660 1670 1680  
R DLAENNYVYNSKSTASNFFHASLAYWRSRKRKTQ DHNDFS RGDGTL---TEPVRKFSS  
E VHPHDNLVYTCKSTASNFFHASLAYWRSRHRNSNRKDL TRNSSTGSSTNNSDGHIKRSQE  
S EKCSSNLVYNCKSTASNFFHASLAYWRGRHRPKKTIGATNATTAPI---ILPLGNSDR  
B QQLSDNLVYMCKSTASNFFHASLAYWRSRHKGRPKNRSTEEQTVKPRPYNNFHSVKCASN  
T VETFDNLVYMCKSTASNFFHASLAYWRSR SKNQDKREMTKILSLTQTEKKN--SFGYTAH



1690                    1700                    1710                    1720                    1730                    1740  
 R-----NHQSDEKYYNVTCGKSPKPQERKDF--SQYRLSNNGQTMSNHRKKGKFKHKNPCK  
 EQT-----TRDPHDGTERS LVLQMSHEIKRTTIPQ-----ENTHQGPSFQ  
 SPPGLDLNRNNDTFIPTRIKQIVQGDSRNDRT-TTTRFPPKSR-----TPTSATEPPTK  
 BPPSIP--KSKSGT----QGSSA-FFEKLEYD-KEIELPTASTP---AEKPKTYTKALSSR  
 TPESTAVLGLSQT-----LAPPP-SADEATYD-RKNKVLKASRP---GKYSQNTTKAPPNQ  
  
 1750                    1760                    1770                    1780                    1790                    1800  
 RMLMESQRGTVL-----TEGDYFQNNTPPTDDVSSPHRLILPFFKLGHNHHAHD  
 ESFLSDSACGTANPKLNFD RSRHNVKSQDHNSASKREGHQIISHRLVLPFFFTLSQGRQLT  
 SMYEGSTTHQK-----LTDTHLDEDHNAKEFPSNPHRLVVPFFKLT KDGEYSI  
 BIYHGKTPSNAAKDDSTT-----SKGCDS-----KEENAVQASHRIVLPFFFTLSQNGYRTP  
 TT-----SCRDVSPNITG-----TDGCPSANEGSNSNNNNLVSHRIVLPFFFTLSHNYNERP  
  
 1810                    1820                    1830                    1840                    1850                    1860  
 RQDAQELMNQNIKQYLHQLRSM LDTTIYCRFTGIVSSMHYKLDEV LLEYNFSDSAITLAEG  
 ESSNESQTQDEISKYLRQLRSVIDTTVYCRFTGIVSSMHYKLDEV LWEIENFKSAVTLAEG  
 SEPSP EERSNIKGLLQHLR TMVDTTIYCRFTGIVSSMHYKLDEV LWEYNKFESAVTLAEG  
 BSVKKSEYVTEITKLIRQLKAI PDTTVYCRFTGVVSSMHYKLDEV LWEFDFSKTAVTLAEG  
 TSIRKSEGTTEIVRLRQLRAI PDTTIYCRFTGIVSSMHYKLDEV LWEFDFNFKSAITLAEG  
  
 1870                    1880                    1890                    1900                    1910                    1920  
 REGSGALLLLQKYSTRLLFLN TLATEHSIESEVVS GFSTPRMLLPIMQKVHEGQVTVILNN  
 E EGAGALLLIQKYQVKTLFFN TLATESSIESEIVSGM TTPRMLLPVMSKFHNDQIEIILNN  
 SEGSGALLLIQKYGVKKLFLN TLATEHSIESEVISGY TTPRMLLSIMPKTHRGELEVILNN  
 BEGSGALLLLQKYKVRTIFFN TLATEHSIEAEIVSGT TTPRMLLPVMAKLHDDQINVILNN  
 TEGSGALLLLQKYKVETLFFN TLATEHSIEAEIISGI TTPRMLLPIMSRFHGGQIKVTLNN  
  
 1930                    1940                    1950                    1960                    1970                    1980  
 RSASQITDITSSMWLS-NQKYNLPCQVEIIMMDAETT ENLNRSQLYRAVYNLILDHIDPQY  
 ESASQITDITNPTWFK-DQARLRPRQVEVITMDAETT ENINRSKLYEAVHKLILHHVDPSV  
 SSASQITDITHRDWFS-NQKNRIPNDADIITMDAETT ENLDRSRLYEAVYTIICNHINPKT  
 BSASQVTDITNPAWFT-DQKSRIPTQVEIMTMDAETT ENINRSKLYEAIQQLIVSHIDTRV  
 TSASQITDITNPSWLA-DQKSRI PKQVEIITMDAETT ENINRSKLYEAVQQQLIVSHIDPNA  
  
 1990                    2000                    2010                    2020                    2030                    2040  
 RLKVVVLKVFLSDIEGILWINDYLAPLFGAGYLIKPI TSSARSSEWYLCLSNLSTNRRSA  
 ELKAVVLKVFLSDTEGMLWLN DNLPFFATGYLIKPI TSSARSSEWYLCLTNFLSTTRKMP  
 SLKVVILKVFLSDLDGMCWINNYLAPMFGSGYLIKPI TSSAKSSEWYLCLSNLLSTLRRTQ  
 BLKIVIIKVFLSDIDGLLWLN DHLAPLFGSGYLIKPI TSSPKSSEWYLCLSNFLSASRRRP  
 TLKVVVLKVFLSDIDGILWLN DNLTPLFGLGYLIKPI TSSPKSSEWYLCLSNLLSTSRRLP  
  
 2050                    2060                    2070                    2080                    2090                    2100  
 RHQTHKACLGVIRDALQAQVQRGVYWL SHIAQYATKNLHCEYIGLGFPSLEKVLYHRYNLV  
 EQNHLSCKQVILTALQLQIQRS PYWLSHLTQYADCDLHLSYIRLGFPSLEKVLYHRYNLV  
 SHQTQANCLHVVCALQQVQRGSYWL SHLTKYTTSRLHNSYIAFGFPSLEKVLYHRYNLV  
 BHQGHA TCMQVIQTALRLQVQRSSYWL SHLVQYADINLHLSYVNLGFPSLEKVLYHRYNLV  
 THQSHTTCMHVIQTALQLQIQRS SYWLSHLVQYANHNLHLDYINLGFPSLERVLYHRYNLV



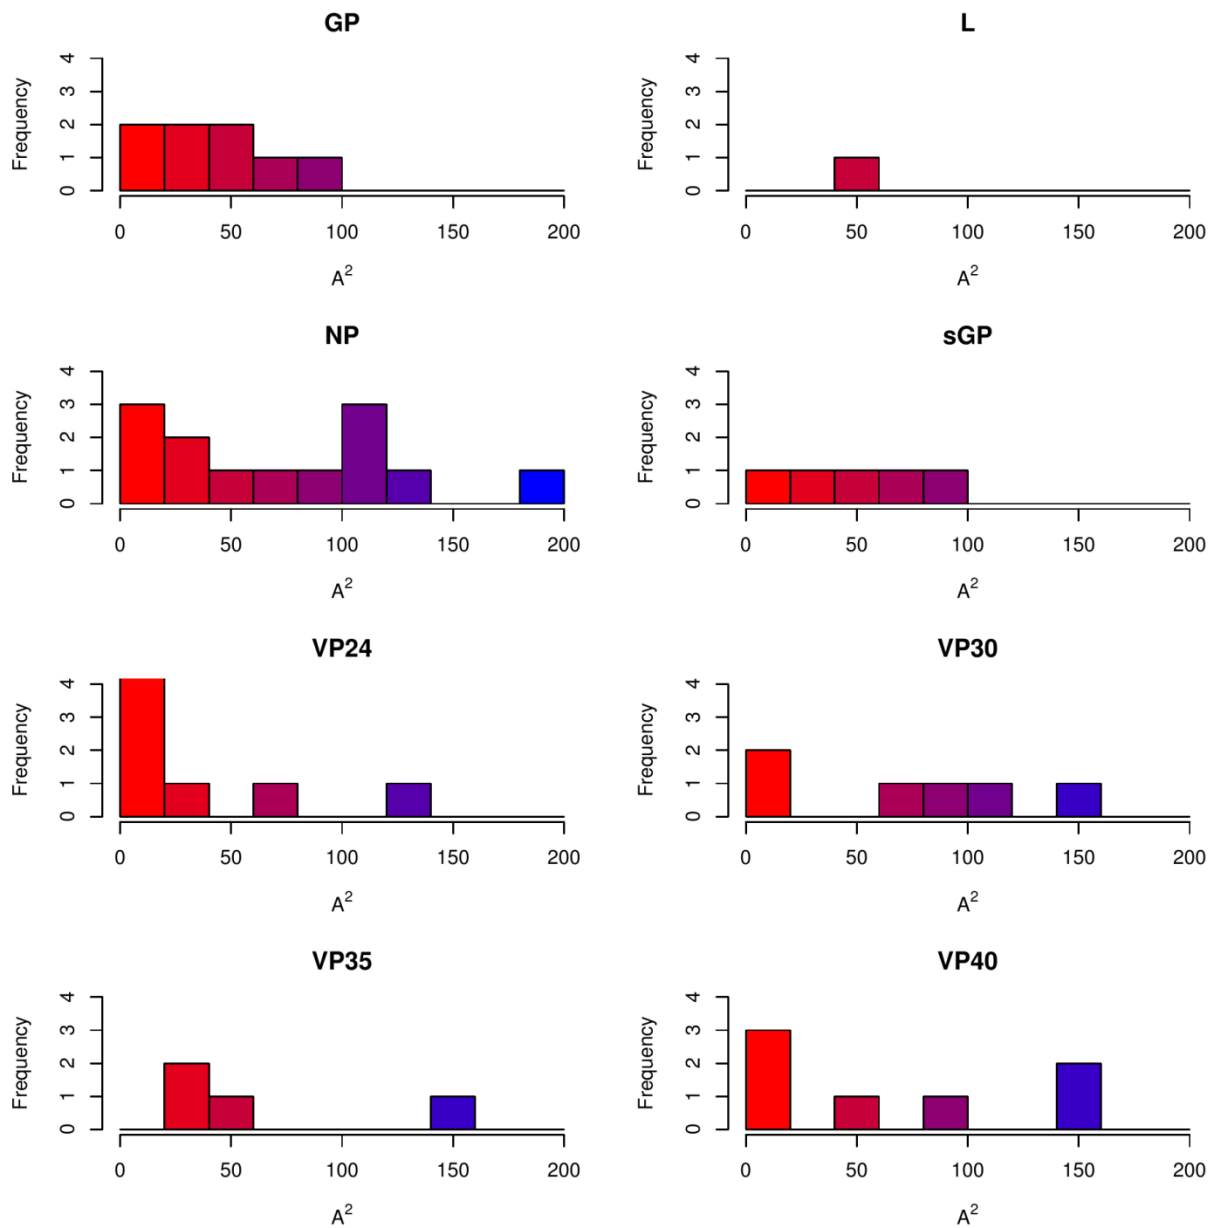

**Supplementary Figure 3. Solvent Accessible surface area for Ebolavirus SDPs.** Histograms showing the Solvent Accessible surface area in square ångstroms of SDPs. Values are calculated for the Ebola virus structure and residues.

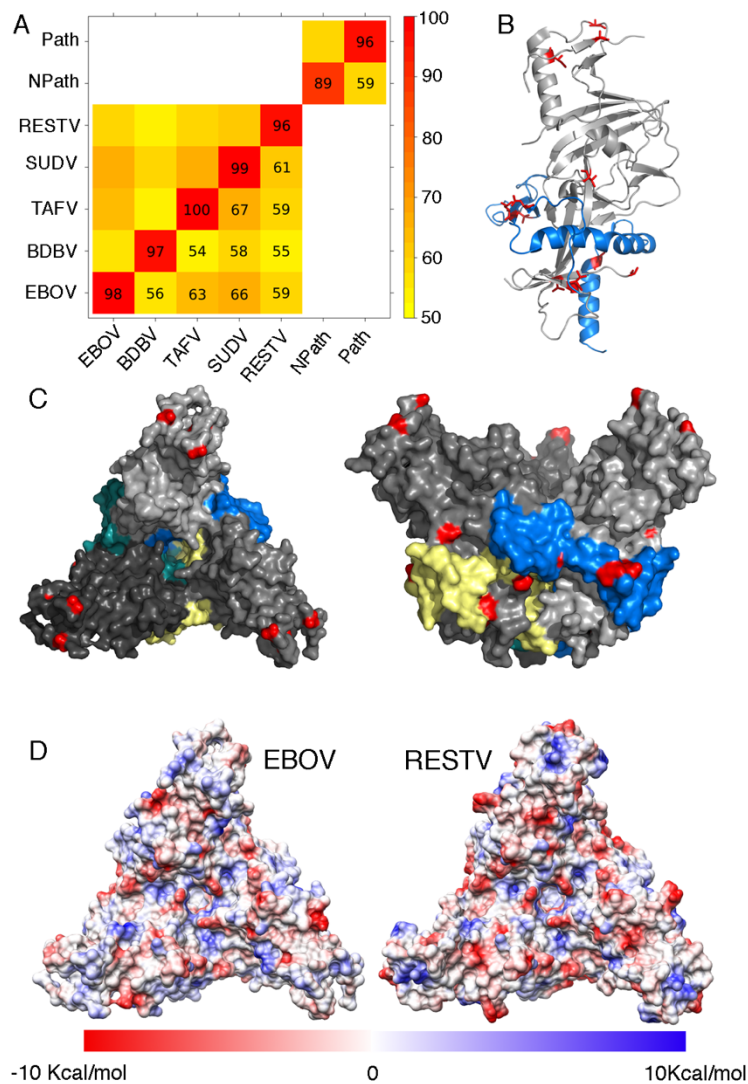

**Supplementary Figure 4.** GP SDPs. A) Heatmap of intra- and inter-species GP sequence identity (EBOV, Ebola virus; BDBV, Bundibugyo virus; SUDV, Sudan virus; TAFV, Taï Forest virus; RESTV, Reston virus). B) Monomeric representation of GP with GP1 (grey) and GP2 (blue). D) EBOV GP trimer (PDB code: 3CSY) with SDPs colored red. The three GP1 chains are colored grey. The three GP2 chains are colored blue, green and yellow. C) Electrostatics surfaces for the EBOV structure (3CSY) and a model of a RESTV GP trimer based on 3CSY.

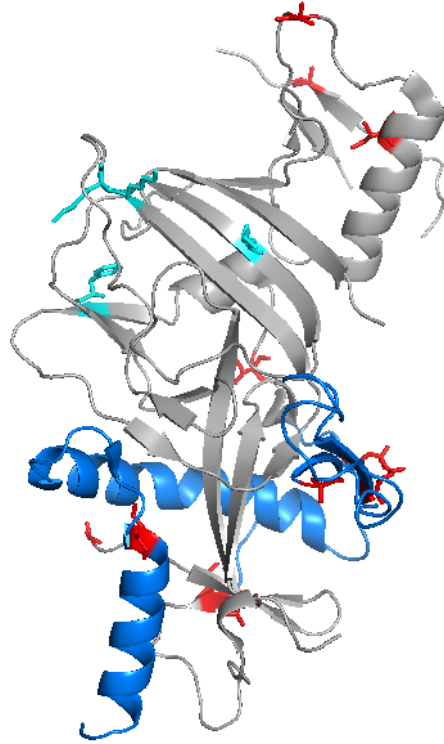

**Supplementary Figure 5. GP SDPs are located outside the putative NPC1 binding site.** GP SDPS are shown in red. The putative NPC1 binding site is shown in cyan.

**Supplementary Figure 6. SDP prediction with subsampling of Ebolavirus sequences.** The two groups of sequences ‘human pathogenic’ and Reston (‘non human pathogenic’) were sampled and SDP predictions made (see materials and methods). The boxplots show the distributions of the number of SDPs predicted in the simulations where A) only human pathogenic sequences were sampled, B) only Reston sequences were sampled and C) both sets were sampled. Sampling was performed for samples consisting of between 10%-90% of sequences (x axis). Red lines indicate the number of SDPs predicted in the full dataset without sampling. Note the scale of the Y-axis varies between each plot.

**A. Human pathogenic sequence sampled.**

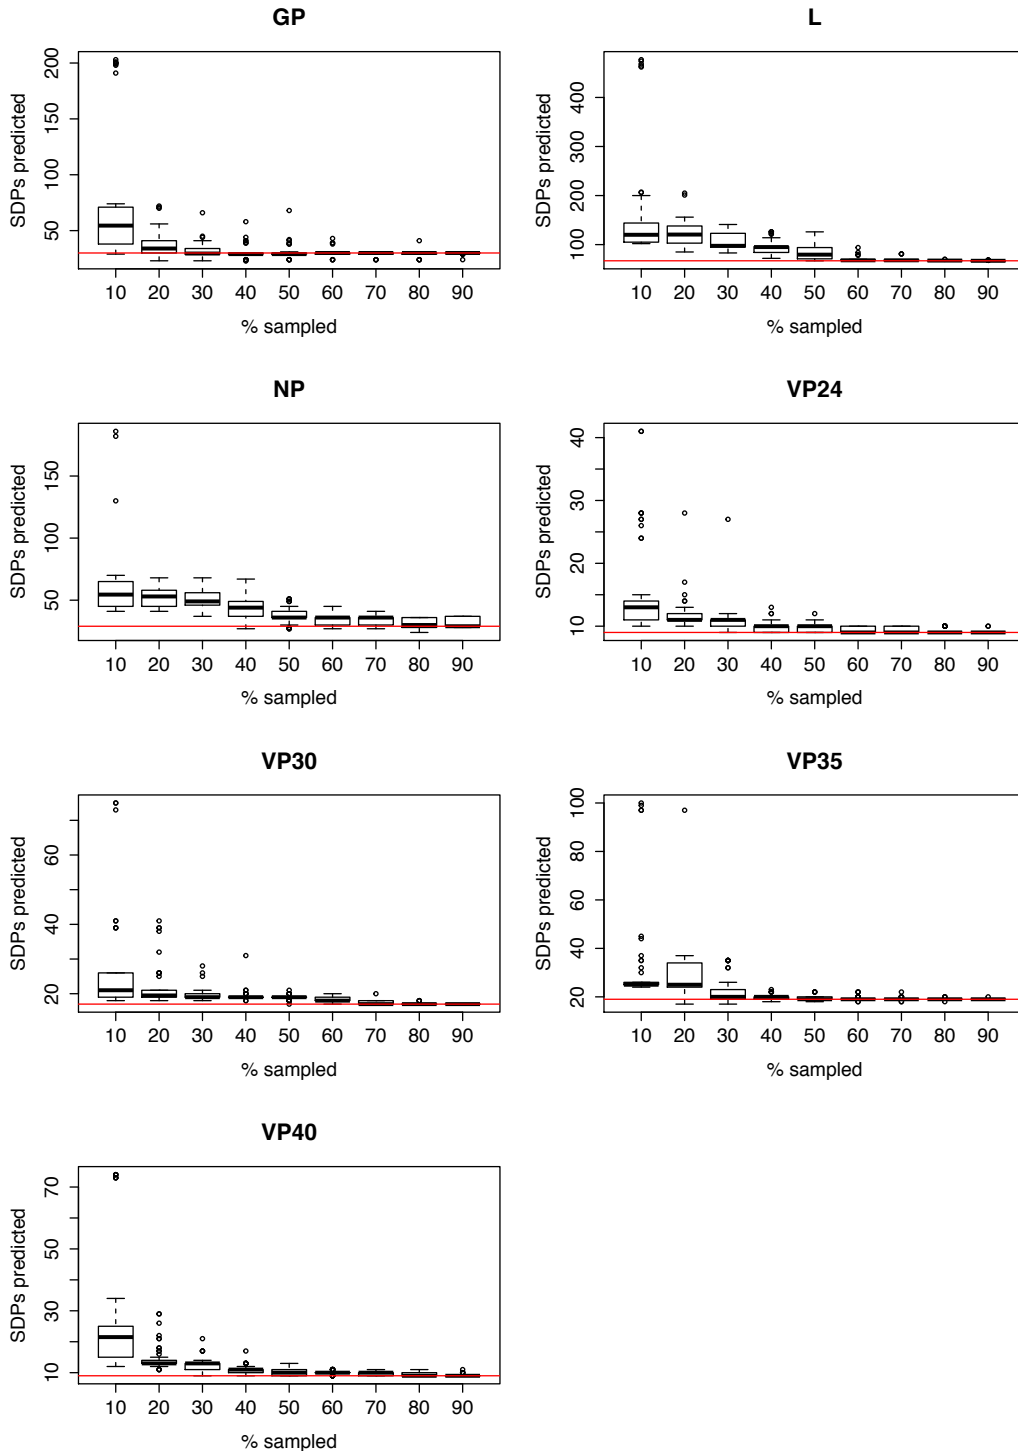

## B. Reston Sequences Sampled

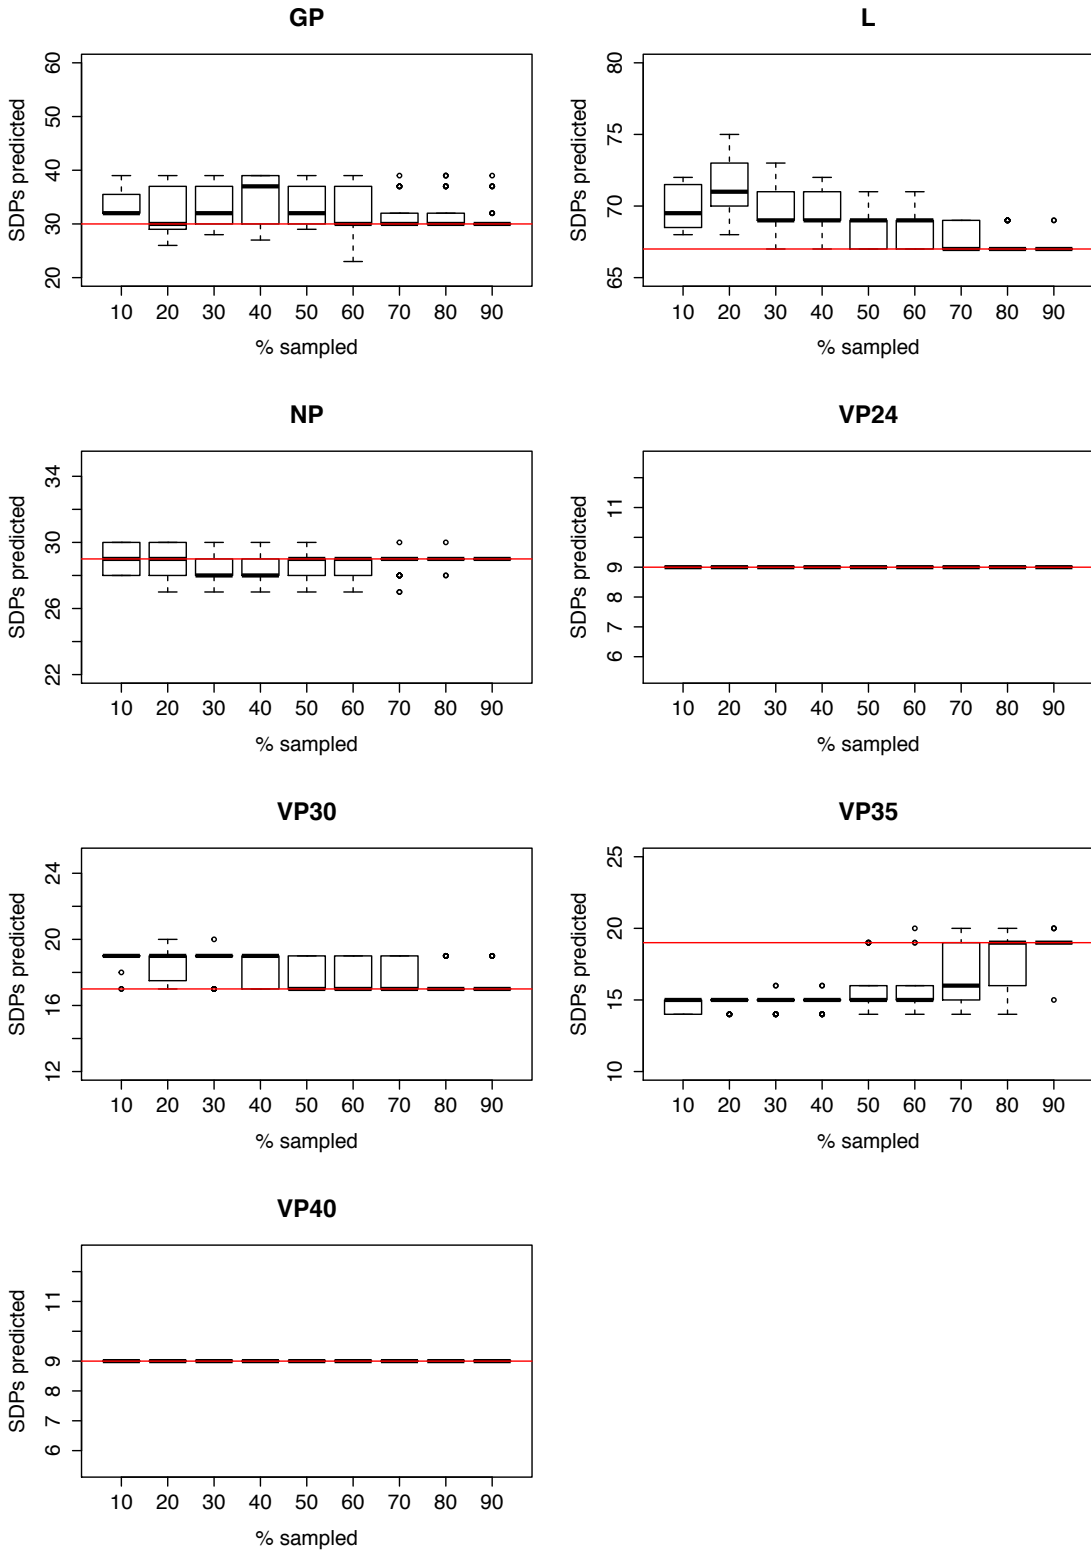

C. Both groups sampled

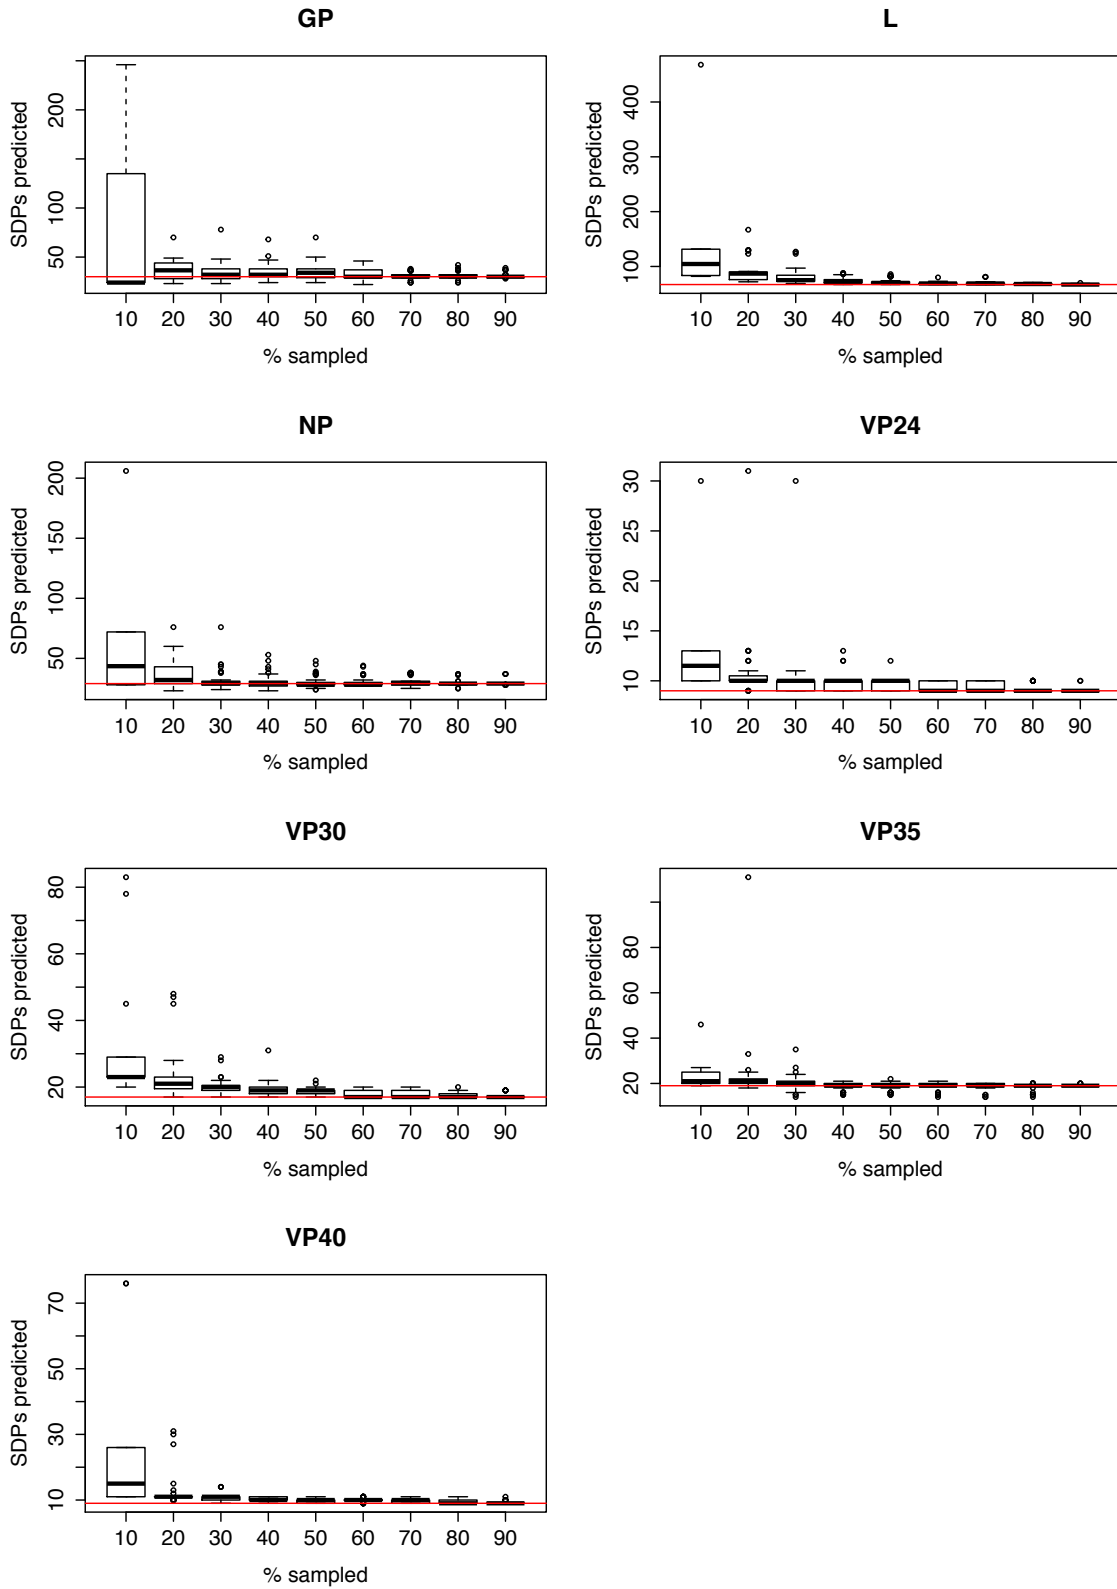



**Supplementary Figure 7. Change in SDP prediction with subsampling of Ebolavirus sequences.** The two groups of sequences ‘human pathogenic’ and Reston (‘non human pathogenic’) were sampled and SDP predictions made (see materials and methods). The boxplots show the number of SDPs predicted in each sampling that are also in the full dataset (red) and new SDPs that are predicted only in subsamples (blue). The black horizontal line indicates the number of SDPs predicted using the full dataset. Subsampling performed for A) only human pathogenic sequences were sampled, B) only Reston sequences were sampled and c) both sets were sampled.

**A. Human pathogenic sequence sampled.**

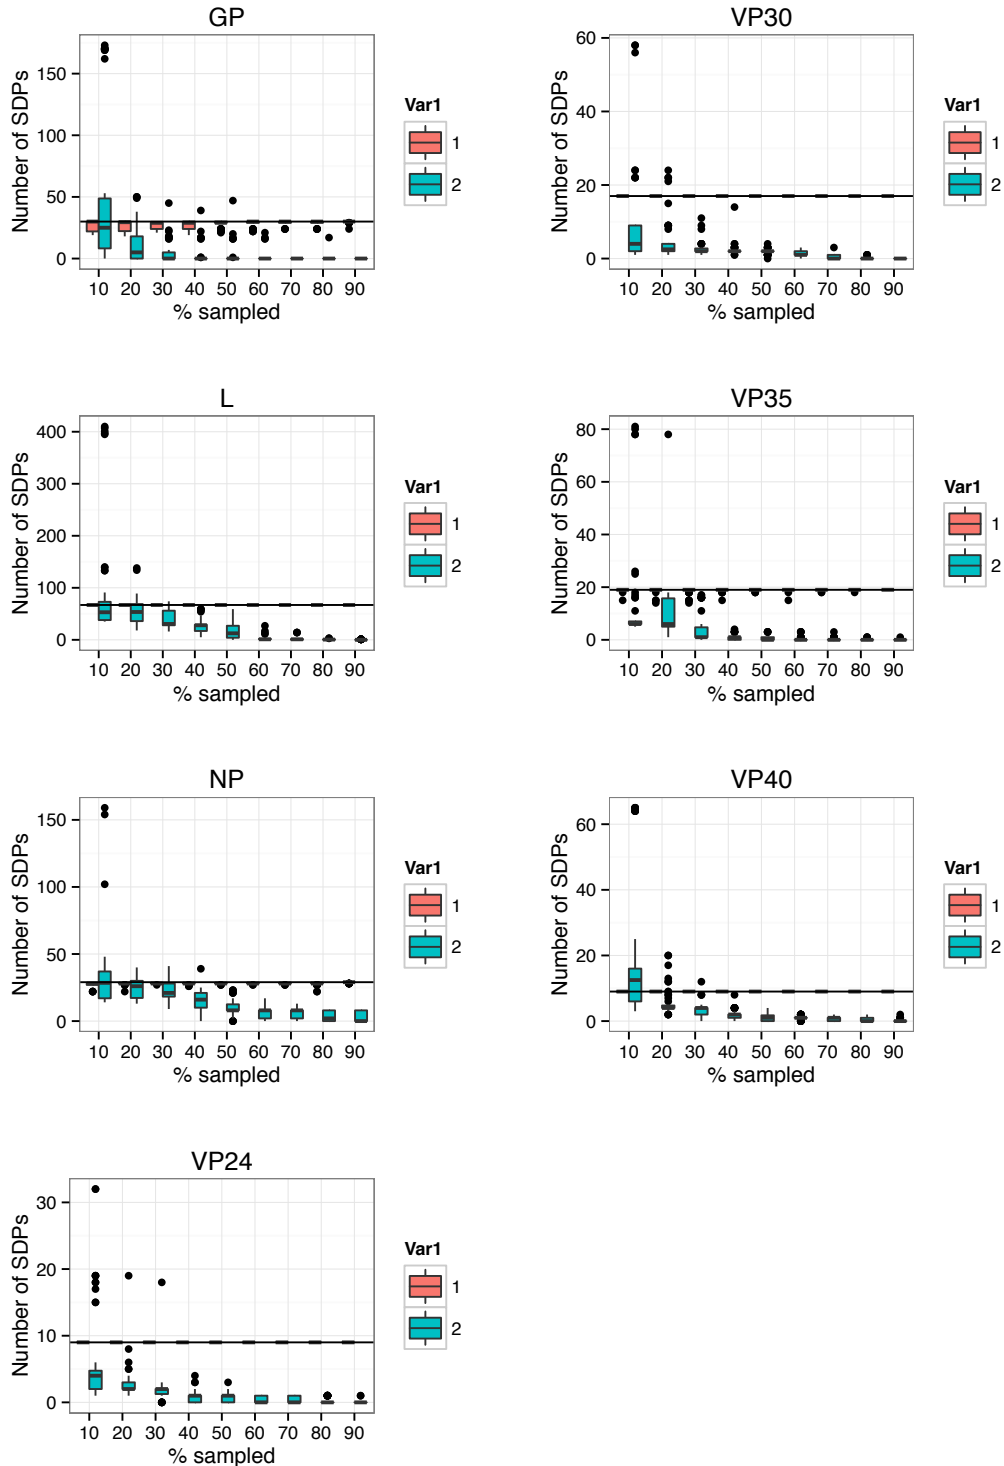

## B. Reston Sequences Sampled

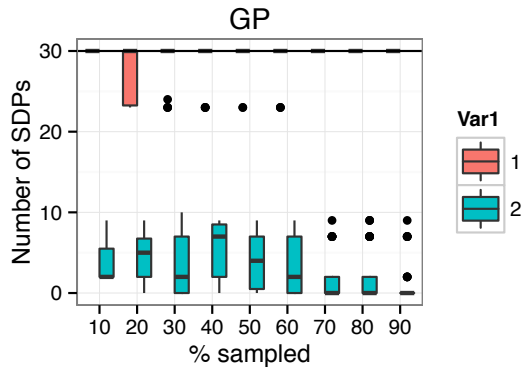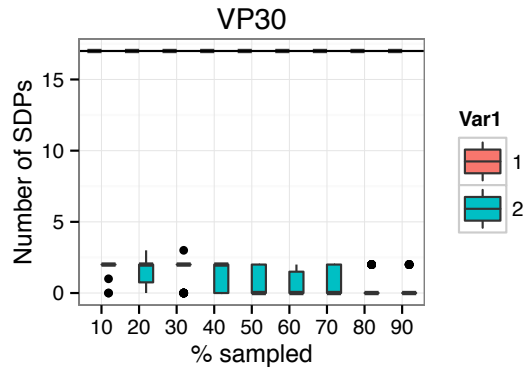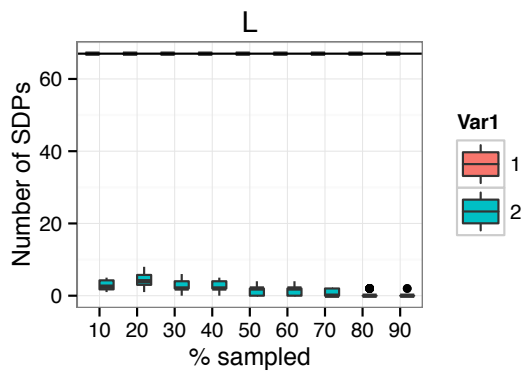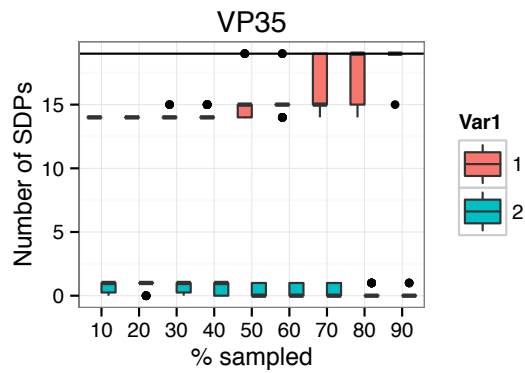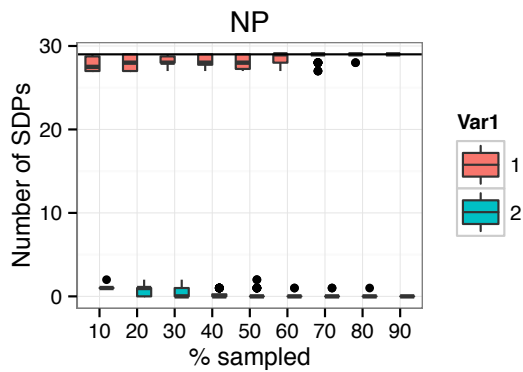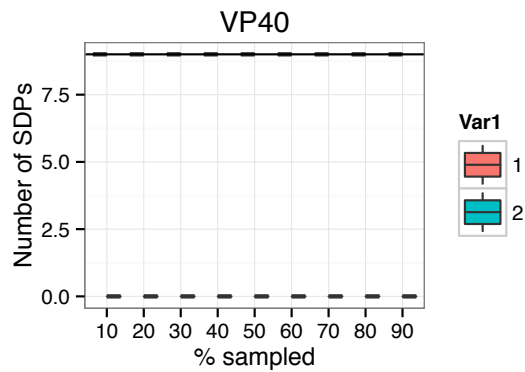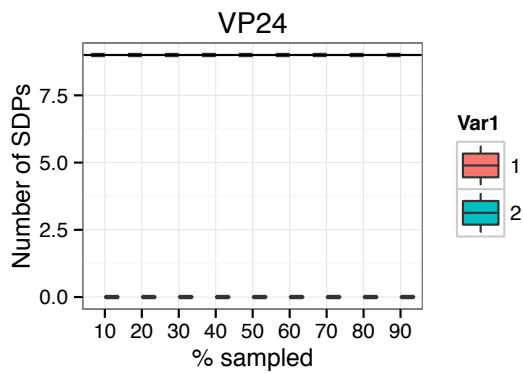

### C. Both groups sampled

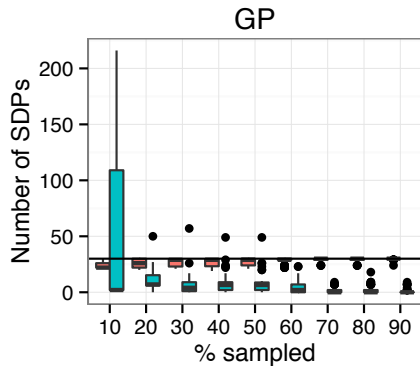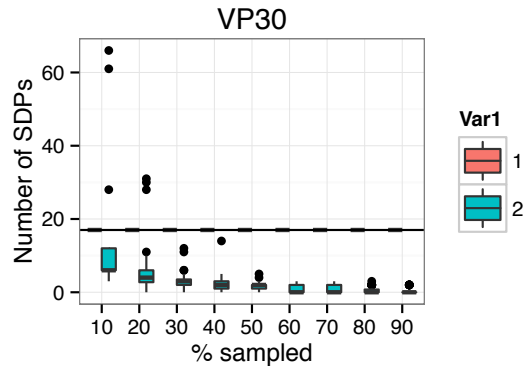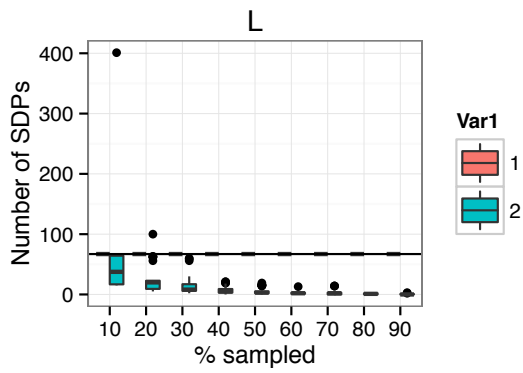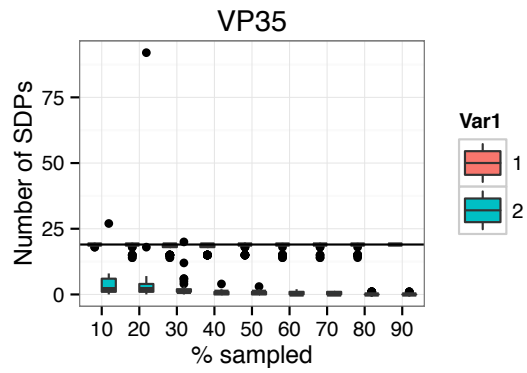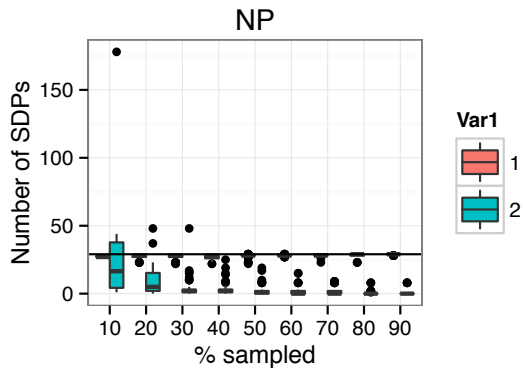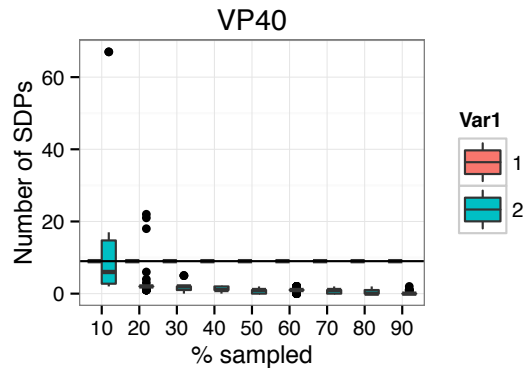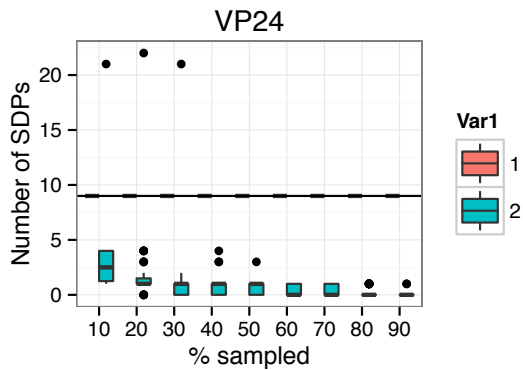

**Supplementary Figure 8. Analysis of completely conserved SDP with subsampling of Ebolavirus sequences.** The two groups of sequences ‘human pathogenic’ and Reston (‘non human pathogenic’) were sampled and SDP predictions made (see materials and methods). The boxplots show the number of SDPs predicted in each sampling that are completely conserved (red) and not completely conserved (blue). The red horizontal line indicates the number of completely conserved SDPs present in the full dataset and the blue line represents the equivalent for SDPs that are not completely conserved. Subsampling performed for A) only human pathogenic sequences were sampled, B) only Reston sequences were sampled and c) both sets were sampled.

**A. Human pathogenic sequence sampled.**

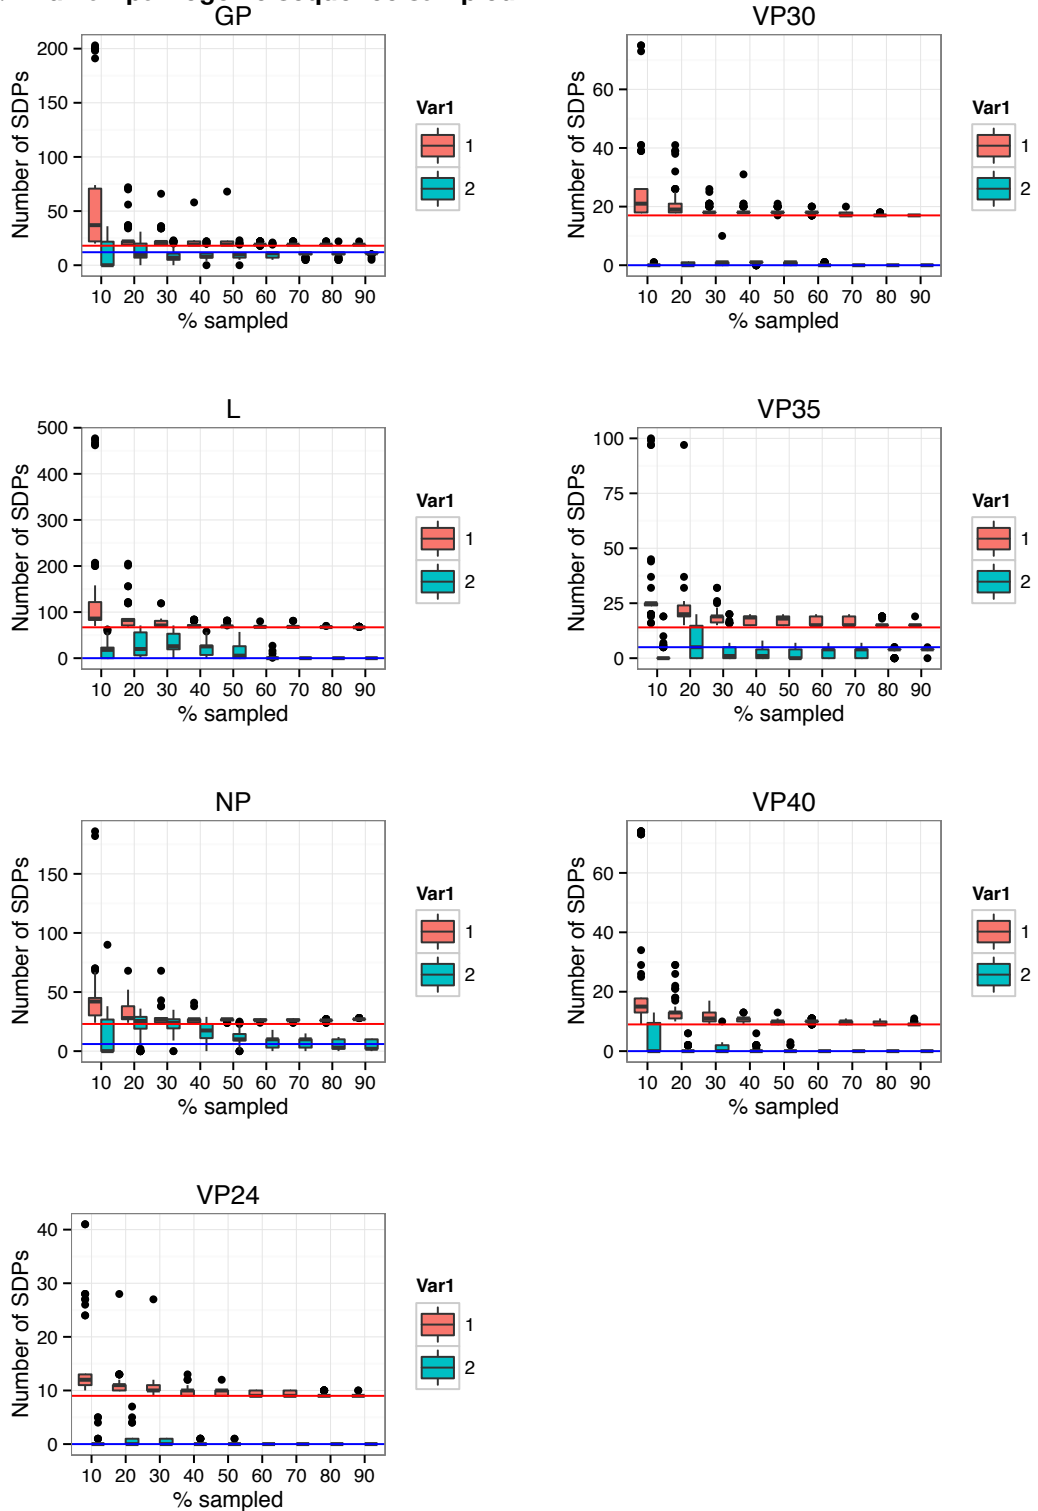

## B. Reston Sequences Sampled

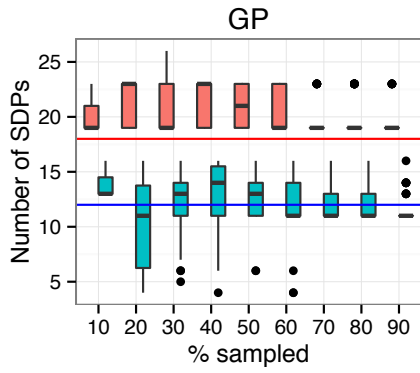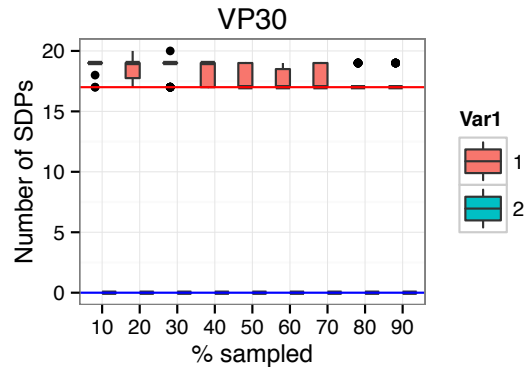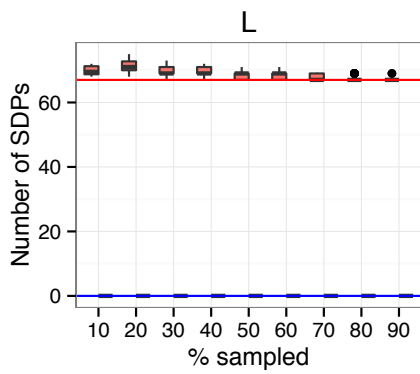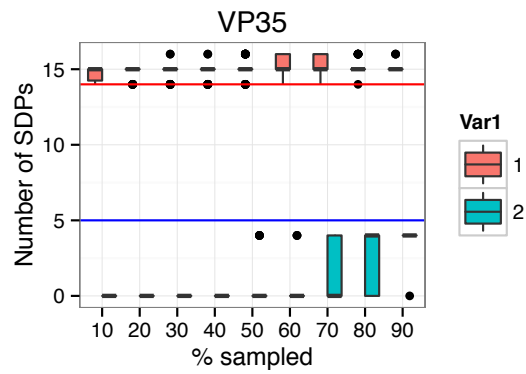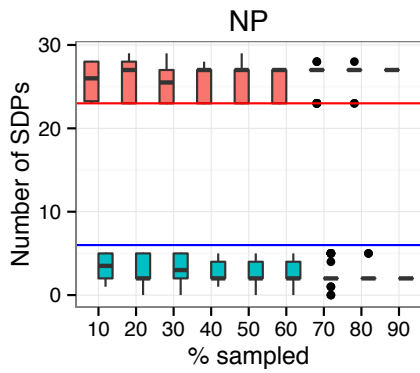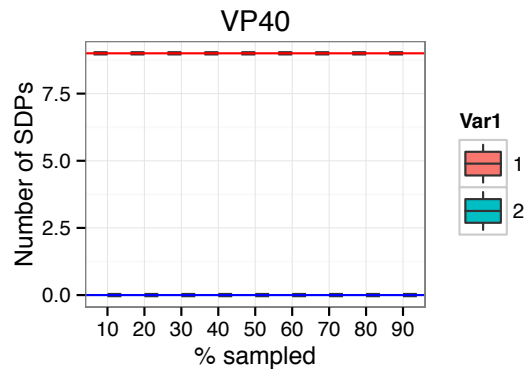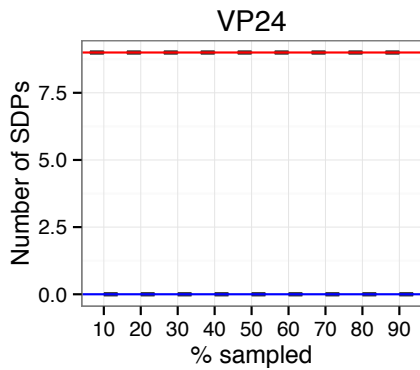

C. Both groups sampled

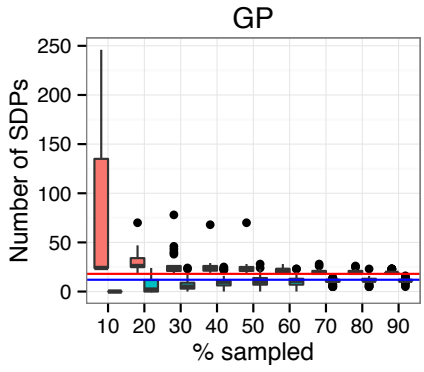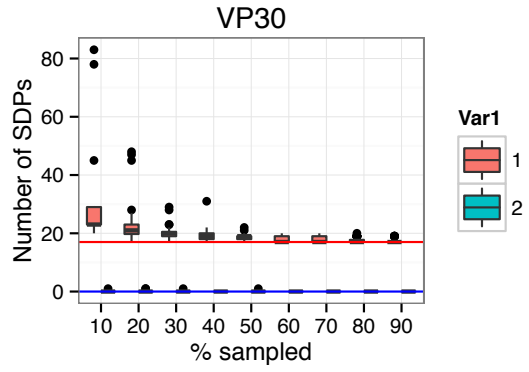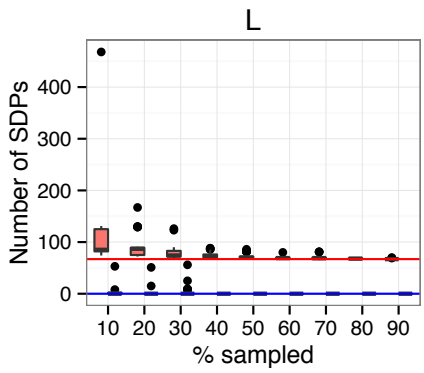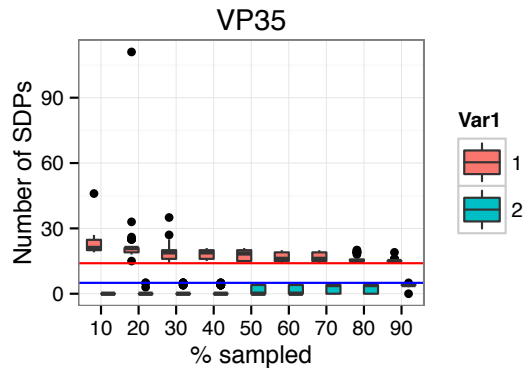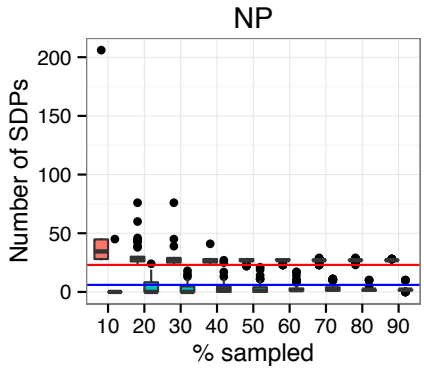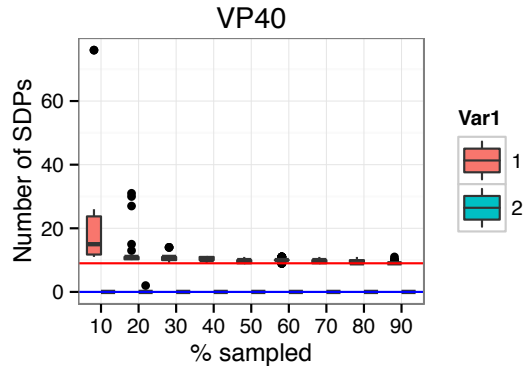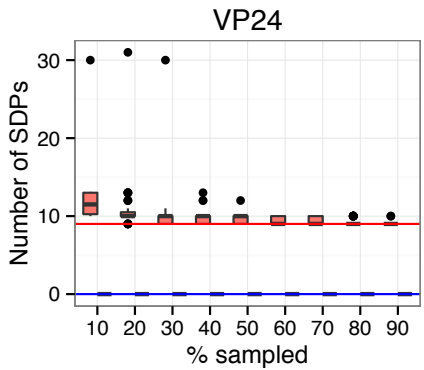

## Supplementary Tables

|                  | completely conserved positions | Number of Positions with variation | % of positions with variation |
|------------------|--------------------------------|------------------------------------|-------------------------------|
| All species      | 2597                           | 4555                               | 64%                           |
| Ebola virus      | 4287                           | 2865                               | 40%                           |
| Sudan virus      | 4363                           | 2789                               | 38%                           |
| Bundibugyo virus | 4426                           | 2726                               | 38%                           |
| Tai forest virus | 4480                           | 2672                               | 37%                           |
| Reston virus     | 4466                           | 2686                               | 38%                           |

**Supplementary Table 1.** Variation within the Ebolavirus genomes. The number of positions in the Ebolavirus protein multiple sequence alignments that are completely conserved and those that have variation are shown.

| Alignment position | RESTV | EBOV | BDBV | SUDV | TAFV | BLOSUM 62 score | SASA (Å <sup>2</sup> ) | mCSM ( $\Delta \Delta G$ , Kcal/mol) | S3det Rank |
|--------------------|-------|------|------|------|------|-----------------|------------------------|--------------------------------------|------------|
| 17                 | M17   | L17  | L17  | L17  | L17  | 2               | 70                     | -0.444 (destabilising)               | 1          |
| 22                 | I22   | V22  | V22  | V22  | V22  | 3               | 0                      | -0.916 (destabilising)               | 1          |
| 31                 | I31   | V31  | V31  | V31  | V31  | 3               | 17                     | -0.193 (destabilising)               | 1          |
| 131                | S131  | T131 | T131 | T131 | T131 | 1               | 36                     | -1.394 (destabilising)               | 1          |
| 132                | T132  | N132 | N132 | N132 | N132 | 1               | 9                      | -1.121 (destabilising)               | 1          |
| 136                | L136  | M136 | M136 | M136 | M136 | 2               | 2                      | -1.7 (destabilising)                 | 1          |
| 139                | R139  | Q139 | Q139 | Q139 | Q139 | 1               | 132                    | 0.05 (stabilising)                   | 1          |
| 226                | A226  | T226 | T226 | T226 | T226 | 0               | 2                      | -0.935 (destabilising)               | 1          |
| 248                | L248  | S248 | S248 | S248 | S248 | -2              | -                      |                                      | 1          |

**Supplementary Table 2. VP24 SDPs.** The position in the multiple sequence alignment, the amino acid position, and amino acid present in each of the species is shown. The BLOSUM62 score represents how frequently such amino acid changes are observed in nature. SASA is the solvent accessible surface area, which is only available for SDPs that could be mapped to protein structure. SASA was calculated using the protein structure with PDB code 4M0Q. RESTV, Reston virus; EBOV, Ebola virus; B, Bundibugyo virus; SUDV, Sudan virus; TAFV, Taï Forest virus. The s3det column shows the ranking of the SDPs by s3det.



| Alignment position | RESTV | EBOV | BDBV | SUDV | TAFV | BLOSUM 62 score | SASA (Å <sup>2</sup> ) | mCSM (Δ Δ G, Kcal/mol) | S3det rank |
|--------------------|-------|------|------|------|------|-----------------|------------------------|------------------------|------------|
| 53                 | N53   | T52  | T52  | T52  | T52  | 0               | -                      |                        | 1          |
| 54                 | L54   | V53  | V53  | V53  | V53  | 1               | -                      |                        | 1          |
| 64                 | I64   | T63  | T63  | T63  | T63  | -1              | -                      |                        | 1          |
| 94                 | D94   | E93  | E93  | E93  | E93  | 2               | -                      |                        | 1          |
| 97                 | N97   | T96  | T96  | T96  | T96  | 0               | -                      |                        | 1          |
| 99                 | H99   | R98  | R98  | R98  | R98  | 0               | -                      |                        | 1          |
| 108                | R108  | K107 | K107 | K107 | K107 | 2               | -                      |                        | 1          |
| 112                | I112  | S111 | S111 | S111 | S111 | -2              | -                      |                        | 1          |
| 117                | S117  | K116 | K116 | K116 | K116 | 0               | -                      |                        | 1          |
| 121                | S121  | A120 | A120 | A120 | A120 | 1               | -                      |                        | 1          |
| 151                | I151  | T150 | T150 | T150 | T150 | -1              | 7                      | 0.455 (stabilising)    | 1          |
| 158                | R158  | Q157 | Q157 | Q157 | Q157 | 1               | 70                     | -0.493 (destabilising) | 1          |
| 160                | L160  | I159 | I159 | I159 | I159 | 2               | 6                      | -0.859 (destabilising) | 1          |
| 197                | H197  | R196 | R196 | R196 | R196 | 0               | 83                     | -1.291 (destabilising) | 1          |
| 206                | D206  | E205 | E205 | E205 | E205 | -2              | 148                    | -0.373 (destabilising) | 1          |
| 263                | A263  | R262 | R262 | R262 | R262 | -1              | 106                    | -0.969 (destabilising) | 1          |
| 269                | Q269  | S268 | S268 | S268 | S268 | 0               | -                      |                        | 1          |

**Supplementary Table 3. VP30 SDPs.** The position in the multiple sequence alignment, the amino acid position, and amino acid present in each of the species is shown. The BLOSUM62 score represents how frequently such amino acid changes are observed in nature. SASA is the solvent accessible surface area, which is only available for SDPs that could be mapped to protein structure. SASA was calculated using the protein structure with PDB code 2I8B. RESTV, Reston virus; EBOV, Ebola virus; B, Bundibugyo virus; SUDV, Sudan virus; TAFV, Taï Forest virus. The s3det column shows the ranking of the SDPs by s3det.

| Alignment position | REST V | EBOV | BDB V | SUDV | TAFV | BLOSUM 62 SCORE | SASA (Å <sup>2</sup> ) | mCS M ( $\Delta \Delta G$ , Kcal/mol) | S3det rank |
|--------------------|--------|------|-------|------|------|-----------------|------------------------|---------------------------------------|------------|
| 27                 | T15    | S26  | S26   | S26  | S26  | 1               | -                      |                                       | 1          |
| 49                 | D37    | E48  | E48   | E48  | E48  | 2               | -                      |                                       | 1          |
| 77                 | E65    | D76  | D76   | D76  | D76  | 2               | -                      |                                       | 2          |
| 86                 | K74    | E85  | E85   | E85  | D86  | 1               | -                      |                                       | 3          |
| 93                 | M81    | S92  | S92   | S92  | S92  | -1              | -                      |                                       | 1          |
| 98                 | T86    | V97  | V97   | V97  | I98  | 0               | -                      |                                       | 3          |
| 102                | N90    | T101 | T101  | T101 | A102 | 0               | -                      |                                       | 3          |
| 107                | A95    | S106 | S106  | S106 | S106 | 1               | -                      |                                       | 1          |
| 122                | I110   | V121 | V121  | V121 | M122 | 3               | -                      |                                       | 3          |
| 155                | S143   | A154 | A154  | A154 | A154 | 1               | -                      |                                       | 1          |
| 160                | V148   | T159 | T159  | T159 | T159 | 0               | -                      |                                       | 1          |
| 161                | D149   | E160 | E160  | E160 | E160 | 2               | -                      |                                       | 1          |
| 168                | K156   | G167 | G167  | G167 | G167 | -2              | -                      |                                       | 1          |
| 175                | A163   | S174 | S174  | S174 | S174 | 1               | -                      |                                       | 1          |
| 182                | L170   | I181 | I181  | I181 | I181 | 2               | -                      |                                       | 2          |
| 270                | D258   | E269 | E269  | E269 | E269 | 2               | 144                    | -0.039 (destabilising)                | 1          |
| 291                | V279   | A290 | A290  | A290 | A290 | 0               | 23                     | -0.756 (destabilising)                | 1          |
| 315                | A303   | V314 | V314  | V314 | V314 | 0               | 49                     | -1.47 (destabilising)                 | 1          |
| 330                | K318   | Q329 | Q329  | Q329 | Q329 | 1               | 32                     | -0.513 (destabilising)                | 1          |

**Supplementary Table 4. VP35 SDPs.** The position in the multiple sequence alignment, the amino acid position, and amino acid present in each of the species is shown. The BLOSUM62 score represents how frequently such amino acid changes are observed in nature. SASA is the solvent accessible surface area, which is only available for SDPs that could be mapped to protein structure. SASA was calculated using the protein structure with PDB code 4IBB. RESTV, Reston virus; EBOV, Ebola virus; B, Bundibugyo virus; SUDV, Sudan virus; TAFV, Taï Forest virus. The s3det rank column shows the ranking of the SDPs by s3det. The s3det column shows the ranking of the SDPs by s3det.



| Alignme<br>nt<br>position | REST<br>V | EBOV | BDBV | SUDV | TAFV | BLOSU<br>M 62<br>SCORE | SASA<br>(Å <sup>2</sup> ) | mCSM<br>(Δ Δ G,<br>Kcal/m<br>ol) | S3det<br>rank |
|---------------------------|-----------|------|------|------|------|------------------------|---------------------------|----------------------------------|---------------|
| 46                        | V46       | T46  | T46  | T46  | T46  | 0                      | 83                        | -0.31<br>(destab<br>ilising)     | 1             |
| 85                        | T85       | P85  | P85  | P85  | P85  | -1                     | 142                       | -0.626<br>(destab<br>ilising)    | 1             |
| 122                       | V122      | I122 | I122 | I122 | I122 | 3                      | -                         |                                  | 1             |
| 201                       | N201      | G201 | G201 | G201 | G201 | 0                      | 53                        | -0.482<br>(destab<br>ilising)    | 1             |
| 209                       | L209      | F209 | F209 | F209 | F209 | 0                      | 15                        | -1.219<br>(destab<br>ilising)    | 1             |
| 245                       | P245      | Q245 | Q245 | Q245 | Q245 | -1                     | 160                       | 0.059<br>(stabili<br>sing)       | 1             |
| 269                       | Q269      | H269 | H269 | H269 | H269 | 0                      | -                         |                                  | 1             |
| 293                       | V293      | I293 | I293 | I293 | I293 | 3                      | 14                        | -1.411<br>(destab<br>ilising)    | 1             |
| 325                       | D325      | E325 | E325 | E325 | E325 | 2                      | -                         |                                  | 1             |

**Supplementary Table 5. VP40 SDPs.** The position in the multiple sequence alignment, the amino acid position, and amino acid present in each of the species is shown. The BLOSUM62 score represents how frequently such amino acid changes are observed in nature. SASA is the solvent accessible surface area, which is only available for SDPs that could be mapped to protein structure. SASA was calculated using the protein structure with PDB code 1ES6. RESTV, Reston virus; EBOV, Ebola virus; B, Bundibugyo virus; SUDV, Sudan virus; TAFV, Taï Forest virus. The s3det column shows the ranking of the SDPs by s3det.

| Alignment position | REST V | EBOV        | BDBV | SUDV | TAF V | BLOSUM 62 SCORE | SASA (Å <sup>2</sup> ) | mCS M (Δ Δ G, Kcal/mol) | S3det rank |
|--------------------|--------|-------------|------|------|-------|-----------------|------------------------|-------------------------|------------|
| 4                  | G4     | R4          | R4   | R4   | R4    | -2              |                        |                         | 1          |
| 16                 | D16    | E16         | E16  | E16  | G16   | 2               |                        |                         | 2          |
| 30                 | T30    | S30         | S30  | S30  | S30   | 1               |                        |                         | 1          |
| 39                 | K39    | R39         | R39  | R39  | R39   | 2               | 188                    | -0.161 (destabilising)  | 1          |
| 42                 | S42    | P42/<br>Q42 | P42  | P42  | Q42   | -1              | 103                    | -2.173 (destabilising)  | 3          |
| 56                 | V56    | I56         | I56  | I56  | I56   | 3               | 0                      | -0.8 (destabilising)    | 1          |
| 64                 | I64    | V64         | V64  | V64  | V64   | 3               | 7                      | -0.135 (destabilising)  | 1          |
| 105                | K105   | R105        | R105 | R105 | R105  | 2               | 112                    | -0.63 (destabilising)   | 1          |
| 137                | L137   | M137        | M137 | M137 | M137  | 2               | 37                     | -0.649 (destabilising)  | 1          |
| 212                | Y212   | F212        | F212 | F212 | F212  | 3               | 0                      | -0.692 (destabilising)  | 1          |
| 274                | R274   | K274        | K274 | K274 | K274  | 2               | 92                     | -0.548 (destabilising)  | 1          |
| 279                | A279   | S279        | S279 | S279 | S279  | 1               | 60                     | -0.822 (destabilising)  | 1          |
| 374                | R374   | K374        | K374 | K374 | K374  | 2               | 103                    | -0.836 (destabilising)  | 1          |
| 416                | N416   | K416        | K416 | K416 | K416  | 0               |                        |                         | 1          |
| 421                | Q421   | Y421        | Y421 | Y421 | Y421  | -1              |                        |                         | 1          |
| 426                | E426   | D426        | D426 | D426 | D426  | 2               |                        |                         | 1          |
| 435                | N435   | D435        | D435 | D435 | D435  | 1               |                        |                         | 1          |
| 443                | E443   | D443        | D443 | D443 | D443  | 2               |                        |                         | 1          |
| 453                | I453   | T453        | T453 | T453 | T453  | -1              |                        |                         | 1          |

|     |      |      |      |      |      |    |     |                           |   |
|-----|------|------|------|------|------|----|-----|---------------------------|---|
| 492 | E492 | D492 | D492 | D492 | D492 | 2  |     |                           | 1 |
| 497 | A497 | P497 | P497 | P497 | P497 | -1 |     |                           | 2 |
| 535 | (-)  | P526 | P526 | P526 | P526 |    |     |                           | 1 |
| 572 | S563 | T563 | T563 | T563 | T563 | 1  |     |                           | 1 |
| 574 | V565 | I565 | I565 | I565 | I565 | 3  |     |                           | 1 |
| 611 | T602 | P602 | P602 | P602 | N602 | -1 |     |                           | 4 |
| 651 | Q641 | N641 | N641 | N641 | K641 | 0  |     |                           | 2 |
| 715 | R705 | A705 | A705 | A705 | A705 | -1 | 24  | -1.037<br>(destabilising) | 1 |
| 726 | N716 | D716 | D716 | D716 | D716 | 1  | 123 | 0.141<br>(stabilising)    | 1 |
| 727 | N717 | G717 | G717 | G717 | G717 | 0  | 75  | -0.461<br>(destabilising) | 2 |

**Supplementary Table 6. NP SDPs.** The position in the multiple sequence alignment, the amino acid position, and amino acid present in each of the species is shown. The BLOSUM62 score represents how frequently such amino acid changes are observed in nature. SASA is the solvent accessible surface area, which is only available for SDPs that could be mapped to protein structure. SASA was calculated using the protein structure with PDB code 4QB0 for the C terminal and 4YPI for the N terminal regions. RESTV, Reston virus; EBOV, Ebola virus; B, Bundibugyo virus; SUDV, Sudan virus; TAFV, Tai Forest virus. The s3det rank column shows the ranking of the SDPs by s3det. The s3det column shows the ranking of the SDPs by s3det.

| Alignment position | RESTV         | EBOV          | BDBV | SUDV  | TAFV | BLOSUM 62 Score | SASA ( $\text{\AA}^2$ ) | mCSM ( $\Delta \Delta G$ , Kcal/mol) | S3det rank |
|--------------------|---------------|---------------|------|-------|------|-----------------|-------------------------|--------------------------------------|------------|
| 2                  | G2            | M1            | M1   | M1    | M1   | -3              |                         |                                      | 1          |
| 3                  | S3            | G2            | V2   | E2/G2 | G2   | 0               |                         |                                      | 8          |
| 32                 | I32           | F31           | F31  | F31   | F31  | 0               |                         |                                      | 1          |
| 38                 | I38           | V37           | V37  | V37   | V37  | 3               | 0                       | -0.828 (destabilising)               | 1          |
| 46                 | A46           | V45           | V45  | V45   | V45  | 0               | 30                      | -1.276 (destabilising)               | 1          |
| 76                 | I76           | V75           | V75  | V75   | V75  | 3               | 44                      | -0.295 (destabilising)               | 1          |
| 197                | A197          | S196          | S196 | S196  | S196 | 1               |                         |                                      | 1          |
| 208                | D208          | E207          | T207 | E207  | T207 | 2               |                         |                                      | 9          |
| 211                | T211          | S210          | S210 | S210  | S210 | 1               |                         |                                      | 1          |
| 261                | L261          | I260          | I260 | I260  | I260 | 2               | 25                      | -0.95 (destabilising)                | 1          |
| 270                | S270          | T269          | T269 | T269  | T269 | 1               | 99                      | -0.432 (destabilising)               | 1          |
| 308                | H308          | S308/<br>L307 | S308 | S308  | S308 | -1              |                         |                                      | 2          |
| 326                | G326          | R325          | V325 | R325  | V325 | -2              |                         |                                      | 9          |
| 355                | L355          | H354          | R354 | H354  | Q354 | -3              |                         |                                      | 9          |
| 404                | P401          | Q403          | N401 | Q397  | S401 | -1              |                         |                                      | 9          |
| 419                | E412          | S418          | A409 | S412  | T409 | 0               |                         |                                      | 9          |
| 461                | P449          | T448          | S442 | T448  | T448 | -1              |                         |                                      | 7          |
| 497                | Y517/<br>H517 | H516          | H516 | H516  | H516 | 2               |                         |                                      | 6          |
| 519                | K499          | R498          | R498 | R498  | R498 | 2               |                         |                                      | 1          |
| 521                | K501          | R500          | R500 | R500  | R500 | 2               |                         |                                      | 1          |
| 535                | D515          | N514          | N514 | N514  | N514 | 1               | 59                      | -1.142 (destabilising)               | 1          |
| 542                | V522          | Q521          | Q521 | Q521  | L521 | 2               | 19                      | 0.037 (stabilising)                  | 6          |

|     |      |      |      |      |      |    |    |                               |   |
|-----|------|------|------|------|------|----|----|-------------------------------|---|
| 568 | V548 | L547 | I547 | L547 | I547 | 1  | 74 | -<br>1.258<br>(destabilising) | 9 |
| 605 | L585 | I584 | I584 | I584 | I584 | 2  |    |                               | 1 |
| 628 | S608 | D607 | D607 | D607 | D607 | 0  |    |                               | 1 |
| 643 | E623 | K622 | K622 | K622 | K622 | 1  |    |                               | 1 |
| 659 | H639 | Q638 | Q638 | Q638 | Q638 | 0  |    |                               | 1 |
| 663 | L643 | D642 | D642 | D642 | S642 | -4 |    |                               | 6 |
| 665 | L645 | W644 | W644 | W644 | W644 | -2 |    |                               | 1 |
| 680 | I660 | T569 | T569 | T569 | T569 | -1 |    |                               | 1 |

**Supplementary Table 7. GP SDPs.** The position in the multiple sequence alignment, the amino acid position, and amino acid present in each of the species is shown. The BLOSUM62 score represents how frequently such amino acid changes are observed in nature. SASA is the solvent accessible surface area, which is only available for SDPs that could be mapped to protein structure. SASA was calculated using the protein structure with PDB code 3CSY. RESTV, Reston virus; EBOV, Ebola virus; B, Bundibugyo virus; SUDV, Sudan virus; TAFV, Taï Forest virus. The s3det rank column shows the ranking of the SDPs by s3det. The s3det column shows the ranking of the SDPs by s3det.



| Alignment position | RESTV | EBOV | BDBV | SUDV | TAFV | BLOSUM 62 SCORE | SASA (Å <sup>2</sup> ) | S3det rank |
|--------------------|-------|------|------|------|------|-----------------|------------------------|------------|
| 47                 | G2    | M1   | M1   | M1   | M1   | -3              |                        | 1          |
| 77                 | I32   | F31  | F31  | F31  | F31  | 0               |                        | 1          |
| 83                 | I38   | V37  | V37  | V37  | V37  | 3               | 21                     | 1          |
| 91                 | A46   | V45  | V45  | V45  | V45  | 0               | 84                     | 1          |
| 121                | I76   | V75  | V75  | V75  | V75  | 3               | 61                     | 1          |
| 242                | A197  | S196 | S196 | S196 | S196 | 1               |                        | 1          |
| 256                | T211  | S210 | S210 | S210 | S210 | 1               |                        | 1          |
| 306                | L261  | I260 | I260 | I260 | I260 | 2               | 20                     | 1          |
| 315                | S270  | T269 | T269 | T269 | T269 | 1               | 48                     | 1          |

**Supplementary Table 8. sGP SDPs.** The position in the multiple sequence alignment, the amino acid position, and amino acid present in each of the species is shown. The BLOSUM62 score represents how frequently such amino acid changes are observed in nature. SASA is the solvent accessible surface area, which is only available for SDPs that could be mapped to protein structure. SASA was calculated using the Phyre2 structural model that used template structure 3s88l. RESTV, Reston virus; EBOV, Ebola virus; B, Bundibugyo virus; SUDV, Sudan virus; TAFV, Taï Forest virus. The s3det rank column shows the ranking of the SDPs by s3det. The s3det column shows the ranking of the SDPs by s3det.

| Alignment position | RESTV | EBOV  | BDB V | SUDV  | TAF V | BLOSUM62 SCORE | SASA (Å <sup>2</sup> ) | mCSM (Δ Δ G, Kcal/mol) | S3det rank |
|--------------------|-------|-------|-------|-------|-------|----------------|------------------------|------------------------|------------|
| 67                 | T66   | V66   | V66   | V66   | V66   | 0              |                        |                        | 1          |
| 110                | H109  | Q109  | Q109  | Q109  | Q109  | 0              |                        |                        | 1          |
| 137                | L136  | I136  | I136  | I136  | I136  | 2              |                        |                        | 1          |
| 147                | V146  | L146  | L146  | L146  | L146  | 1              |                        |                        | 1          |
| 222                | S221  | A221  | A221  | A221  | A221  | 1              |                        |                        | 1          |
| 224                | L223  | Q223  | Q223  | Q223  | Q223  | -2             |                        |                        | 1          |
| 228                | Q227  | H227  | H227  | H227  | H227  | 0              |                        |                        | 1          |
| 277                | I276  | L276  | L276  | L276  | L276  | 2              | 42                     | -1.049 (destabilising) | 1          |
| 284                | V283  | L283  | L283  | L283  | L283  | 1              |                        |                        | 1          |
| 313                | F312  | Y312  | Y312  | Y312  | Y312  | 3              |                        |                        | 1          |
| 327                | S326  | A326  | A326  | A326  | A326  | 1              |                        |                        | 1          |
| 331                | D330  | T330  | T330  | T330  | T330  | -1             |                        |                        | 1          |
| 351                | D350  | E350  | E350  | E350  | E350  | 2              |                        |                        | 1          |
| 362                | S361  | T361  | T361  | T361  | T361  | 1              |                        |                        | 1          |
| 366                | F365  | L365  | L365  | L365  | L365  | 0              |                        |                        | 1          |
| 380                | I379  | V379  | V379  | V379  | V379  | 3              |                        |                        | 1          |
| 448                | H447  | Q447  | Q447  | Q447  | Q447  | 0              |                        |                        | 1          |
| 451                | S450  | P450  | P450  | P450  | P450  | -1             |                        |                        | 1          |
| 466                | N465  | D465  | D465  | D465  | D465  | 1              |                        |                        | 1          |
| 690                | S689  | E689  | E689  | E689  | E689  | 0              |                        |                        | 1          |
| 848                | A847  | S847  | S847  | S847  | S847  | 1              |                        |                        | 1          |
| 869                | A868  | S868  | S868  | S868  | S868  | 1              |                        |                        | 1          |
| 897                | Y896  | F896  | F896  | F896  | F896  | 3              |                        |                        | 1          |
| 926                | F925  | L925  | L925  | L925  | L925  | 0              |                        |                        | 1          |
| 955                | S954  | A954  | A954  | A954  | A954  | 1              |                        |                        | 1          |
| 996                | T995  | S995  | S995  | S995  | S995  | 1              |                        |                        | 1          |
| 1025               | N1024 | T1024 | T1024 | T1024 | T1024 | 0              |                        |                        | 1          |
| 1074               | K1073 | R1073 | R1073 | R1073 | R1073 | 2              |                        |                        | 1          |
| 1120               | S1119 | A1119 | A1119 | A1119 | A1119 | 1              |                        |                        | 1          |
| 1164               | A1161 | F1163 | F1163 | F1163 | F1163 | -2             |                        |                        | 1          |
| 1190               | S1187 | D1189 | D1189 | D1189 | D1189 | 0              |                        |                        | 1          |
| 1215               | S1212 | A1214 | A1214 | A1214 | A1214 | 1              |                        |                        | 1          |
| 1218               | K1215 | R1217 | R1217 | R1217 | R1217 | 2              |                        |                        | 1          |
| 1238               | E1235 | D1237 | D1237 | D1237 | D1237 | 2              |                        |                        | 1          |
| 1256               | V1253 | I1255 | I1255 | I1255 | I1255 | 3              |                        |                        | 1          |
| 1355               | K1532 | R1534 | R1534 | R1534 | R1534 | 2              |                        |                        | 1          |

|      |       |       |           |       |           |    |  |  |   |
|------|-------|-------|-----------|-------|-----------|----|--|--|---|
|      |       |       | 4         |       | 4         |    |  |  |   |
| 1367 | A1354 | T1366 | T136<br>6 | T1366 | T136<br>6 | 0  |  |  | 1 |
| 1396 | T1393 | S1395 | S139<br>5 | S1395 | S139<br>5 | 1  |  |  | 1 |
| 1409 | M1406 | I1408 | I1408     | I1408 | I1408     | 1  |  |  | 1 |
| 1415 | L1412 | I1414 | I1414     | I1414 | I1414     | 2  |  |  | 1 |
| 1437 | N1434 | S1436 | S143<br>6 | S1436 | S143<br>6 | 1  |  |  | 1 |
| 1462 | Q1459 | K1461 | K146<br>1 | K1461 | K146<br>1 | 1  |  |  | 1 |
| 1474 | C1471 | S1473 | S147<br>3 | S1473 | S147<br>3 | -1 |  |  | 1 |
| 1489 | Y1486 | L1488 | L148<br>8 | L1488 | L148<br>8 | -1 |  |  | 1 |
| 1500 | L1497 | I1499 | I1499     | I1499 | I1499     | 2  |  |  | 1 |
| 1507 | A1504 | S1506 | S150<br>6 | S1506 | S150<br>6 | 1  |  |  | 1 |
| 1510 | V1507 | I1509 | I1509     | I1509 | I1509     | 3  |  |  | 1 |
| 1539 | S1536 | A1535 | A153<br>5 | A1535 | A153<br>5 | 1  |  |  | 1 |
| 1627 | Y1624 | L1624 | L162<br>4 | L1624 | L162<br>4 | -1 |  |  | 1 |
| 1631 | S1628 | C1628 | C162<br>8 | C1628 | C162<br>8 | -1 |  |  | 1 |
| 1786 | I1760 | V1762 | V176<br>2 | V1762 | V176<br>2 | 3  |  |  | 1 |
| 1874 | T1848 | V1850 | V185<br>0 | V1850 | V185<br>0 | 0  |  |  | 1 |
| 1897 | S1871 | T1873 | T187<br>3 | T1873 | T187<br>3 | 1  |  |  | 1 |
| 1941 | N1914 | R1916 | R191<br>6 | R1916 | R191<br>6 | 1  |  |  | 1 |
| 1966 | R1939 | E1941 | E194<br>1 | E1941 | E194<br>1 | 0  |  |  | 1 |
| 2033 | I2006 | L2008 | L200<br>8 | L2008 | L200<br>8 | 2  |  |  | 1 |
| 2069 | I2042 | L2044 | L204<br>4 | L2044 | L204<br>4 | 2  |  |  | 1 |
| 2102 | T2075 | S2077 | S207<br>7 | S2077 | S207<br>7 | 1  |  |  | 1 |
| 2123 | D2096 | E2098 | E209<br>8 | E2098 | E209<br>8 | 2  |  |  | 1 |
| 2130 | L2130 | Q2105 | Q210<br>5 | Q2105 | Q210<br>5 | -2 |  |  | 1 |
| 2133 | E2106 | Q2108 | Q210<br>8 | Q2108 | Q210<br>8 | 2  |  |  | 1 |
| 2156 | F2129 | Y2131 | Y213<br>1 | Y2131 | Y213<br>1 | 3  |  |  | 1 |
| 2182 | V2155 | L2157 | L215<br>7 | L2157 | L215<br>7 | 1  |  |  | 1 |
| 2193 | N2171 | R2168 | R216<br>8 | R2168 | R216<br>8 | 0  |  |  | 1 |
| 2200 | K2173 | R2175 | R217      | R2175 | R217      | 2  |  |  | 1 |

|      |       |           |           |       |           |   |  |  |   |
|------|-------|-----------|-----------|-------|-----------|---|--|--|---|
|      |       |           | 5         |       | 5         |   |  |  |   |
| 2202 | F2175 | L2177     | L217<br>7 | L2177 | L217<br>7 | 0 |  |  | 1 |
| 2211 | L2184 | M218<br>6 | M218<br>6 | M2186 | M218<br>6 | 2 |  |  | 1 |

**Supplementary Table 9. L SDPs.** The position in the multiple sequence alignment, the amino acid position, and amino acid present in each of the species is shown. The BLOSUM62 score represents how frequently such amino acid changes are observed in nature. SASA is the solvent accessible surface area, which is only available for SDPs that could be mapped to protein structure. SASA was calculated using the Phyre2 structural model which used template 4n48A (“cap-specific mrna (nucleoside-2'-o-)-methyltransferase 1 protein in2 complex with capped rna fragment”). RESTV, Reston virus; EBOV, Ebola virus; B, Bundibugyo virus; SUDV, Sudan virus; TAFV, Taï Forest virus. The s3det rank column shows the ranking of the SDPs by s3det. The s3det column shows the ranking of the SDPs by s3det.

| Protein | EBOV Res | RESTV Res | Mutation position | Mutation    | Effect                                      |
|---------|----------|-----------|-------------------|-------------|---------------------------------------------|
| GP      | Q638     | H         | 638               | Q → V       | No effect on release of soluble GP1,2delta. |
| GP      | R498     | K         | 498-501           | RTRR → ATAA | No effect on cleavage between GP1 and GP2.  |
| GP      | D642     | L         | 642               | D → V       | No effect on release of soluble GP1,2delta. |
| VP24    | M136     | L         | 134/136           | F-A/M-A     | Near complete loss of KPNA5 binding *       |
| VP24    | Q139     | R         | 137-139           | RTQ → AAA   | Near complete loss of KPNA5 binding *       |

**Supplementary Table 10. SDPs that coincide with known mutagenesis data.** Functional data extracted from UniProt unless stated. Res, residue; EBOV, Ebola virus; RESTV, Reston virus

\*Data from Bornholdt et al.,<sup>35</sup>

| PROTEIN         | SPECIES | OLIGOMERIC STATE       | PDB/TEMPLATE     | REGION IN SEQUENCE |
|-----------------|---------|------------------------|------------------|--------------------|
| GP              | EBOV    | Trimer of Heterodimers | 3CSY (structure) | 31-310<br>502-599  |
| sGP             | EBOV    | Dimer                  | 3s88I (model)    | 32-287             |
| sGP             | RESTV   | Dimer                  | 3s88I (model)    | 33-288             |
| L               | EBOV    | Monomer                | 4n48A (model)    | 223-328            |
| NP (C-terminal) | EBOV    | Monomer                | 4QB0 (structure) | 645-739            |
| NP (N-terminal) | EBOV    | Monomer                | 4YPI (structure) | 39-384             |
| VP24            | EBOV    | Heterodimer            | 4M0Q (structure) | 10-231             |
| VP24            | EBOV    | Heterodimer            | 4U2X (structure) | 16-231             |
| VP24            | RESTV   | Dimer                  | 4D9O (structure) | 10-231             |
| VP30            | EBOV    | Dimer                  | 2I8B (structure) | 140-266            |
| VP30            | RESTV   | Dimer                  | 3V70 (structure) | 142-272            |
| VP35            | EBOV    | Heterodimer            | 4IBB (structure) | 218-340            |
| VP35            | EBOV    | Dimer of heterodimers  | 3L25 (structure) | 209-340            |
| VP35            | RESTV   | Dimer of heterodimers  | 3KS8 (structure) | 208-329            |
| VP40            | EBOV    | Monomer                | 1ES6 (structure) | 44-321             |
| VP40            | EBOV    | Dimer                  | 4LDB (structure) | 44-319             |
| VP40            | EBOV    | Hexamer                | 4LDD (structure) | 45-188             |
| VP40            | EBOV    | Octamer                | 4LDM (structure) | 69-188             |
| VP40            | RESTV   | Monomer                | 1es6A (model)    | 44-321             |

**Supplementary Table 11. Protein structures available for Ebolavirus Proteins.** EBOV, Ebola virus; RESTV, Reston virus

| Reston virus residue | Pathogenic consensus | Comments                                                                                                                                                                                                                                                                                                                                                                                                                                      | Functional effect |
|----------------------|----------------------|-----------------------------------------------------------------------------------------------------------------------------------------------------------------------------------------------------------------------------------------------------------------------------------------------------------------------------------------------------------------------------------------------------------------------------------------------|-------------------|
| I32                  | F31                  | Note- Ebola virus GP structure has R31 rather than F31. Surface residue close to interface with GP2 in the trimer. Unclear what functional effect may be if any.                                                                                                                                                                                                                                                                              | unclear           |
| I38                  | V37                  | Surface residue, appears to be a conservative change of amino acid that could be well tolerated                                                                                                                                                                                                                                                                                                                                               | unlikely          |
| A46                  | V45                  | Also a surface residue. Conservative change of hydrophobic amino acid that could be well accommodated.                                                                                                                                                                                                                                                                                                                                        | unlikely          |
| I76                  | V75                  | Surface residue, conservative change of amino acid . Change should be well accommodated                                                                                                                                                                                                                                                                                                                                                       | unlikely          |
| L261                 | I260                 | One of three SDPs located in the glycan cap region of GP1. The glycan cap binds the host cell receptor(s) but is highly glycosylated so it is not clear if the amino acids directly contact the host cell. Surface residue in a cavity. It is part packed quite tightly with residue F234, V236, T240 but should be possible to accommodate change to Leu in Reston virus. Could there be a role with the three SDPs combined in this region. | possible*         |
| S270                 | T269                 | Located at the top of the structure, is a surface residue (with side chain pointing to the solvent) representing a conservative amino acid change. Again could it have a role in conjunction with the 2 other SDPs in this region?                                                                                                                                                                                                            | possible*         |
| H308                 | S308/<br>L307        | Also located in the glycan cap and also a surface residue. Present in loop so unlikely to alter structure but could have a functional role, and alters charge on the protein surface.                                                                                                                                                                                                                                                         | possible*         |
| D515                 | N514                 | Surface residue, results in loss of negative charge in Reston virus GP. Located at the end of a beta sheet. Seems unlikely to have a structural effect. Possible combined effect with adjacent L547V?                                                                                                                                                                                                                                         | unlikely          |
| V522                 | Q521                 | Close to trimer interface (GP2-GP2) but directly within the interface. Not clear what effect this change would have on protein structure                                                                                                                                                                                                                                                                                                      | unclear           |
| V548                 | L547                 | Surface residue at end of a beta sheet. Appears to be minor change in amino acid. Possible combined effect with adjacent N514D?                                                                                                                                                                                                                                                                                                               | unlikely          |
| L585                 | I584                 | Largely buried amino acid. At the interface with GP1 (in the same GP monomer). EBOV I584 interacts with F572, not clear if this interaction would change in with Leu in Reston virus.                                                                                                                                                                                                                                                         | unlikely          |

**Supplementary Table 12. Structural analysis of GP SDPs.** Details of the structural analysis are included with an assessment of whether the amino acid change is likely to have an effect on the protein. Four categories are used for the effect column unlikely (the change seems unlikely to alter the structure/function), unclear (the change could be functional but there is limited evidence), possible (more confident that there is an effect than the unclear group) and probably (highly confident that the change will have a structural/functional effect).

| Reston virus residue | Pathogenic consensus | Comments                                                                                                                                                                                                                                                                                                                                                                                                                                                                                                                                                              | Functional effect |
|----------------------|----------------------|-----------------------------------------------------------------------------------------------------------------------------------------------------------------------------------------------------------------------------------------------------------------------------------------------------------------------------------------------------------------------------------------------------------------------------------------------------------------------------------------------------------------------------------------------------------------------|-------------------|
| K39                  | R39                  | R39 forms a H bond with D71. Change to K is likely to maintain this H bond.                                                                                                                                                                                                                                                                                                                                                                                                                                                                                           | unlikely          |
| S42                  | P42/<br>Q42          | Unusual to see Pro in a sheet. The amino acid is on the protein surface and it there is nothing to suggest that a change to Ser would alter the protein                                                                                                                                                                                                                                                                                                                                                                                                               | unclear           |
| V56                  | I56                  | I56 is largely buried and packed against other sidechains. While change to Val would reduce the size of the side chain, it seems likely that it would be accommodated within the structure. Also V64I is adjacent to this SDP.                                                                                                                                                                                                                                                                                                                                        | unlikely          |
| I64                  | V64                  | In a surface loop facing the helix containing I56V. Possible co-evolution with I56 – reduce size in one, matched with increased size in the other.                                                                                                                                                                                                                                                                                                                                                                                                                    | unlikely          |
| K105                 | R105                 | The side chain guanidino group of R105 provides a hydrogen bond with the side chain of Q38 as well as with the local backbone NH of G103 to provide a stabilized region of the protein. Although the mutation R105K appears conservative and maintains the side chain positive charge, the ability to form multiple hydrogen bonds is reduced due to resonance stabilization in the guanidino group being lost in the transfer to the lysine side chain amino group. This has the potential to weaken interactions in this region.                                    | possible          |
| L137                 | M137                 | M137 is located at the end of helix and packs against an adjacent helix. The conservative change to L137 in Reston virus seems unlikely to have a significant effect on structure/function                                                                                                                                                                                                                                                                                                                                                                            | unlikely          |
| Y212                 | F212                 | A minor change in side chains. P212 is located in an alpha helix and the sidechain is largely buried. The change to Y212 in Reston virus is unlikely to have a significant effect on protein structure/function                                                                                                                                                                                                                                                                                                                                                       | unlikely          |
| R274                 | K274                 | K274 is located in the VP35 binding site. K274 forms a hydrogen bond with VP35 D46 and a change to Arg should be able to maintain this interaction.                                                                                                                                                                                                                                                                                                                                                                                                                   | unlikely          |
| A279                 | S279                 | S279 is located in an alpha helix on the protein surface. The change to A279 in Reston virus would introduce a hydrophobic amino acid on the protein surface that could have an effect on protein structure.                                                                                                                                                                                                                                                                                                                                                          | unclear           |
| R374                 | K374                 | K374 is located in an alpha helix on the protein surface. It is not unlikely that the change to R374 in Reston virus will alter protein structure. It is a conservative change of side chain.                                                                                                                                                                                                                                                                                                                                                                         | unlikely          |
| R705                 | A705                 | A695 is located on the protein surface so the charge introduce by the change to R695 in Reston virus should be tolerated. Proximity of Reston virus R705 to E694 may result in a salt bridge that would reduce flexibility in Reston virus NP. There could different hydrodynamic volumes between the Reston virus and pathogenic NP proteins as well as in the pathogenic ebolaviruses exposing residues that remain buried in the Reston virus NP. The salt bridge could make RESTV more thermostable (and possibly more resistant to proteolysis and denaturants). | Possible          |
| N716                 | D716                 | Present in a surface loop this change will change the charge properties. Should be considered with adjacent amino acid, which is also an SDP. Overall we see the removal of a negatively charged amino acid with two polar side chains.                                                                                                                                                                                                                                                                                                                               | unclear           |
| N717                 | G717                 | Adjacent to D716N pSDP. The loss of Gly would change the turn from type1 to a type 2 turn. Also See comment above.                                                                                                                                                                                                                                                                                                                                                                                                                                                    | unclear           |

**Supplementary Table 13.** Structural analysis of NP SDPs. Details of the structural analysis are included



with an assessment of whether the amino acid change is likely to have an effect on the protein. Four categories are used for the effect column unlikely (the change seems unlikely to alter the structure/function), unclear (the change could be functional but there is limited evidence), possible (more confident that there is an effect than the unclear group) and probably (highly confident that the change will have a structural/functional effect).

| Reston virus Residue | Pathogenic consensus | Comments                                                                                                                                                                                                                                                                                                                                                                                                                                                                                                                 | Functional effect |
|----------------------|----------------------|--------------------------------------------------------------------------------------------------------------------------------------------------------------------------------------------------------------------------------------------------------------------------------------------------------------------------------------------------------------------------------------------------------------------------------------------------------------------------------------------------------------------------|-------------------|
| D258                 | E269                 | Present in dimer interface (only for one of the subunits as the dimer is asymmetric). Forms hydrogen bonds with R301, R311 and W313 (RESTV numbering). Distances between atoms are slightly different between the 2 species. W324 3.1A (2.8 in Ebola virus), R301 3.2A (2.9 in Ebola virus) R322 2.8 and 3.0 (both 2.8A in Ebola virus). Also close to A303 across interface, they could compensate or presence of both changes could have greater effect on interface in this area. (6.1A in RESTV, 7.5 in Ebola virus) | probable          |
| V279                 | A290                 | Present in a surface loop packs against adjacent helix, conservative change of hydrophobic amino acid. Could be some local conformational changes and is located adjacent to the linker between the two subdomains, which is in RESTV has a short alpha helix that is not present in EBOV.                                                                                                                                                                                                                               | Unclear           |
| A303                 | V314                 | Present in a surface loop near the VP35 dimer interface. Close in space to D258 in the other subunit.                                                                                                                                                                                                                                                                                                                                                                                                                    | unclear           |
| K318                 | Q329                 | Located at the end of a beta sheet. Adjacent to His285 in next strand. His285 is completely conserved in all <i>Ebolavirus</i> species. So Reston virus VP35 has increased positive charge in this position                                                                                                                                                                                                                                                                                                              | unclear           |

**Supplementary Table 14. Structural analysis of VP35 SDPs.** Details of the structural analysis are included with an assessment of whether the amino acid change is likely to have an effect on the protein. Four categories are used for the effect column unlikely (the change seems unlikely to alter the structure/function), unclear (the change could be functional but there is limited evidence), possible (more confident that there is an effect than the unclear group) and probably (highly confident that the change will have a structural/functional effect).

| RESTV residue | Pathogenic consensus | Comments                                                                                                                                                                                                                                                                                                                                                                                                                                                                                      | functional effect |
|---------------|----------------------|-----------------------------------------------------------------------------------------------------------------------------------------------------------------------------------------------------------------------------------------------------------------------------------------------------------------------------------------------------------------------------------------------------------------------------------------------------------------------------------------------|-------------------|
| I151          | T150                 | The side chain is largely buried and it appears that Reston virus I151 would be tolerated although a hydrogen bond with the backbone of the previous turn of the helix will be lost.                                                                                                                                                                                                                                                                                                          | unlikely          |
| R158          | Q157                 | Located in a surface loop, will increase surface charge. It is possible that Reston virus forms a salt bridge with D159, which would increase stability and reduce flexibility in this area of the protein. This SDP is in a region of SDPs and very close to another SDP (I159L). So possible effects may be compensated by other changes.                                                                                                                                                   | unlikely          |
| L160          | I159                 | Located in a surface close to another SDP (see above). Appears to be a conservative change that given the other species specific changes in this area it seems unlikely that it will have a functional effect on the protein.                                                                                                                                                                                                                                                                 | unlikely          |
| H197          | R196                 | Surface residue so change in size/shape should well accommodated, positive charge maintained in side chain.                                                                                                                                                                                                                                                                                                                                                                                   | unlikely          |
| D206          | E205                 | Exposed surface residue, conservative change of amino acid. Unlikely to alter protein structure.                                                                                                                                                                                                                                                                                                                                                                                              | unlikely          |
| A263          | R262                 | This residue is present in the dimer interface. In Ebola virus VP30 R262 hydrogen bonds with the backbone of A141 and G140. Reston virus A263 will be unable to hydrogen bond. This is likely to reduce the affinity of the dimer (given that it is symmetrical and so the Ebola virus R262 in each subunit forms hydrogen bonds with the other subunit. The Reston virus dimer has been observed to be rotated relative to the Ebola virus. The loss of the hydrogen bonds may explain this. | probable          |

**Supplementary Table 15. Structural analysis of VP30 SDPs.** Details of the structural analysis are included with an assessment of whether the amino acid change is likely to have an effect on the protein. Four categories are used for the effect column unlikely (the change seems unlikely to alter the structure/function), unclear (the change could be functional but there is limited evidence), possible (more confident that there is an effect than the unclear group) and probably (highly confident that the change will have a structural/functional effect).

| Reston virus residue | Pathogenic consensus | Comments                                                                                                                                                                                                                                                                                                                                                                                                                                                                                      | Possible Functional effect |
|----------------------|----------------------|-----------------------------------------------------------------------------------------------------------------------------------------------------------------------------------------------------------------------------------------------------------------------------------------------------------------------------------------------------------------------------------------------------------------------------------------------------------------------------------------------|----------------------------|
| V46                  | T46                  | Present in a surface loop (although only third amino acid in structure). Reston virus V46 introduces a hydrophobic amino acid on surface, could affect stability but no evidence for this.                                                                                                                                                                                                                                                                                                    | unclear                    |
| T85                  | P85                  | Ebola virus P85 is in a S-G-P-K beta-turn, proline confers backbone rigidity and change to Thr in Reston virus would introduce backbone flexibility and provide a side chain with H-bond donor. Located in the Ebola virus octamer interface, will result in changes to this interface and likely alter the octamer structure. In an octamer structure (if it were to remain similar to the Ebola virus octamer), T85 could hydrogen bond with the backbone of L117 or the sidechain of R137. | probably                   |
| V122                 | I122                 | This change appears to be conservative substitution of two hydrophobic amino acids. Ebola virus I122 is packed with other hydrophobic residues and it appears that the region would be able to accommodate the change to Reston virus V122 with a slightly smaller side chain.                                                                                                                                                                                                                | unlikely                   |
| N201                 | G201                 | Located in a surface loop. Based on the Ebola virus structure, the Reston virus N201 side chain would be likely to point into the protein structure. But not clear what effect this would have on the protein structure, if any given that the structure has gaps in this region so cannot be confident.                                                                                                                                                                                      | unclear                    |
| L209                 | F209                 | Packed in a largely hydrophobic region the SDP results in a reduction in side chain size in Reston virus. The smaller Leucine may adopt different side chain conformations to aid stability. Ebola virus F209 does not interact with other aromatic side chains so the structure is unlikely to be adversely affected by the swap to Leucine. Surrounding hydrophobic residues are aliphatic (I261, I285, V298, A318, P317) so the change to Leucine could be well accommodated.              | unlikely                   |
| P245                 | Q245                 | Located at the end of an alpha helix, the Reston virus P245 would break the helix and shorten it to either L244 or more likely M241, which is a better C-capping residue. This could have a destabilizing effect on the two helices in this region and the base of the hydrophobic core because secondary structure will most likely change to accommodate the inflexible Proline.                                                                                                            | probably                   |
| Q269                 | H269                 | A surface residue, loss of charge to polar side chain. This is a highly charged region with E265, R270, K274, K275. So the positive charge would be reduced in Reston virus VP40.                                                                                                                                                                                                                                                                                                             | unclear                    |
| V293                 | I293                 | Packs with other hydrophobic residues. Appears to be a conservative change                                                                                                                                                                                                                                                                                                                                                                                                                    | Unlikely                   |

**Supplementary Table 16. Structural analysis of VP40 SDPs.** Details of the structural analysis are included with an assessment of whether the amino acid change is likely to have an effect on the protein. Four categories are used for the effect column unlikely (the change seems unlikely to alter the structure/function), unclear (the change could be functional but there is limited evidence), possible (more confident that there is an effect than the unclear group) and probably (highly confident that the change will have a structural/functional effect). Analysis is based on the VP40 dimer structure unless otherwise stated.

| Reston virus residue | Pathogenic consensus | Comments                                                                                                                                                                                                                                                                                                      | Possible functional effect |
|----------------------|----------------------|---------------------------------------------------------------------------------------------------------------------------------------------------------------------------------------------------------------------------------------------------------------------------------------------------------------|----------------------------|
| M17                  | L17                  | Located in a helix. Appears to be a conservative change in amino acid. No suggestion from structure that it would alter structure/function.                                                                                                                                                                   | unlikely                   |
| I22                  | V22                  | Located in a helix and is fairly tightly packed against the adjacent helix but would expect the pocket to accommodate the change.                                                                                                                                                                             | unlikely                   |
| I31                  | V31                  | Located in a sheet facing a loop. Side chain is relatively exposed so structure should be able to accommodate. Adjacent in space to another SDP (132)                                                                                                                                                         | unlikely                   |
| S131                 | T131                 | Ebola virus T131 forms hydrogen bonds with the side chains of T129, W125 and with the backbone of H133. Model of Reston virus VP24 suggests S131 would continue to interact with the same residues. This residue is on the edge of the KPNA5 binding site. Appears to be a conservative change of amino acid. | probable                   |
| T132                 | N132                 | Exposed polar residue exchanges for another polar residue. Unlikely to affect structure. Adjacent in space to an SDP (V31S) and in sequence to 131.                                                                                                                                                           | unlikely                   |
| L136                 | M136                 | Part of the interface site with KPNA5. Mutagenesis of M136 in combination with other residues resulted in loss of KPNA5 binding <sup>34</sup> . Although it appears to be a conservative substitution.                                                                                                        | probable                   |
| R139                 | Q139                 | Interface residue. In Ebola virus Q139 forms an H bond with the backbone of R137. This is likely to be lost in Reston virus VP24 with the longer R139 side chain. Change will also introduce positive charge at interface site.                                                                               | probable                   |
| A226                 | T226                 | Located in a helix facing a sheet. Ebola virus T226 forms a hydrogen bond with the backbone of D48. Reston virus A226 will not be able to form this hydrogen bond. This is likely to reduce the stability of the protein and increase flexibility.                                                            | Probable                   |

**Supplementary Table 17. Structural analysis of VP24 SDPs.** Details of the structural analysis are included with an assessment of whether the amino acid change is likely to have an effect on the protein. Four categories are used for the effect column unlikely (the change seems unlikely to alter the structure/function), unclear (the change could be functional but there is limited evidence), possible (more confident that there is an effect than the unclear group) and probably (highly confident that the change will have a structural/functional effect).

| Region | Residue | Conservation                                                                                               |
|--------|---------|------------------------------------------------------------------------------------------------------------|
| 1      | L136    | SDP                                                                                                        |
| 1      | R139    | SDP                                                                                                        |
| 1      | S140    | Not an SDP but conserved S in Reston viruses and mainly R in Ebola viruses, not conserved enough to be SDP |
|        |         |                                                                                                            |
| 2      | L107    | Vary in species specific manner                                                                            |
| 2      | H109    | Vary in species specific manner                                                                            |
| 2      | T116    | Vary in species specific manner                                                                            |
| 2      | G120    | Not an SDP – G in Reston viruses and Ebola viruses (mainly), differs in others                             |
|        |         |                                                                                                            |
| 3      | S184    |                                                                                                            |
| 3      | T185    | Not an SDP. T in Reston viruses, mainly N in other species                                                 |
| 3      | H186    | Vary in species specific manner                                                                            |
| 3      | T187    | Not an SDP, primarily T in most species (A in Sudan viruses)                                               |
| 3      | F197    | Vary in species specific manner                                                                            |
|        |         |                                                                                                            |
| 4      | V201    | Vary in species specific manner                                                                            |
|        |         |                                                                                                            |
| 5      | S50     | Not an SDP                                                                                                 |

**Supplementary Table 18.** Residues in VP24 previously identified to differ between Reston viruses and Ebola viruses and/or Sudan viruses. Zhang et al., identified five regions that differed between Reston viruses and Ebola viruses and/or Sudan viruses<sup>7</sup>. The five regions are listed along with conservation information i.e. whether the position is an SDP, varies in a species specific manner (i.e. not an SDP, but a different residue is conserved in each of the different species) or otherwise conserved. Region one is part of the KPNA5 (karyopherin  $\alpha$ 5) binding site and region two is thought to be part of the STAT1 binding site<sup>7</sup>.

| <b>Mutation</b>                                     | <b>Location/Comments</b>                                                                                                                                                                                                                              | <b>Relationship to SDPs</b>                |
|-----------------------------------------------------|-------------------------------------------------------------------------------------------------------------------------------------------------------------------------------------------------------------------------------------------------------|--------------------------------------------|
| From Volchhkov et al., <sup>43</sup> – experiment 1 |                                                                                                                                                                                                                                                       |                                            |
| M71I                                                | Surface residue. Not clear what functional effect would be.                                                                                                                                                                                           | Not close                                  |
| L147P                                               | Part of an alpha helix, the proline would be expected to break the helix and could lead to conformational changes that would alter function.                                                                                                          | Close to SDPs L17M, V22I                   |
| T187I                                               | Adjacent to interface site. T187 forms Hydrogen bonds with the backbone of H186 and E203. Mutation to I would remove these hydrogen bonds and reduce stability/increase flexibility in this area. (Also close to L26F mutation from a separate study) | Not close                                  |
| From Volchhkov et al., <sup>43</sup> – experiment 2 |                                                                                                                                                                                                                                                       |                                            |
| H186Y                                               | Present in interface with KPNA5. Forms a hydrogen bond with the backbone of T434 in KPNA5. Mutation to Tyr would still enable Hydrogen bonding with KPNA as the functional group is maintained.                                                       | Not close                                  |
| From Ebihara et al., <sup>44</sup>                  |                                                                                                                                                                                                                                                       |                                            |
| T50I                                                | The side chain of Ebola virus T50 can hydrogen bond with the backbones of Q36 and K52. Removal of these interactions with mutation Ile will reduce stability/increase flexibility.                                                                    | Close to SDP T226A                         |
| From Dowall et al., <sup>45</sup>                   |                                                                                                                                                                                                                                                       |                                            |
| L26F                                                | Largely buried side chain. Increase in size to phenylalanine could require some conformational change. Interesting that is located close to T187I (see above).                                                                                        | Close to V22I                              |
| F29V*                                               | Largely buried side chain. Reduction in size would create space and therefore likely to result in some conformational change?                                                                                                                         | Close in space to SDPs T131S, N132T, V31I. |
| A43P*                                               | Close in space to L26F (see above). Present in a turn.                                                                                                                                                                                                |                                            |
| K218R*                                              | Appears to be a conservative change. K218 is present in the KPNA5 interface. Is close to M436 and D489. Possible electrostatic interaction. Possible the mutation to R enables this interaction to continue in the different species.                 |                                            |

**Supplementary Table 19. VP24 Mutations occurring in adaption of Ebola virus to rodent species.**

The location of the mutation and how it may alter structure and function is listed with details of proximity to SDPs. \*indicates that after passage one the predominant amino acid at that position was the wild type<sup>44</sup>. In the Dowall et al.<sup>45</sup>, study L26F is the only mutation where the mutation is predominantly maintained in in all passages. Separate experimental evidence suggests that the L26F mutation along results in pathogenicity in guinea pigs<sup>37</sup>.

| Genome Identifier | Ebola virus species                                                        | Host  |
|-------------------|----------------------------------------------------------------------------|-------|
| gb:KJ660346       | Organism:Zaire ebolavirus H.sapiens-wt/GIN/2014/Makona-Kissidougou-C15     | Human |
| gb:KJ660347       | Organism:Zaire ebolavirus H.sapiens-wt/GIN/2014/Makona-Gueckedou-C07       | Human |
| gb:KJ660348       | Organism:Zaire ebolavirus H.sapiens-wt/GIN/2014/Makona-Gueckedou-C05       | Human |
| gb:KP342330       | Organism:Zaire ebolavirus H.sapiens-wt/GIN/2014/Conacry-192                | Human |
| gb:KP096422       | Organism:Zaire ebolavirus H.sapiens-tc/GIN/14/WPG-C15                      | Human |
| gb:KP096421       | Organism:Zaire ebolavirus H.sapiens-tc/GIN/14/WPG-C07                      | Human |
| gb:KP096420       | Organism:Zaire ebolavirus H.sapiens-tc/GIN/14/WPG-C05                      | Human |
| gb:KC242800       | Organism:Zaire ebolavirus EBOV/H.sapiens-tc/GAB/2002/Illembé               | Human |
| gb:KC242794       | Organism:Zaire ebolavirus EBOV/H.sapiens-tc/GAB/1996/2Nza                  | Human |
| gb:KC242797       | Organism:Zaire ebolavirus EBOV/H.sapiens-tc/GAB/1996/1Oba                  | Human |
| gb:KC242795       | Organism:Zaire ebolavirus EBOV/H.sapiens-tc/GAB/1996/1Mbie                 | Human |
| gb:KC242798       | Organism:Zaire ebolavirus EBOV/H.sapiens-tc/GAB/1996/1Ikot                 | Human |
| gb:KC242793       | Organism:Zaire ebolavirus EBOV/H.sapiens-tc/GAB/1996/1Eko                  | Human |
| gb:KC242792       | Organism:Zaire ebolavirus EBOV/H.sapiens-tc/GAB/1994/Gabon                 | Human |
| gb:KC242784       | Organism:Zaire ebolavirus EBOV/H.sapiens-tc/COD/2007/9 Luebo               | Human |
| gb:KC242790       | Organism:Zaire ebolavirus EBOV/H.sapiens-tc/COD/2007/5 Luebo               | Human |
| gb:KC242788       | Organism:Zaire ebolavirus EBOV/H.sapiens-tc/COD/2007/43 Luebo              | Human |
| gb:KC242789       | Organism:Zaire ebolavirus EBOV/H.sapiens-tc/COD/2007/4 Luebo               | Human |
| gb:KC242787       | Organism:Zaire ebolavirus EBOV/H.sapiens-tc/COD/2007/23 Luebo              | Human |
| gb:KC242786       | Organism:Zaire ebolavirus EBOV/H.sapiens-tc/COD/2007/1 Luebo               | Human |
| gb:KC242785       | Organism:Zaire ebolavirus EBOV/H.sapiens-tc/COD/2007/0 Luebo               | Human |
| gb:KC242799       | Organism:Zaire ebolavirus EBOV/H.sapiens-tc/COD/1995/13709 Kikwit          | Human |
| gb:KC242796       | Organism:Zaire ebolavirus EBOV/H.sapiens-tc/COD/1995/13625 Kikwit          | Human |
| gb:KC242791       | Organism:Zaire ebolavirus EBOV/H.sapiens-tc/COD/1977/Bonduni               | Human |
| gb:KC242801       | Organism:Zaire ebolavirus EBOV/H.sapiens-tc/COD/1976/deRoover              | Human |
| gb:KM233118       | Organism:Zaire ebolavirus Ebola virus/H.sapiens-wt/SLE/2014/Makona-NM042.3 | Human |
| gb:KM233117       | Organism:Zaire ebolavirus Ebola virus/H.sapiens-wt/SLE/2014/Makona-NM042.2 | Human |
| gb:KM233116       | Organism:Zaire ebolavirus Ebola virus/H.sapiens-wt/SLE/2014/Makona-NM042.1 | Human |
| gb:KM233115       | Organism:Zaire ebolavirus Ebola virus/H.sapiens-wt/SLE/2014/Makona-G3857   | Human |
| gb:KM233114       | Organism:Zaire ebolavirus Ebola virus/H.sapiens-wt/SLE/2014/Makona-G3856.3 | Human |
| gb:KM233113       | Organism:Zaire ebolavirus Ebola virus/H.sapiens-wt/SLE/2014/Makona-G3856.1 | Human |
| gb:KM233112       | Organism:Zaire ebolavirus Ebola virus/H.sapiens-wt/SLE/2014/Makona-G3851   | Human |
| gb:KM233111       | Organism:Zaire ebolavirus Ebola virus/H.sapiens-wt/SLE/2014/Makona-G3850   | Human |
| gb:KM233110       | Organism:Zaire ebolavirus Ebola virus/H.sapiens-wt/SLE/2014/Makona-G3848   | Human |
| gb:KM233109       | Organism:Zaire ebolavirus Ebola virus/H.sapiens-wt/SLE/2014/Makona-G3846   | Human |
| gb:KM233108       | Organism:Zaire ebolavirus Ebola virus/H.sapiens-wt/SLE/2014/Makona-G3845   | Human |
| gb:KM233107       | Organism:Zaire ebolavirus Ebola virus/H.sapiens-wt/SLE/2014/Makona-G3841   | Human |
| gb:KM233106       | Organism:Zaire ebolavirus Ebola virus/H.sapiens-wt/SLE/2014/Makona-G3840   | Human |
| gb:KM233105       | Organism:Zaire ebolavirus Ebola virus/H.sapiens-wt/SLE/2014/Makona-G3838   | Human |
| gb:KM233104       | Organism:Zaire ebolavirus Ebola virus/H.sapiens-wt/SLE/2014/Makona-G3834   | Human |
| gb:KM233103       | Organism:Zaire ebolavirus Ebola virus/H.sapiens-wt/SLE/2014/Makona-G3831   | Human |
| gb:KM233102       | Organism:Zaire ebolavirus Ebola virus/H.sapiens-wt/SLE/2014/Makona-G3829   | Human |
| gb:KM233101       | Organism:Zaire ebolavirus Ebola virus/H.sapiens-wt/SLE/2014/Makona-G3827   | Human |
| gb:KM233100       | Organism:Zaire ebolavirus Ebola virus/H.sapiens-wt/SLE/2014/Makona-G3826   | Human |
| gb:KM233099       | Organism:Zaire ebolavirus Ebola virus/H.sapiens-wt/SLE/2014/Makona-G3825.2 | Human |
| gb:KM233098       | Organism:Zaire ebolavirus Ebola virus/H.sapiens-wt/SLE/2014/Makona-G3825.1 | Human |
| gb:KM233097       | Organism:Zaire ebolavirus Ebola virus/H.sapiens-wt/SLE/2014/Makona-G3823   | Human |
| gb:KM233096       | Organism:Zaire ebolavirus Ebola virus/H.sapiens-wt/SLE/2014/Makona-G3822   | Human |
| gb:KM233095       | Organism:Zaire ebolavirus Ebola virus/H.sapiens-wt/SLE/2014/Makona-G3821   | Human |
| gb:KM233094       | Organism:Zaire ebolavirus Ebola virus/H.sapiens-wt/SLE/2014/Makona-G3820   | Human |
| gb:KM233093       | Organism:Zaire ebolavirus Ebola virus/H.sapiens-wt/SLE/2014/Makona-G3819   | Human |
| gb:KM233092       | Organism:Zaire ebolavirus Ebola virus/H.sapiens-wt/SLE/2014/Makona-G3818   | Human |





|              |                                                                                |            |
|--------------|--------------------------------------------------------------------------------|------------|
| gb:KM034553  | Organism:Zaire ebolavirus Ebola virus/H.sapiens-wt/SLE/2014/Makona-G3670.1     | Human      |
| gb:KM233048  | Organism:Zaire ebolavirus Ebola virus/H.sapiens-wt/SLE/2014/Makona-EM124.4     | Human      |
| gb:KM233047  | Organism:Zaire ebolavirus Ebola virus/H.sapiens-wt/SLE/2014/Makona-EM124.3     | Human      |
| gb:KM233046  | Organism:Zaire ebolavirus Ebola virus/H.sapiens-wt/SLE/2014/Makona-EM124.2     | Human      |
| gb:KM233045  | Organism:Zaire ebolavirus Ebola virus/H.sapiens-wt/SLE/2014/Makona-EM124.1     | Human      |
| gb:KM233044  | Organism:Zaire ebolavirus Ebola virus/H.sapiens-wt/SLE/2014/Makona-EM121       | Human      |
| gb:KM233043  | Organism:Zaire ebolavirus Ebola virus/H.sapiens-wt/SLE/2014/Makona-EM120       | Human      |
| gb:KM233042  | Organism:Zaire ebolavirus Ebola virus/H.sapiens-wt/SLE/2014/Makona-EM119       | Human      |
| gb:KM233041  | Organism:Zaire ebolavirus Ebola virus/H.sapiens-wt/SLE/2014/Makona-EM115       | Human      |
| gb:KM233040  | Organism:Zaire ebolavirus Ebola virus/H.sapiens-wt/SLE/2014/Makona-EM113       | Human      |
| gb:KM233039  | Organism:Zaire ebolavirus Ebola virus/H.sapiens-wt/SLE/2014/Makona-EM112       | Human      |
| gb:KM233038  | Organism:Zaire ebolavirus Ebola virus/H.sapiens-wt/SLE/2014/Makona-EM111       | Human      |
| gb:KM233037  | Organism:Zaire ebolavirus Ebola virus/H.sapiens-wt/SLE/2014/Makona-EM110       | Human      |
| gb:KM233036  | Organism:Zaire ebolavirus Ebola virus/H.sapiens-wt/SLE/2014/Makona-EM106       | Human      |
| gb:KM233035  | Organism:Zaire ebolavirus Ebola virus/H.sapiens-wt/SLE/2014/Makona-EM104       | Human      |
| gb:KM034552  | Organism:Zaire ebolavirus Ebola virus/H.sapiens-wt/SLE/2014/Makona-EM098       | Human      |
| gb:KM034551  | Organism:Zaire ebolavirus Ebola virus/H.sapiens-wt/SLE/2014/Makona-EM096       | Human      |
| gb:KM034549  | Organism:Zaire ebolavirus Ebola virus/H.sapiens-wt/SLE/2014/Makona-EM095B      | Human      |
| gb:KM034550  | Organism:Zaire ebolavirus Ebola virus/H.sapiens-wt/SLE/2014/Makona-EM095       | Human      |
| gb:KP178538  | Organism:Zaire ebolavirus Ebola virus/H.sapiens-wt/LBR/2014/Makona-201403007   | Human      |
| gb:KP120616  | Organism:Zaire ebolavirus Ebola virus/H.sapiens-wt/GBR/2014/Makona-UK1         | Human      |
| gb:KP271020  | Organism:Zaire ebolavirus Ebola virus/H.sapiens-wt/COD/2014/Lomela-Lokolia19   | Human      |
| gb:KP271018  | Organism:Zaire ebolavirus Ebola virus/H.sapiens-wt/COD/2014/Lomela-Lokolia16   | Human      |
| gb:KP728283  | Organism:Zaire ebolavirus Ebola virus/H.sapiens-wt/CHE/2014/Makona-GE1         | Human      |
| gb:KP701371  | Organism:Zaire ebolavirus Ebola virus/H.sapiens-tc/SLE/2014/Makona-Italy-INMI1 | Human      |
| gb:KP184503  | Organism:Zaire ebolavirus Ebola virus/H.sapiens-tc/GBR/2014/Makona-UK1.1       | Human      |
| gb:KM655246  | Organism:Zaire ebolavirus Ebola virus/H.sapiens-tc/COD/1976/Yambuku-Ecran      | Human      |
| gb:KP260802  | Organism:Zaire ebolavirus Ebola virus H.sapiens/MLI/14/Manoka-Mali-DPR4        | Human      |
| gb:KP260801  | Organism:Zaire ebolavirus Ebola virus H.sapiens/MLI/14/Manoka-Mali-DPR3        | Human      |
| gb:KP260800  | Organism:Zaire ebolavirus Ebola virus H.sapiens/MLI/14/Manoka-Mali-DPR2        | Human      |
| gb:KP260799  | Organism:Zaire ebolavirus Ebola virus H.sapiens/MLI/14/Manoka-Mali-DPR1        | Human      |
| gb:NC_002549 | Organism:Zaire ebolavirus Ebola virus H.sapiens-tc/COD/1976/Yambuku-Mayinga    | Unknown    |
| gb:AY354458  | Organism:Zaire ebolavirus Zaire 1995                                           | Unknown    |
| gb:JA489037  | Organism:Zaire ebolavirus UNKNOWN-JA489037                                     | Unknown    |
| gb:HC874683  | Organism:Zaire ebolavirus UNKNOWN-HC874683                                     |            |
| gb:HC874681  | Organism:Zaire ebolavirus UNKNOWN-HC874681                                     |            |
| gb:HC874677  | Organism:Zaire ebolavirus UNKNOWN-HC874677                                     |            |
| gb:HC874665  | Organism:Zaire ebolavirus UNKNOWN-HC874665                                     |            |
| gb:HC874661  | Organism:Zaire ebolavirus UNKNOWN-HC874661                                     |            |
| gb:HC069241  | Organism:Zaire ebolavirus UNKNOWN-HC069241                                     |            |
| gb:HC069239  | Organism:Zaire ebolavirus UNKNOWN-HC069239                                     |            |
| gb:HC069235  | Organism:Zaire ebolavirus UNKNOWN-HC069235                                     |            |
| gb:HC069221  | Organism:Zaire ebolavirus UNKNOWN-HC069221                                     |            |
| gb:HC069217  | Organism:Zaire ebolavirus UNKNOWN-HC069217                                     |            |
| gb:KF827427  | Organism:Zaire ebolavirus rec/COD/1976/Mayinga-rgEBOV                          | Human      |
| gb:AF272001  | Organism:Zaire ebolavirus Mayinga                                              | Guinea Pig |
| gb:AF499101  | Organism:Zaire ebolavirus Mayinga                                              | Guinea Pig |
| gb:AY142960  | Organism:Zaire ebolavirus Mayinga                                              | Guinea Pig |
| gb:EU224440  | Organism:Zaire ebolavirus Mayinga                                              | Guinea Pig |
| gb:AF086833  | Organism:Zaire ebolavirus Mayinga                                              | Guinea Pig |
| gb:JQ352763  | Organism:Zaire ebolavirus Kikwit                                               | Unknown    |
| gb:JA489027  | Organism:Tai Forest ebolavirus UNKNOWN-JA489027                                | Unknown    |
| gb:FJ217162  | Organism:Tai Forest ebolavirus UNKNOWN-FJ217162                                | Human      |

|              |                                                                                                |         |
|--------------|------------------------------------------------------------------------------------------------|---------|
| gb:NC_014372 | Organism:Tai Forest ebolavirus Tai Forest virus/H.sapiens-tc/CIV/1994/Pauleoula-CI             | Human   |
| gb:EU338380  | Organism:Sudan ebolavirus Yambio                                                               | Human   |
| gb:HC874655  | Organism:Sudan ebolavirus UNKNOWN-HC874655                                                     |         |
| gb:HC069211  | Organism:Sudan ebolavirus UNKNOWN-HC069211                                                     |         |
| gb:KC242783  | Organism:Sudan ebolavirus SUDV/H.sapiens-tc/SSD/1979/Maleo                                     | Human   |
| gb:NC_006432 | Organism:Sudan ebolavirus Sudan virus/H.sapiens-tc/UGA/2000/Gulu-808892                        | Unknown |
| gb:JN638998  | Organism:Sudan ebolavirus Sudan                                                                | Human   |
| gb:AY729654  | Organism:Sudan ebolavirus Gulu                                                                 | Unknown |
| gb:KC545392  | Organism:Sudan ebolavirus EboSud-682 2012                                                      | Human   |
| gb:KC589025  | Organism:Sudan ebolavirus EboSud-639                                                           | Human   |
| gb:KC545391  | Organism:Sudan ebolavirus EboSud-609 2012                                                      | Human   |
| gb:KC545390  | Organism:Sudan ebolavirus EboSud-603 2012                                                      | Human   |
| gb:KC545389  | Organism:Sudan ebolavirus EboSud-602 2012                                                      | Human   |
| gb:FJ968794  | Organism:Sudan ebolavirus Boniface                                                             | Unknown |
| gb:HC874675  | Organism:Reston ebolavirus UNKNOWN-HC874675                                                    |         |
| gb:HC874663  | Organism:Reston ebolavirus UNKNOWN-HC874663                                                    |         |
| gb:HC874659  | Organism:Reston ebolavirus UNKNOWN-HC874659                                                    |         |
| gb:HC874657  | Organism:Reston ebolavirus UNKNOWN-HC874657                                                    |         |
| gb:HC069233  | Organism:Reston ebolavirus UNKNOWN-HC069233                                                    |         |
| gb:HC069219  | Organism:Reston ebolavirus UNKNOWN-HC069219                                                    |         |
| gb:HC069215  | Organism:Reston ebolavirus UNKNOWN-HC069215                                                    |         |
| gb:HC069213  | Organism:Reston ebolavirus UNKNOWN-HC069213                                                    |         |
| gb:JX477165  | Organism:Reston ebolavirus Reston09-A                                                          | Swine   |
| gb:FJ621585  | Organism:Reston ebolavirus Reston08-E                                                          | Swine   |
| gb:FJ621584  | Organism:Reston ebolavirus Reston08-C                                                          | Swine   |
| gb:FJ621583  | Organism:Reston ebolavirus Reston08-A                                                          | Swine   |
| gb:NC_004161 | Organism:Reston ebolavirus Reston virus/M.fascicularis-tc/USA/1989/Philippines89- Pennsylvania | Unknown |
| gb:AB050936  | Organism:Reston ebolavirus Reston                                                              |         |
| gb:AF522874  | Organism:Reston ebolavirus Pennsylvania                                                        |         |
| gb:AY769362  | Organism:Reston ebolavirus Pennsylvania                                                        |         |
| gb:JX477166  | Organism:Reston ebolavirus Alice, TX USA MkCQ8167                                              | Monkey  |
| gb:NC_014373 | Organism:Bundibugyo virus Bundibugyo virus/H.sapiens-tc/UGA/2007/Butalya-811250                | Human   |
| gb:JA489018  | Organism:Bundibugyo ebolavirus UNKNOWN-JA489018                                                | Unknown |
| gb:FJ217161  | Organism:Bundibugyo ebolavirus UNKNOWN-FJ217161                                                | Human   |
| gb:KC545396  | Organism:Bundibugyo ebolavirus EboBund-14 2012                                                 | Human   |
| gb:KC545395  | Organism:Bundibugyo ebolavirus EboBund-122 2012                                                | Human   |
| gb:KC545394  | Organism:Bundibugyo ebolavirus EboBund-120 2012                                                | Human   |
| gb:KC545393  | Organism:Bundibugyo ebolavirus EboBund-112 2012                                                | Human   |

**Supplementary Table 20. Information on the 196 complete *Ebolavirus* genomes.** Genomes were downloaded from Virus Pathogen Resource, VIPR (<http://www.viprbrc.org/brc/home.spg?decorator=vipr>) .

| <b>Protein</b> | <b>Effective number of sequences</b> | <b>Effective number of human pathogenic sequence</b> | <b>Effective number of Reston virus sequences</b> |
|----------------|--------------------------------------|------------------------------------------------------|---------------------------------------------------|
| GP             | 95.15                                | 86                                                   | 4                                                 |
| L              | 99.2                                 | 78                                                   | 7                                                 |
| NP             | 148.96                               | 133                                                  | 7                                                 |
| VP24           | 88.2                                 | 79                                                   | 7                                                 |
| VP30           | 96.04                                | 84                                                   | 7                                                 |
| VP35           | 99.96                                | 87                                                   | 7                                                 |
| VP40           | 90.16                                | 80                                                   | 7                                                 |

**Supplementary Table 21. Effective number of independent sequences in the dataset.** The effective number of independent sequences present in the multiple sequence alignments for each of the *Ebolavirus* proteins is shown. Values were calculated using hmmer (see material and methods).
